# Supplementary material for: Transcriptomics analysis reveals new insights in E171-induced molecular alterations in a mouse model of colon cancer
Source: PubMed Central journal article supplement (PMC6021444; doi:10.1038/s41598-018-28063-z), 2018-06-27
Supplement: 41598_2018_28063_MOESM1_ESM.pdf [file 41598_2018_28063_MOESM1_ESM.pdf]

## Supplementary information

### Transcriptomics analysis reveals new insights in E171-induced molecular alterations in a mouse model of colon cancer

Héloïse Proquin<sup>1@</sup>, Marlon J. Jetten<sup>1</sup>, Marloes Jonkhout<sup>1</sup>, Luis Guillermo Garduño-Balderas<sup>2</sup>, Jacob J. Briedé<sup>1</sup>, Theo M. de Kok<sup>1</sup>, Henk van Loveren<sup>1</sup>, Yolanda I. Chirino<sup>2,3</sup>

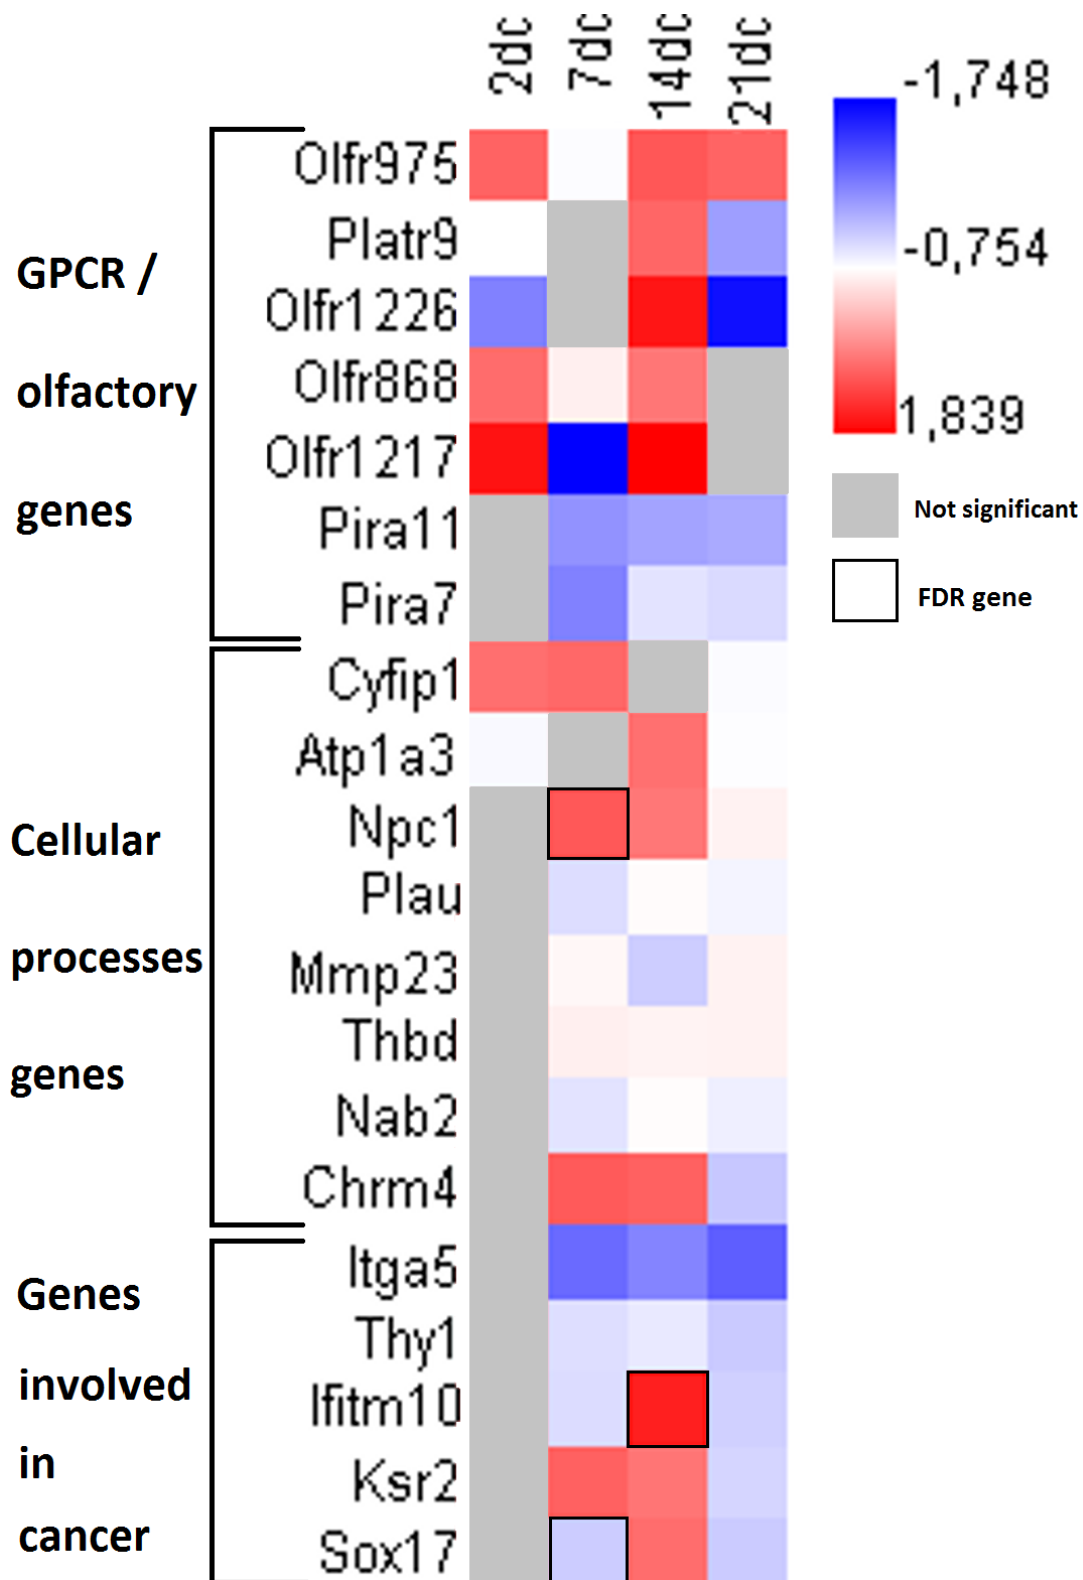

**Supplementary Figure 1:** Heat map of DEG ( $p < 0.05$  and  $\text{Log}_2\text{FC} > 1.5$ ) common in 3 out of 4 time points or in all time points after exposure to E171 in colon of mice for 2, 7, 14 and 21 days.

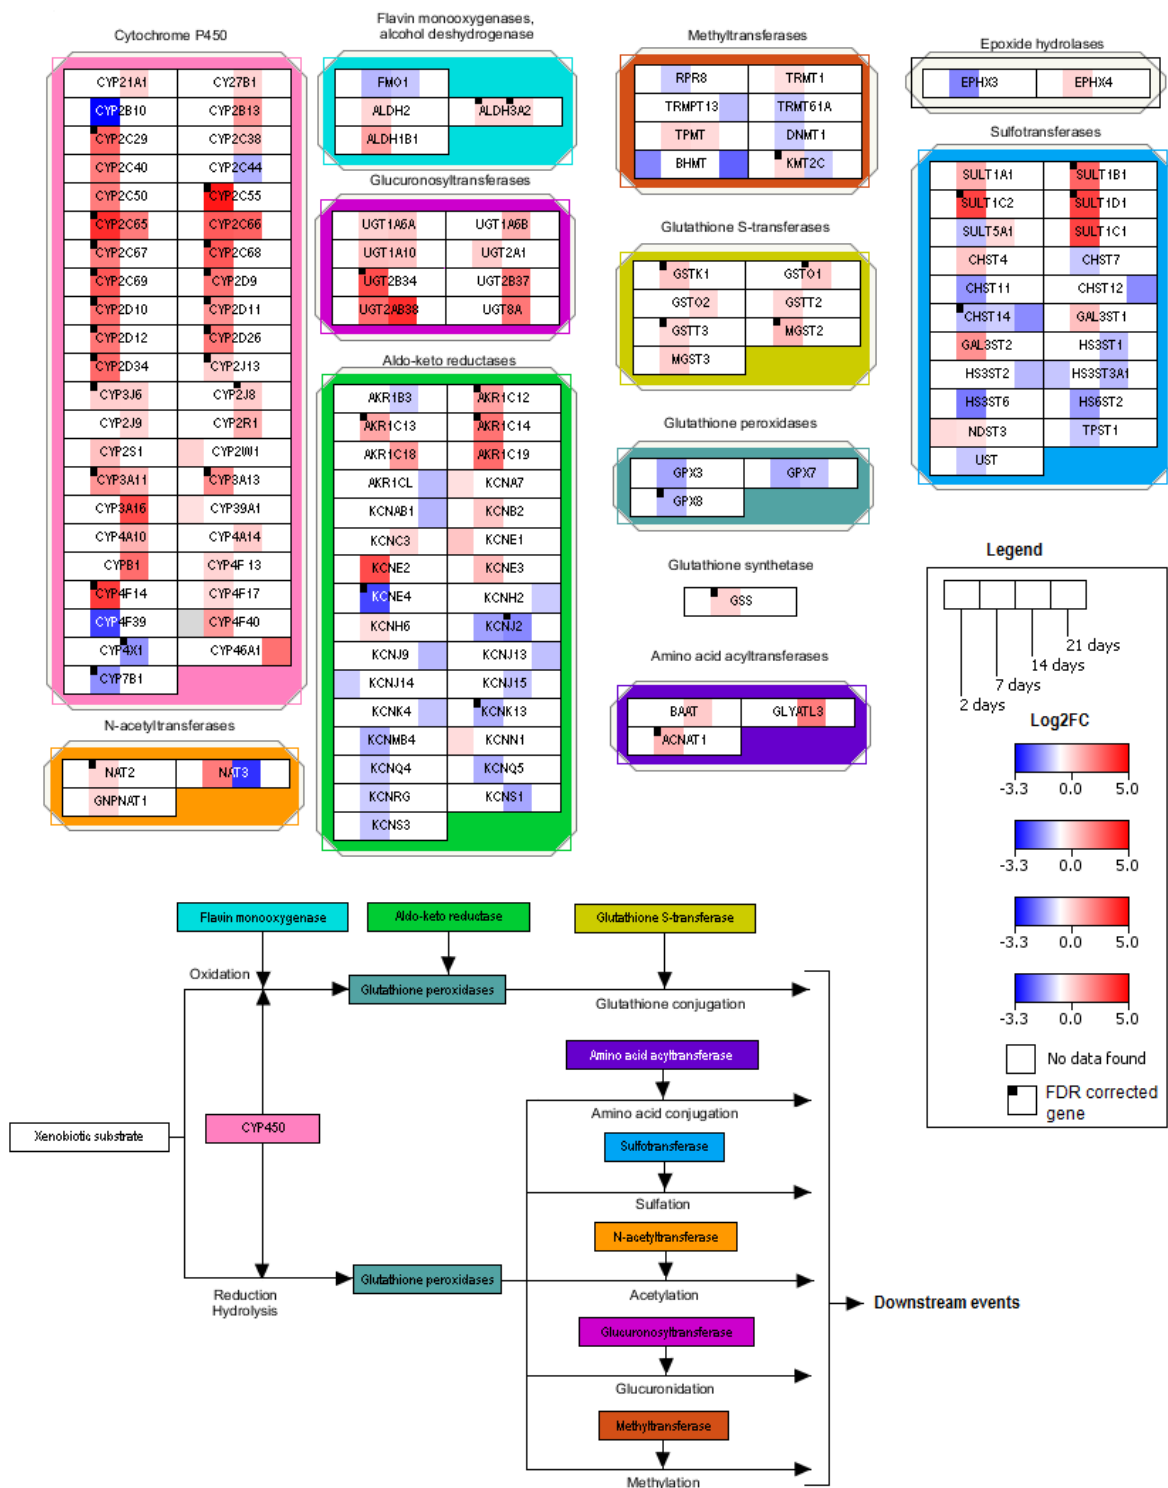

**Supplementary Figure 2:** Metapathway of biotransformation Phase I and II with DEGs after exposure to E171 for 2, 7, 14 and 21 days in the colon of mice.

**Supplementary Table 1:** Details results of ORA after 2 days of exposure of E171 in BALB/c mice in combination with AOM/DSS. Numbers in bold correspond to upregulated genes. Log2FC= Log2 fold change obtained with LIMMA script with correction for its own time-matched control.

| Group of pathways | Pathways               | EntrezGeneID                 | Genes           | Log2FC          |
|-------------------|------------------------|------------------------------|-----------------|-----------------|
| Signalling        | Olfactory transduction | 258542                       | Olfr786         | -3.17822        |
|                   |                        | 384732                       | Gm10081         | -1.50511        |
|                   |                        | 258882                       | Olfr874         | -1.49093        |
|                   |                        | 258969                       | Olfr1226        | -1.24509        |
|                   |                        | 257910                       | Olfr671         | -0.66153        |
|                   |                        | <b>258272</b>                | <b>Olfr1402</b> | <b>0.697679</b> |
|                   |                        | <b>57269</b>                 | <b>Olfr1507</b> | <b>0.72437</b>  |
|                   |                        | <b>258552</b>                | <b>Olfr868</b>  | <b>0.737959</b> |
|                   |                        | <b>258328</b>                | <b>Olfr954</b>  | <b>0.753012</b> |
|                   |                        | <b>258581</b>                | <b>Olfr1030</b> | <b>0.771431</b> |
|                   |                        | <b>259119</b>                | <b>Olfr578</b>  | <b>0.793142</b> |
|                   |                        | <b>258825</b>                | <b>Olfr975</b>  | <b>0.82989</b>  |
|                   |                        | <b>258487</b>                | <b>Olfr722</b>  | <b>0.834</b>    |
|                   |                        | <b>258436</b>                | <b>Olfr458</b>  | <b>0.849033</b> |
|                   |                        | <b>404311</b>                | <b>Olfr209</b>  | <b>0.879874</b> |
|                   |                        | <b>404307</b>                | <b>Olfr100</b>  | <b>0.894926</b> |
|                   |                        | <b>257932</b>                | <b>Olfr332</b>  | <b>0.911724</b> |
|                   |                        | <b>258730</b>                | <b>Olfr483</b>  | <b>0.959872</b> |
|                   |                        | <b>258938</b>                | <b>Olfr1417</b> | <b>0.998041</b> |
|                   |                        | <b>258269</b>                | <b>Olfr930</b>  | <b>1.062573</b> |
|                   |                        | <b>258379</b>                | <b>Olfr1284</b> | <b>1.119586</b> |
|                   |                        | <b>258823</b>                | <b>Olfr969</b>  | <b>1.169048</b> |
|                   |                        | <b>258705</b>                | <b>Olfr398</b>  | <b>1.220772</b> |
|                   |                        | <b>258623</b>                | <b>Olfr123</b>  | <b>1.239045</b> |
|                   |                        | <b>258281</b>                | <b>Olfr780</b>  | <b>1.274172</b> |
|                   |                        | <b>57251</b>                 | <b>Olfr870</b>  | <b>1.361035</b> |
|                   |                        | <b>258616</b>                | <b>Olfr357</b>  | <b>1.496832</b> |
|                   |                        | <b>258903</b>                | <b>Olfr1217</b> | <b>1.653872</b> |
|                   |                        | <b>18332</b>                 | <b>Olfr33</b>   | <b>1.754651</b> |
|                   |                        | <b>258065</b>                | <b>Olfr312</b>  | <b>1.769029</b> |
|                   |                        | <b>404315</b>                | <b>Olfr372</b>  | <b>2.603612</b> |
|                   |                        | Olfactory signalling Pathway | 258542          | Olfr786         |
|                   |                        | 384732                       | Gm10081         | -1.50511        |
|                   |                        | 258882                       | Olfr874         | -1.49093        |
|                   |                        | 258969                       | Olfr1226        | -1.24509        |

|  |                            |               |                 |                 |
|--|----------------------------|---------------|-----------------|-----------------|
|  |                            | <b>257910</b> | <b>Olfr671</b>  | <b>-0.66153</b> |
|  |                            | <b>258064</b> | <b>Olfr316</b>  | <b>0.63679</b>  |
|  |                            | <b>258552</b> | <b>Olfr868</b>  | <b>0.737959</b> |
|  |                            | <b>259119</b> | <b>Olfr578</b>  | <b>0.793142</b> |
|  |                            | <b>258487</b> | <b>Olfr722</b>  | <b>0.834</b>    |
|  |                            | <b>258730</b> | <b>Olfr483</b>  | <b>0.959872</b> |
|  |                            | <b>258269</b> | <b>Olfr930</b>  | <b>1.062573</b> |
|  |                            | <b>258281</b> | <b>Olfr780</b>  | <b>1.274172</b> |
|  |                            | <b>258616</b> | <b>Olfr357</b>  | <b>1.496832</b> |
|  |                            | <b>258903</b> | <b>Olfr1217</b> | <b>1.653872</b> |
|  |                            | <b>404315</b> | <b>Olfr372</b>  | <b>2.603612</b> |
|  | GPCR downstream signalling | 258542        | Olfr786         | -3.17822        |
|  |                            | 384732        | Gm10081         | -1.50511        |
|  |                            | 258882        | Olfr874         | -1.49093        |
|  |                            | 11516         | Adcyap1         | -1.36922        |
|  |                            | 51801         | Ramp1           | -1.36477        |
|  |                            | 258969        | Olfr1226        | -1.24509        |
|  |                            | 257910        | Olfr671         | -0.66153        |
|  |                            | 22065         | Trpc3           | -0.61276        |
|  |                            | <b>18798</b>  | <b>Plcb4</b>    | <b>0.621196</b> |
|  |                            | <b>258064</b> | <b>Olfr316</b>  | <b>0.63679</b>  |
|  |                            | <b>258552</b> | <b>Olfr868</b>  | <b>0.737959</b> |
|  |                            | <b>19218</b>  | <b>Ptger3</b>   | <b>0.76914</b>  |
|  |                            | <b>259119</b> | <b>Olfr578</b>  | <b>0.793142</b> |
|  |                            | <b>258487</b> | <b>Olfr722</b>  | <b>0.834</b>    |
|  |                            | <b>12426</b>  | <b>Cckbr</b>    | <b>0.939752</b> |
|  |                            | <b>258730</b> | <b>Olfr483</b>  | <b>0.959872</b> |
|  |                            | <b>258269</b> | <b>Olfr930</b>  | <b>1.062573</b> |
|  |                            | <b>258281</b> | <b>Olfr780</b>  | <b>1.274172</b> |
|  |                            | <b>258616</b> | <b>Olfr357</b>  | <b>1.496832</b> |
|  |                            | <b>258903</b> | <b>Olfr1217</b> | <b>1.653872</b> |
|  |                            | <b>404315</b> | <b>Olfr372</b>  | <b>2.603612</b> |
|  | Signalling by GPCR         | 258542        | Olfr786         | -3.17822        |
|  |                            | 384732        | Gm10081         | -1.50511        |
|  |                            | 258882        | Olfr874         | -1.49093        |
|  |                            | 11516         | Adcyap1         | -1.36922        |
|  |                            | 51801         | Ramp1           | -1.36477        |
|  |                            | 258969        | Olfr1226        | -1.24509        |
|  |                            | 257910        | Olfr671         | -0.66153        |
|  |                            | 22065         | Trpc3           | -0.61276        |
|  |                            | <b>18798</b>  | <b>Plcb4</b>    | <b>0.621196</b> |

|  |  |               |                 |                 |
|--|--|---------------|-----------------|-----------------|
|  |  | <b>258064</b> | <b>Olfr316</b>  | <b>0.63679</b>  |
|  |  | <b>258552</b> | <b>Olfr868</b>  | <b>0.737959</b> |
|  |  | <b>19218</b>  | <b>Ptger3</b>   | <b>0.76914</b>  |
|  |  | <b>259119</b> | <b>Olfr578</b>  | <b>0.793142</b> |
|  |  | <b>258487</b> | <b>Olfr722</b>  | <b>0.834</b>    |
|  |  | <b>12426</b>  | <b>Cckbr</b>    | <b>0.939752</b> |
|  |  | <b>258730</b> | <b>Olfr483</b>  | <b>0.959872</b> |
|  |  | <b>258269</b> | <b>Olfr930</b>  | <b>1.062573</b> |
|  |  | <b>258281</b> | <b>Olfr780</b>  | <b>1.274172</b> |
|  |  | <b>258616</b> | <b>Olfr357</b>  | <b>1.496832</b> |
|  |  | <b>258903</b> | <b>Olfr1217</b> | <b>1.653872</b> |
|  |  | <b>83770</b>  | <b>Tas1r2</b>   | <b>1.725032</b> |
|  |  | <b>404315</b> | <b>Olfr372</b>  | <b>2.603612</b> |

**Supplementary Table 2:** Details results of ORA after 7 days of exposure of E171 in BALB/c mice in combination with AOM/DSS. Numbers in bold correspond to upregulated genes. Log2FC= Log2 fold change obtained with LIMMA script with correction for its own time-matched control.

| Group of pathways | Pathways                             | EntrezGeneID    | Genes          | Log2FC          |
|-------------------|--------------------------------------|-----------------|----------------|-----------------|
| Signalling        | Class A/1 (Rhodopsin-like receptors) | <b>20311</b>    | <i>Cxcl5</i>   | <b>-4.34495</b> |
|                   |                                      | 14825           | <i>Cxcl1</i>   | -3.66321        |
|                   |                                      | <b>12765</b>    | <i>Cxcr2</i>   | <b>-3.17533</b> |
|                   |                                      | 14293           | <i>Fpr1</i>    | -3.03344        |
|                   |                                      | 381489          | <i>Rxfp1</i>   | -2.58548        |
|                   |                                      | 14289           | <i>Fpr2</i>    | -2.50436        |
|                   |                                      | 20306           | <i>Ccl7</i>    | -2.30947        |
|                   |                                      | 109648          | <i>Npy</i>     | -2.19308        |
|                   |                                      | <b>11835</b>    | <i>Ar</i>      | <b>-1.51719</b> |
|                   |                                      | 30878           | <i>Apln</i>    | -2.06475        |
|                   |                                      | 16995           | <i>Ltb4r1</i>  | -1.87125        |
|                   |                                      | 11541           | <i>Adora2b</i> | -1.82001        |
|                   |                                      | 20303           | <i>Ccl4</i>    | -1.80734        |
|                   |                                      | 12273           | <i>C5ar1</i>   | -1.78012        |
|                   |                                      | 18610           | <i>Pdyn</i>    | -1.69401        |
|                   |                                      | 80885           | <i>Hcar2</i>   | -1.60399        |
|                   |                                      | 12778           | <i>Ackr3</i>   | -1.56997        |
|                   |                                      | 54140           | <i>Avpr1a</i>  | -1.40933        |
|                   |                                      | 19220           | <i>Ptgfr</i>   | -1.35934        |
|                   |                                      | 22044           | <i>Trh</i>     | -1.26849        |
|                   |                                      | 19218           | <i>Ptger3</i>  | -1.17597        |
|                   |                                      | 21336           | <i>Tacr1</i>   | -1.16015        |
|                   |                                      | 11542           | <i>Adora3</i>  | -1.12328        |
|                   |                                      | 59289           | <i>Ackr2</i>   | -1.106          |
|                   |                                      | 12774           | <i>Ccr5</i>    | -1.06964        |
|                   |                                      | 19222           | <i>Ptgir</i>   | -1.06711        |
|                   |                                      | 56744           | <i>Pf4</i>     | -1.01392        |
|                   |                                      | 14764           | <i>Ptgdr2</i>  | -0.99233        |
|                   |                                      | 78134           | <i>Lpar4</i>   | -0.98779        |
|                   |                                      | 14539           | <i>Opn1mw</i>  | -0.9569         |
| <b>12062</b>      | <i>Bdkrb2</i>                        | <b>-0.94312</b> |                |                 |
| 321020            | <i>Fpr-rs6</i>                       | -0.93244        |                |                 |
| 20308             | <i>Ccl9</i>                          | -0.9276         |                |                 |
| 13617             | <i>Ednra</i>                         | -0.86901        |                |                 |
| 11555             | <i>Adrb2</i>                         | -0.84979        |                |                 |

|  |                     |               |               |                 |
|--|---------------------|---------------|---------------|-----------------|
|  |                     | 11540         | Adora2a       | -0.8378         |
|  |                     | 54199         | Ccr12         | -0.76284        |
|  |                     | 319197        | Gpr4          | -0.74029        |
|  |                     | 68039         | Nmb           | -0.72562        |
|  |                     | 19204         | Ptafr         | -0.72302        |
|  |                     | 14739         | S1pr2         | -0.68506        |
|  |                     | 12267         | C3ar1         | -0.68227        |
|  |                     | 19217         | Ptger2        | -0.65162        |
|  |                     | 1E+08         | Gm20878       | -0.60711        |
|  |                     | 12061         | Bdkrb1        | -0.60327        |
|  |                     | <b>12672</b>  | <b>Chrm4</b>  | <b>0.91934</b>  |
|  |                     | <b>12802</b>  | <b>Cnr2</b>   | <b>0.93971</b>  |
|  |                     | <b>280287</b> | <b>Kiss1</b>  | <b>0.944924</b> |
|  |                     | <b>20208</b>  | <b>Saa1</b>   | <b>0.949254</b> |
|  |                     | <b>15562</b>  | <b>Htr4</b>   | <b>0.991937</b> |
|  |                     | <b>20605</b>  | <b>Sstr1</b>  | <b>1.048219</b> |
|  |                     | <b>13051</b>  | <b>Cx3cr1</b> | <b>1.128915</b> |
|  |                     | <b>107221</b> | <b>Ffar4</b>  | <b>1.192343</b> |
|  |                     | <b>21337</b>  | <b>Tacr2</b>  | <b>1.265931</b> |
|  |                     | <b>12000</b>  | <b>Avpr2</b>  | <b>1.346946</b> |
|  |                     | <b>14063</b>  | <b>F2rl1</b>  | <b>1.373368</b> |
|  |                     | <b>16963</b>  | <b>Xcl1</b>   | <b>1.565947</b> |
|  |                     | <b>18387</b>  | <b>Oprk1</b>  | <b>1.723827</b> |
|  |                     | <b>56838</b>  | <b>Ccl28</b>  | <b>1.79597</b>  |
|  |                     | <b>216749</b> | <b>Nmur2</b>  | <b>1.868133</b> |
|  |                     | <b>16867</b>  | <b>Lhcgr</b>  | <b>1.871822</b> |
|  |                     | <b>20209</b>  | <b>Saa2</b>   | <b>1.96164</b>  |
|  |                     | <b>14829</b>  | <b>Grpr</b>   | <b>2.004654</b> |
|  |                     | <b>574402</b> | <b>Gpr17</b>  | <b>2.109197</b> |
|  |                     | <b>233079</b> | <b>Ffar2</b>  | <b>2.134441</b> |
|  |                     | <b>13615</b>  | <b>Edn2</b>   | <b>2.907491</b> |
|  | GPCR ligand binding | 20311         | Cxcl5         | -4.34495        |
|  |                     | 14825         | Cxcl1         | -3.66321        |
|  |                     | 12765         | Cxcr2         | -3.17533        |
|  |                     | 14293         | Fpr1          | -3.03344        |
|  |                     | 12310         | Calca         | -2.88368        |
|  |                     | 381489        | Rxfp1         | -2.58548        |
|  |                     | 14289         | Fpr2          | -2.50436        |
|  |                     | 20306         | Ccl7          | -2.30947        |
|  |                     | 109648        | Npy           | -2.19308        |
|  |                     | 30878         | Apln          | -2.06475        |



|  |  |        |          |          |
|--|--|--------|----------|----------|
|  |  | 16995  | Ltb4r1   | -1.87125 |
|  |  | 11541  | Adora2b  | -1.82001 |
|  |  | 20303  | Ccl4     | -1.80734 |
|  |  | 12273  | C5ar1    | -1.78012 |
|  |  | 18610  | Pdyn     | -1.69401 |
|  |  | 80885  | Hcar2    | -1.60399 |
|  |  | 12778  | Ackr3    | -1.56997 |
|  |  | 11535  | Adm      | -1.47588 |
|  |  | 54140  | Avpr1a   | -1.40933 |
|  |  | 19220  | Ptgfr    | -1.35934 |
|  |  | 22044  | Trh      | -1.26849 |
|  |  | 19218  | Ptger3   | -1.17597 |
|  |  | 21336  | Tacr1    | -1.16015 |
|  |  | 574417 | Tas2r137 | -1.1489  |
|  |  | 19227  | Pthlh    | -1.14587 |
|  |  | 11542  | Adora3   | -1.12328 |
|  |  | 56089  | Ramp3    | -1.11478 |
|  |  | 59289  | Ackr2    | -1.106   |
|  |  | 12774  | Ccr5     | -1.06964 |
|  |  | 19222  | Ptgir    | -1.06711 |
|  |  | 56744  | Pf4      | -1.01392 |
|  |  | 14764  | Ptgdr2   | -0.99233 |
|  |  | 78134  | Lpar4    | -0.98779 |
|  |  | 14539  | Opn1mw   | -0.9569  |
|  |  | 12062  | Bdkrb2   | -0.94312 |
|  |  | 321020 | Fpr-rs6  | -0.93244 |
|  |  | 20308  | Ccl9     | -0.9276  |
|  |  | 14366  | Fzd4     | -0.87772 |
|  |  | 13617  | Ednra    | -0.86901 |
|  |  | 11555  | Adrb2    | -0.84979 |
|  |  | 11540  | Adora2a  | -0.8378  |
|  |  | 12922  | Crhr2    | -0.83428 |
|  |  | 54409  | Ramp2    | -0.79815 |
|  |  | 54199  | Ccl2     | -0.76284 |
|  |  | 319197 | Gpr4     | -0.74029 |
|  |  | 14369  | Fzd7     | -0.735   |
|  |  | 68039  | Nmb      | -0.72562 |
|  |  | 19204  | Ptafr    | -0.72302 |
|  |  | 14709  | Gng8     | -0.72016 |
|  |  | 14739  | S1pr2    | -0.68506 |
|  |  | 12267  | C3ar1    | -0.68227 |

|  |                                  |               |                |                 |
|--|----------------------------------|---------------|----------------|-----------------|
|  |                                  | 19217         | <i>Ptger2</i>  | -0.65162        |
|  |                                  | 14708         | <i>Gng7</i>    | -0.64044        |
|  |                                  | 19228         | <i>Pth1r</i>   | -0.61805        |
|  |                                  | 1E+08         | <i>Gm20878</i> | -0.60711        |
|  |                                  | 12061         | <i>Bdkrb1</i>  | -0.60327        |
|  |                                  | <b>12672</b>  | <b>Chrm4</b>   | <b>0.91934</b>  |
|  |                                  | <b>12802</b>  | <b>Cnr2</b>    | <b>0.93971</b>  |
|  |                                  | <b>280287</b> | <b>Kiss1</b>   | <b>0.944924</b> |
|  |                                  | <b>20208</b>  | <b>Saa1</b>    | <b>0.949254</b> |
|  |                                  | <b>15562</b>  | <b>Htr4</b>    | <b>0.991937</b> |
|  |                                  | <b>20605</b>  | <b>Sstr1</b>   | <b>1.048219</b> |
|  |                                  | <b>13051</b>  | <b>Cx3cr1</b>  | <b>1.128915</b> |
|  |                                  | <b>107221</b> | <b>Ffar4</b>   | <b>1.192343</b> |
|  |                                  | <b>21337</b>  | <b>Tacr2</b>   | <b>1.265931</b> |
|  |                                  | <b>14367</b>  | <b>Fzd5</b>    | <b>1.338752</b> |
|  |                                  | <b>12000</b>  | <b>Avpr2</b>   | <b>1.346946</b> |
|  |                                  | <b>14063</b>  | <b>F2rl1</b>   | <b>1.373368</b> |
|  |                                  | <b>16963</b>  | <b>Xcl1</b>    | <b>1.565947</b> |
|  |                                  | <b>18387</b>  | <b>Oprk1</b>   | <b>1.723827</b> |
|  |                                  | <b>56838</b>  | <b>Ccl28</b>   | <b>1.79597</b>  |
|  |                                  | <b>216749</b> | <b>Nmur2</b>   | <b>1.868133</b> |
|  |                                  | <b>16867</b>  | <b>Lhcgr</b>   | <b>1.871822</b> |
|  |                                  | <b>20287</b>  | <b>Sct</b>     | <b>1.903349</b> |
|  |                                  | <b>20209</b>  | <b>Saa2</b>    | <b>1.96164</b>  |
|  |                                  | <b>14829</b>  | <b>Grpr</b>    | <b>2.004654</b> |
|  |                                  | <b>574402</b> | <b>Gpr17</b>   | <b>2.109197</b> |
|  |                                  | <b>233079</b> | <b>Ffar2</b>   | <b>2.134441</b> |
|  |                                  | <b>13615</b>  | <b>Edn2</b>    | <b>2.907491</b> |
|  | Peptide ligand-binding receptors | <i>20311</i>  | <i>Cxcl5</i>   | -4.34495        |
|  |                                  | 14825         | <i>Cxcl1</i>   | -3.66321        |
|  |                                  | 12765         | <i>Cxcr2</i>   | -3.17533        |
|  |                                  | 14293         | <i>Fpr1</i>    | -3.03344        |
|  |                                  | 381489        | <i>Rxfp1</i>   | -2.58548        |
|  |                                  | 14289         | <i>Fpr2</i>    | -2.50436        |
|  |                                  | 20306         | <i>Ccl7</i>    | -2.30947        |
|  |                                  | 109648        | <i>Npy</i>     | -2.19308        |
|  |                                  | 30878         | <i>Apln</i>    | -2.06475        |
|  |                                  | 20303         | <i>Ccl4</i>    | -1.80734        |
|  |                                  | 12273         | <i>C5ar1</i>   | -1.78012        |
|  |                                  | 18610         | <i>Pdyn</i>    | -1.69401        |
|  |                                  | 12778         | <i>Ackr3</i>   | -1.56997        |

|  |                               |               |               |                 |
|--|-------------------------------|---------------|---------------|-----------------|
|  |                               | 54140         | Avpr1a        | -1.40933        |
|  |                               | 22044         | Trh           | -1.26849        |
|  |                               | 21336         | Tacr1         | -1.16015        |
|  |                               | 59289         | Ackr2         | -1.106          |
|  |                               | 12774         | Ccr5          | -1.06964        |
|  |                               | 56744         | Pf4           | -1.01392        |
|  |                               | 12062         | Bdkrb2        | -0.94312        |
|  |                               | 321020        | Fpr-rs6       | -0.93244        |
|  |                               | 20308         | Ccl9          | -0.9276         |
|  |                               | 13617         | Ednra         | -0.86901        |
|  |                               | 54199         | Ccl2          | -0.76284        |
|  |                               | 68039         | Nmb           | -0.72562        |
|  |                               | 12267         | C3ar1         | -0.68227        |
|  |                               | 100041579     | Gm20878       | -0.60711        |
|  |                               | 12061         | Bdkrb1        | -0.60327        |
|  |                               | <b>280287</b> | <b>Kiss1</b>  | <b>0.944924</b> |
|  |                               | <b>20208</b>  | <b>Saa1</b>   | <b>0.949254</b> |
|  |                               | <b>20605</b>  | <b>Sstr1</b>  | <b>1.048219</b> |
|  |                               | <b>13051</b>  | <b>Cx3cr1</b> | <b>1.128915</b> |
|  |                               | <b>21337</b>  | <b>Tacr2</b>  | <b>1.265931</b> |
|  |                               | <b>12000</b>  | <b>Avpr2</b>  | <b>1.346946</b> |
|  |                               | <b>14063</b>  | <b>F2rl1</b>  | <b>1.373368</b> |
|  |                               | <b>16963</b>  | <b>Xcl1</b>   | <b>1.565947</b> |
|  |                               | <b>18387</b>  | <b>Oprk1</b>  | <b>1.723827</b> |
|  |                               | <b>56838</b>  | <b>Ccl28</b>  | <b>1.79597</b>  |
|  |                               | <b>216749</b> | <b>Nmur2</b>  | <b>1.868133</b> |
|  |                               | <b>20209</b>  | <b>Saa2</b>   | <b>1.96164</b>  |
|  |                               | <b>14829</b>  | <b>Grpr</b>   | <b>2.004654</b> |
|  |                               | <b>13615</b>  | <b>Edn2</b>   | <b>2.907491</b> |
|  | G alpha (s) signalling events | 12310         | Calca         | -2.88368        |
|  |                               | 381489        | Rxfp1         | -2.58548        |
|  |                               | 11541         | Adora2b       | -1.82001        |
|  |                               | 11535         | Adm           | -1.47588        |
|  |                               | 18578         | Pde4b         | -1.32826        |
|  |                               | 23984         | Pde10a        | -1.18192        |
|  |                               | 104110        | Adcy4         | -1.16978        |
|  |                               | 19227         | Pthlh         | -1.14587        |
|  |                               | 56089         | Ramp3         | -1.11478        |
|  |                               | 19222         | Ptgir         | -1.06711        |
|  |                               | 210044        | Adcy2         | -0.99756        |
|  |                               | 11555         | Adrb2         | -0.84979        |

|  |                   |               |              |                 |
|--|-------------------|---------------|--------------|-----------------|
|  |                   | 11540         | Adora2a      | -0.8378         |
|  |                   | 12922         | Crhr2        | -0.83428        |
|  |                   | 54409         | Ramp2        | -0.79815        |
|  |                   | 19217         | Ptger2       | -0.65162        |
|  |                   | 18577         | Pde4a        | -0.62155        |
|  |                   | 19228         | Pth1r        | -0.61805        |
|  |                   | <b>54611</b>  | <b>Pde3a</b> | <b>0.664187</b> |
|  |                   | <b>207728</b> | <b>Pde2a</b> | <b>0.669864</b> |
|  |                   | <b>18583</b>  | <b>Pde7a</b> | <b>0.848634</b> |
|  |                   | <b>11512</b>  | <b>Adcy6</b> | <b>0.967657</b> |
|  |                   | <b>15562</b>  | <b>Htr4</b>  | <b>0.991937</b> |
|  |                   | <b>22354</b>  | <b>Vipr1</b> | <b>0.99492</b>  |
|  |                   | <b>12000</b>  | <b>Avpr2</b> | <b>1.346946</b> |
|  |                   | <b>16867</b>  | <b>Lhcgr</b> | <b>1.871822</b> |
|  |                   | <b>20287</b>  | <b>Sct</b>   | <b>1.903349</b> |
|  | Non-odorant GPCRs | 12765         | Cxcr2        | -3.17533        |
|  |                   | 14293         | Fpr1         | -3.03344        |
|  |                   | 381489        | Rxfp1        | -2.58548        |
|  |                   | 16995         | Ltb4r1       | -1.87125        |
|  |                   | 11541         | Adora2b      | -1.82001        |
|  |                   | 12273         | C5ar1        | -1.78012        |
|  |                   | 80885         | Hcar2        | -1.60399        |
|  |                   | 12778         | Ackr3        | -1.56997        |
|  |                   | 13349         | Ackr1        | -1.56424        |
|  |                   | 64297         | Gprc5b       | -1.45985        |
|  |                   | 54140         | Avpr1a       | -1.40933        |
|  |                   | 19220         | Ptgfr        | -1.35934        |
|  |                   | 12772         | Ccr2         | -1.18817        |
|  |                   | 19218         | Ptger3       | -1.17597        |
|  |                   | 21336         | Tacr1        | -1.16015        |
|  |                   | 574417        | Tas2r137     | -1.1489         |
|  |                   | 11542         | Adora3       | -1.12328        |
|  |                   | 59289         | Ackr2        | -1.106          |
|  |                   | 19222         | Ptgir        | -1.06711        |
|  |                   | 78134         | Lpar4        | -0.98779        |
|  |                   | 12776         | Ccr8         | -0.96612        |
|  |                   | 12062         | Bdkrb2       | -0.94312        |
|  |                   | 14366         | Fzd4         | -0.87772        |
|  |                   | 13617         | Ednra        | -0.86901        |
|  |                   | 14368         | Fzd6         | -0.86552        |
|  |                   | 11555         | Adrb2        | -0.84979        |

|                        |                                          |               |               |                 |
|------------------------|------------------------------------------|---------------|---------------|-----------------|
|                        |                                          | 11540         | Adora2a       | -0.8378         |
|                        |                                          | 12922         | Crhr2         | -0.83428        |
|                        |                                          | 54199         | Ccrl2         | -0.76284        |
|                        |                                          | 14369         | Fzd7          | -0.735          |
|                        |                                          | 19204         | Ptafr         | -0.72302        |
|                        |                                          | 14739         | S1pr2         | -0.68506        |
|                        |                                          | 12267         | C3ar1         | -0.68227        |
|                        |                                          | 19217         | Ptger2        | -0.65162        |
|                        |                                          | 19228         | Pth1r         | -0.61805        |
|                        |                                          | 12061         | Bdkrb1        | -0.60327        |
|                        |                                          | <b>12672</b>  | <b>Chrm4</b>  | <b>0.91934</b>  |
|                        |                                          | <b>12802</b>  | <b>Cnr2</b>   | <b>0.93971</b>  |
|                        |                                          | <b>15562</b>  | <b>Htr4</b>   | <b>0.991937</b> |
|                        |                                          | <b>22354</b>  | <b>Vipr1</b>  | <b>0.99492</b>  |
|                        |                                          | <b>20605</b>  | <b>Sstr1</b>  | <b>1.048219</b> |
|                        |                                          | <b>13051</b>  | <b>Cx3cr1</b> | <b>1.128915</b> |
|                        |                                          | <b>107221</b> | <b>Ffar4</b>  | <b>1.192343</b> |
|                        |                                          | <b>236781</b> | <b>Gpr119</b> | <b>1.210129</b> |
|                        |                                          | <b>21337</b>  | <b>Tacr2</b>  | <b>1.265931</b> |
|                        |                                          | <b>14367</b>  | <b>Fzd5</b>   | <b>1.338752</b> |
|                        |                                          | <b>12000</b>  | <b>Avpr2</b>  | <b>1.346946</b> |
|                        |                                          | <b>14063</b>  | <b>F2rl1</b>  | <b>1.373368</b> |
|                        |                                          | <b>18387</b>  | <b>Oprk1</b>  | <b>1.723827</b> |
|                        |                                          | <b>216749</b> | <b>Nmur2</b>  | <b>1.868133</b> |
|                        |                                          | <b>16867</b>  | <b>Lhcgr</b>  | <b>1.871822</b> |
|                        |                                          | <b>14829</b>  | <b>Grpr</b>   | <b>2.004654</b> |
|                        |                                          | <b>574402</b> | <b>Gpr17</b>  | <b>2.109197</b> |
|                        |                                          | <b>23832</b>  | <b>Xcr1</b>   | <b>2.111892</b> |
|                        |                                          | <b>233079</b> | <b>Ffar2</b>  | <b>2.134441</b> |
|                        | Antagonism of Activin by Follistatin     | 16324         | Inhbb         | -2.62677        |
|                        |                                          | 16323         | Inhba         | -2.3647         |
|                        |                                          | 14313         | Fst           | -1.657402       |
|                        |                                          | 83554         | Fstl3         | -1.079992       |
| Xenobiotics metabolism | Phase 1 - Functionalization of compounds | 13088         | Cyp2b10       | -3.70625        |
|                        |                                          | 13123         | Cyp7b1        | -1.44706        |
|                        |                                          | 19223         | Ptgis         | -1.18808        |
|                        |                                          | 14261         | Fmo1          | -0.93541        |
|                        |                                          | 228608        | Smox          | -0.64588        |
|                        |                                          | 212503        | Paox          | -0.60891        |
|                        |                                          | 11669         | Aldh2         | 0.818158        |
|                        |                                          | 230459        | Cyp2j13       | 0.92393         |

|  |                       |               |                |                 |
|--|-----------------------|---------------|----------------|-----------------|
|  |                       | 13110         | Cyp2j6         | 0.955546        |
|  |                       | 60525         | Acss2          | 1.046677        |
|  |                       | 68738         | Acss1          | 1.103326        |
|  |                       | 74134         | Cyp2s1         | 1.216227        |
|  |                       | 631304        | Cyp4f40        | 1.947573        |
|  |                       | 13112         | Cyp3a11        | 2.066924        |
|  |                       | 545123        | Cyp2d11        | 2.074292        |
|  |                       | 17161         | Maoa           | 2.081097        |
|  |                       | 13113         | Cyp3a13        | 2.238127        |
|  |                       | 545288        | Cyp2c67        | 2.508173        |
|  |                       | 13099         | Cyp2c40        | 2.536402        |
|  |                       | 107141        | Cyp2c50        | 2.555901        |
|  |                       | 76279         | Cyp2d26        | 2.666213        |
|  |                       | 380997        | Cyp2d12        | 2.687051        |
|  |                       | 13105         | Cyp2d9         | 2.696041        |
|  |                       | 13101         | Cyp2d10        | 2.835051        |
|  |                       | 13095         | Cyp2c29        | 3.072696        |
|  |                       | 69888         | Cyp2c66        | 3.206495        |
|  |                       | 1E+08         | Cyp2c69        | 3.276957        |
|  |                       | 64385         | Cyp4f14        | 3.873506        |
|  |                       | 72303         | Cyp2c65        | 4.136602        |
|  |                       | 72082         | Cyp2c55        | 4.559563        |
|  | Biological oxidations | 13088         | Cyp2b10        | -3.70625        |
|  |                       | 117147        | Acsm1          | -1.45708        |
|  |                       | 13123         | Cyp7b1         | -1.44706        |
|  |                       | 19223         | Ptgis          | -1.18808        |
|  |                       | 110175        | Ggct           | -1.00265        |
|  |                       | 14261         | Fmo1           | -0.93541        |
|  |                       | 228608        | Smox           | -0.64588        |
|  |                       | 212503        | Paox           | -0.60891        |
|  |                       | <b>103140</b> | <b>Gstt3</b>   | <b>0.777197</b> |
|  |                       | <b>14872</b>  | <b>Gstt2</b>   | <b>0.813855</b> |
|  |                       | <b>11669</b>  | <b>Aldh2</b>   | <b>0.818158</b> |
|  |                       | <b>17961</b>  | <b>Nat2</b>    | <b>0.824478</b> |
|  |                       | <b>22017</b>  | <b>Tpmt</b>    | <b>0.854172</b> |
|  |                       | <b>14854</b>  | <b>Gss</b>     | <b>0.871117</b> |
|  |                       | <b>94284</b>  | <b>Ugt1a6a</b> | <b>0.900385</b> |
|  |                       | <b>22235</b>  | <b>Ugdh</b>    | <b>0.911553</b> |
|  |                       | <b>230459</b> | <b>Cyp2j13</b> | <b>0.92393</b>  |
|  |                       | <b>13110</b>  | <b>Cyp2j6</b>  | <b>0.955546</b> |
|  |                       | <b>66447</b>  | <b>Mgst3</b>   | <b>0.971084</b> |

|  |             |        |         |          |
|--|-------------|--------|---------|----------|
|  |             | 60525  | Acss2   | 1.046677 |
|  |             | 68738  | Acss1   | 1.103326 |
|  |             | 74134  | Cyp2s1  | 1.216227 |
|  |             | 211666 | Mgst2   | 1.363034 |
|  |             | 20887  | Sult1a1 | 1.5804   |
|  |             | 23972  | Papss2  | 1.890541 |
|  |             | 13521  | Slc26a2 | 1.912715 |
|  |             | 631304 | Cyp4f40 | 1.947573 |
|  |             | 13112  | Cyp3a11 | 2.066924 |
|  |             | 545123 | Cyp2d11 | 2.074292 |
|  |             | 17161  | Maoa    | 2.081097 |
|  |             | 13113  | Cyp3a13 | 2.238127 |
|  |             | 545288 | Cyp2c67 | 2.508173 |
|  |             | 13099  | Cyp2c40 | 2.536402 |
|  |             | 107141 | Cyp2c50 | 2.555901 |
|  |             | 17962  | Nat3    | 2.585722 |
|  |             | 76279  | Cyp2d26 | 2.666213 |
|  |             | 380997 | Cyp2d12 | 2.687051 |
|  |             | 13105  | Cyp2d9  | 2.696041 |
|  |             | 13101  | Cyp2d10 | 2.835051 |
|  |             | 56362  | Sult1b1 | 3.038625 |
|  |             | 13095  | Cyp2c29 | 3.072696 |
|  |             | 69888  | Cyp2c66 | 3.206495 |
|  |             | 1E+08  | Cyp2c69 | 3.276957 |
|  |             | 69083  | Sult1c2 | 3.692611 |
|  |             | 64385  | Cyp4f14 | 3.873506 |
|  |             | 72303  | Cyp2c65 | 4.136602 |
|  |             | 72082  | Cyp2c55 | 4.559563 |
|  | Xenobiotics | 13088  | Cyp2b10 | -3.70625 |
|  |             | 13112  | Cyp3a11 | 2.066924 |
|  |             | 545123 | Cyp2d11 | 2.074292 |
|  |             | 13113  | Cyp3a13 | 2.238127 |
|  |             | 545288 | Cyp2c67 | 2.508173 |
|  |             | 13099  | Cyp2c40 | 2.536402 |
|  |             | 107141 | Cyp2c50 | 2.555901 |
|  |             | 76279  | Cyp2d26 | 2.666213 |
|  |             | 380997 | Cyp2d12 | 2.687051 |
|  |             | 13105  | Cyp2d9  | 2.696041 |
|  |             | 13101  | Cyp2d10 | 2.835051 |
|  |             | 13095  | Cyp2c29 | 3.072696 |
|  |             | 69888  | Cyp2c66 | 3.206495 |

|  |                                              |                       |                 |                 |                 |
|--|----------------------------------------------|-----------------------|-----------------|-----------------|-----------------|
|  |                                              | <b>1E+08</b>          | <b>Cyp2c69</b>  | <b>3.276957</b> |                 |
|  |                                              | <b>72303</b>          | <b>Cyp2c65</b>  | <b>4.136602</b> |                 |
|  |                                              | <b>72082</b>          | <b>Cyp2c55</b>  | <b>4.559563</b> |                 |
|  | Cytochrome P450 - arranged by substrate type | 13088                 | Cyp2b10         | -3.70625        |                 |
|  |                                              | 13123                 | Cyp7b1          | -1.44706        |                 |
|  |                                              | 19223                 | Ptgis           | -1.18808        |                 |
|  |                                              | <b>230459</b>         | <b>Cyp2j13</b>  | <b>0.92393</b>  |                 |
|  |                                              | <b>13110</b>          | <b>Cyp2j6</b>   | <b>0.955546</b> |                 |
|  |                                              | <b>74134</b>          | <b>Cyp2s1</b>   | <b>1.216227</b> |                 |
|  |                                              | <b>631304</b>         | <b>Cyp4f40</b>  | <b>1.947573</b> |                 |
|  |                                              | <b>13112</b>          | <b>Cyp3a11</b>  | <b>2.066924</b> |                 |
|  |                                              | <b>545123</b>         | <b>Cyp2d11</b>  | <b>2.074292</b> |                 |
|  |                                              | <b>13113</b>          | <b>Cyp3a13</b>  | <b>2.238127</b> |                 |
|  |                                              | <b>545288</b>         | <b>Cyp2c67</b>  | <b>2.508173</b> |                 |
|  |                                              | <b>13099</b>          | <b>Cyp2c40</b>  | <b>2.536402</b> |                 |
|  |                                              | <b>107141</b>         | <b>Cyp2c50</b>  | <b>2.555901</b> |                 |
|  |                                              | <b>76279</b>          | <b>Cyp2d26</b>  | <b>2.666213</b> |                 |
|  |                                              | <b>380997</b>         | <b>Cyp2d12</b>  | <b>2.687051</b> |                 |
|  |                                              | <b>13105</b>          | <b>Cyp2d9</b>   | <b>2.696041</b> |                 |
|  |                                              | <b>13101</b>          | <b>Cyp2d10</b>  | <b>2.835051</b> |                 |
|  |                                              | <b>13095</b>          | <b>Cyp2c29</b>  | <b>3.072696</b> |                 |
|  |                                              | <b>69888</b>          | <b>Cyp2c66</b>  | <b>3.206495</b> |                 |
|  |                                              | <b>1E+08</b>          | <b>Cyp2c69</b>  | <b>3.276957</b> |                 |
|  |                                              | <b>64385</b>          | <b>Cyp4f14</b>  | <b>3.873506</b> |                 |
|  |                                              | <b>72303</b>          | <b>Cyp2c65</b>  | <b>4.136602</b> |                 |
|  |                                              | <b>72082</b>          | <b>Cyp2c55</b>  | <b>4.559563</b> |                 |
|  |                                              | bupropion degradation | 13088           | Cyp2b10         | -3.70625        |
|  |                                              |                       | <b>13110</b>    | <b>Cyp2j6</b>   | <b>0.955546</b> |
|  |                                              |                       | <b>74134</b>    | <b>Cyp2s1</b>   | <b>1.216227</b> |
|  |                                              |                       | <b>13112</b>    | <b>Cyp3a11</b>  | <b>2.066924</b> |
|  | <b>545123</b>                                |                       | <b>Cyp2d11</b>  | <b>2.074292</b> |                 |
|  | <b>13113</b>                                 |                       | <b>Cyp3a13</b>  | <b>2.238127</b> |                 |
|  | <b>13099</b>                                 |                       | <b>Cyp2c40</b>  | <b>2.536402</b> |                 |
|  | <b>107141</b>                                |                       | <b>Cyp2c50</b>  | <b>2.555901</b> |                 |
|  | <b>76279</b>                                 |                       | <b>Cyp2d26</b>  | <b>2.666213</b> |                 |
|  | <b>13105</b>                                 |                       | <b>Cyp2d9</b>   | <b>2.696041</b> |                 |
|  | <b>13101</b>                                 |                       | <b>Cyp2d10</b>  | <b>2.835051</b> |                 |
|  | <b>13095</b>                                 |                       | <b>Cyp2c29</b>  | <b>3.072696</b> |                 |
|  | <b>72303</b>                                 |                       | <b>Cyp2c65</b>  | <b>4.136602</b> |                 |
|  | <b>72082</b>                                 | <b>Cyp2c55</b>        | <b>4.559563</b> |                 |                 |
|  | nicotine degradation III                     | 13088                 | Cyp2b10         | -3.70625        |                 |



|  |                                              |        |         |          |
|--|----------------------------------------------|--------|---------|----------|
|  |                                              | 94284  | Ugt1a6a | 0.900385 |
|  |                                              | 13110  | Cyp2j6  | 0.955546 |
|  |                                              | 74134  | Cyp2s1  | 1.216227 |
|  |                                              | 13112  | Cyp3a11 | 2.066924 |
|  |                                              | 545123 | Cyp2d11 | 2.074292 |
|  |                                              | 13113  | Cyp3a13 | 2.238127 |
|  |                                              | 13099  | Cyp2c40 | 2.536402 |
|  |                                              | 107141 | Cyp2c50 | 2.555901 |
|  |                                              | 76279  | Cyp2d26 | 2.666213 |
|  |                                              | 13105  | Cyp2d9  | 2.696041 |
|  |                                              | 13101  | Cyp2d10 | 2.835051 |
|  |                                              | 13095  | Cyp2c29 | 3.072696 |
|  |                                              | 72303  | Cyp2c65 | 4.136602 |
|  |                                              | 72082  | Cyp2c55 | 4.559563 |
|  | Metabolism of xenobiotics by cytochrome P450 | 13088  | Cyp2b10 | -3.70625 |
|  |                                              | 109857 | Cbr3    | -1.27599 |
|  |                                              | 15483  | Hsd11b1 | -0.9844  |
|  |                                              | 103140 | Gstt3   | 0.777197 |
|  |                                              | 14872  | Gstt2   | 0.813855 |
|  |                                              | 94284  | Ugt1a6a | 0.900385 |
|  |                                              | 66447  | Mgst3   | 0.971084 |
|  |                                              | 94215  | Ugt2a1  | 0.97448  |
|  |                                              | 76263  | Gstk1   | 1.087932 |
|  |                                              | 74134  | Cyp2s1  | 1.216227 |
|  |                                              | 394430 | Ugt1a10 | 1.254373 |
|  |                                              | 211666 | Mgst2   | 1.363034 |
|  |                                              | 13112  | Cyp3a11 | 2.066924 |
|  |                                              | 13113  | Cyp3a13 | 2.238127 |
|  |                                              | 13099  | Cyp2c40 | 2.536402 |
|  |                                              | 107141 | Cyp2c50 | 2.555901 |
|  |                                              | 76279  | Cyp2d26 | 2.666213 |
|  |                                              | 13105  | Cyp2d9  | 2.696041 |
|  |                                              | 100559 | Ugt2b38 | 2.824694 |
|  |                                              | 13101  | Cyp2d10 | 2.835051 |
|  |                                              | 13095  | Cyp2c29 | 3.072696 |
|  |                                              | 69888  | Cyp2c66 | 3.206495 |
|  |                                              | 433247 | Cyp2c68 | 3.274499 |
|  |                                              | 100727 | Ugt2b34 | 3.486643 |
|  |                                              | 72303  | Cyp2c65 | 4.136602 |
|  |                                              | 72082  | Cyp2c55 | 4.559563 |
|  | Drug metabolism - cytochrome P450            | 13088  | Cyp2b10 | -3.70625 |

|  |                                 |        |         |          |
|--|---------------------------------|--------|---------|----------|
|  |                                 | 14261  | Fmo1    | -0.93541 |
|  |                                 | 103140 | Gstt3   | 0.777197 |
|  |                                 | 14872  | Gstt2   | 0.813855 |
|  |                                 | 94284  | Ugt1a6a | 0.900385 |
|  |                                 | 66447  | Mgst3   | 0.971084 |
|  |                                 | 94215  | Ugt2a1  | 0.97448  |
|  |                                 | 76263  | Gstk1   | 1.087932 |
|  |                                 | 394430 | Ugt1a10 | 1.254373 |
|  |                                 | 211666 | Mgst2   | 1.363034 |
|  |                                 | 13112  | Cyp3a11 | 2.066924 |
|  |                                 | 17161  | Maoa    | 2.081097 |
|  |                                 | 13113  | Cyp3a13 | 2.238127 |
|  |                                 | 13099  | Cyp2c40 | 2.536402 |
|  |                                 | 107141 | Cyp2c50 | 2.555901 |
|  |                                 | 76279  | Cyp2d26 | 2.666213 |
|  |                                 | 13105  | Cyp2d9  | 2.696041 |
|  |                                 | 100559 | Ugt2b38 | 2.824694 |
|  |                                 | 13101  | Cyp2d10 | 2.835051 |
|  |                                 | 13095  | Cyp2c29 | 3.072696 |
|  |                                 | 69888  | Cyp2c66 | 3.206495 |
|  |                                 | 433247 | Cyp2c68 | 3.274499 |
|  |                                 | 100727 | Ugt2b34 | 3.486643 |
|  |                                 | 72303  | Cyp2c65 | 4.136602 |
|  |                                 | 72082  | Cyp2c55 | 4.559563 |
|  | nicotine degradation II         | 13088  | Cyp2b10 | -3.70625 |
|  |                                 | 14261  | Fmo1    | -0.93541 |
|  |                                 | 94284  | Ugt1a6a | 0.900385 |
|  |                                 | 13110  | Cyp2j6  | 0.955546 |
|  |                                 | 74134  | Cyp2s1  | 1.216227 |
|  |                                 | 13112  | Cyp3a11 | 2.066924 |
|  |                                 | 545123 | Cyp2d11 | 2.074292 |
|  |                                 | 13113  | Cyp3a13 | 2.238127 |
|  |                                 | 13099  | Cyp2c40 | 2.536402 |
|  |                                 | 107141 | Cyp2c50 | 2.555901 |
|  |                                 | 76279  | Cyp2d26 | 2.666213 |
|  |                                 | 13105  | Cyp2d9  | 2.696041 |
|  |                                 | 13101  | Cyp2d10 | 2.835051 |
|  |                                 | 13095  | Cyp2c29 | 3.072696 |
|  |                                 | 72303  | Cyp2c65 | 4.136602 |
|  |                                 | 72082  | Cyp2c55 | 4.559563 |
|  | Drug metabolism - other enzymes | 80914  | Uck2    | -0.66786 |

|            |                                                    |               |                |                 |
|------------|----------------------------------------------------|---------------|----------------|-----------------|
|            |                                                    | <b>17961</b>  | <b>Nat2</b>    | <b>0.824478</b> |
|            |                                                    | <b>22017</b>  | <b>Tpmt</b>    | <b>0.854172</b> |
|            |                                                    | <b>94284</b>  | <b>Ugt1a6a</b> | <b>0.900385</b> |
|            |                                                    | <b>103149</b> | <b>Upb1</b>    | <b>0.966679</b> |
|            |                                                    | <b>94215</b>  | <b>Ugt2a1</b>  | <b>0.97448</b>  |
|            |                                                    | <b>72269</b>  | <b>Cda</b>     | <b>1.094769</b> |
|            |                                                    | <b>76654</b>  | <b>Upp2</b>    | <b>1.136651</b> |
|            |                                                    | <b>394430</b> | <b>Ugt1a10</b> | <b>1.254373</b> |
|            |                                                    | <b>13112</b>  | <b>Cyp3a11</b> | <b>2.066924</b> |
|            |                                                    | <b>13113</b>  | <b>Cyp3a13</b> | <b>2.238127</b> |
|            |                                                    | <b>17962</b>  | <b>Nat3</b>    | <b>2.585722</b> |
|            |                                                    | <b>100559</b> | <b>Ugt2b38</b> | <b>2.824694</b> |
|            |                                                    | <b>102022</b> | <b>Ces2a</b>   | <b>2.836396</b> |
|            |                                                    | <b>234673</b> | <b>Ces2e</b>   | <b>3.257719</b> |
|            |                                                    | <b>100727</b> | <b>Ugt2b34</b> | <b>3.486643</b> |
|            |                                                    | <b>234671</b> | <b>Ces2c</b>   | <b>3.511133</b> |
| Metabolism | Nuclear receptors in lipid metabolism and toxicity | 13088         | Cyp2b10        | -3.70625        |
|            |                                                    | 19411         | Rarg           | -1.03301        |
|            |                                                    | 11303         | Abca1          | -0.91568        |
|            |                                                    | 11307         | Abcg1          | -0.88402        |
|            |                                                    | <b>19015</b>  | <b>Ppard</b>   | <b>0.729502</b> |
|            |                                                    | <b>19013</b>  | <b>Ppara</b>   | <b>1.763983</b> |
|            |                                                    | <b>76408</b>  | <b>Abcc3</b>   | <b>1.189916</b> |
|            |                                                    | <b>18670</b>  | <b>Abcb4</b>   | <b>1.326175</b> |
|            |                                                    | <b>18671</b>  | <b>Abcb1a</b>  | <b>1.373398</b> |
|            |                                                    | <b>20186</b>  | <b>Nr1h4</b>   | <b>1.42261</b>  |
|            |                                                    | <b>19016</b>  | <b>Pparg</b>   | <b>1.539321</b> |
|            |                                                    | <b>22337</b>  | <b>Vdr</b>     | <b>1.692396</b> |
|            |                                                    | <b>18171</b>  | <b>Nr1i2</b>   | <b>2.63852</b>  |
|            | Prostaglandin Synthesis and Regulation             | 22287         | Scgb1a1        | -1.63652        |
|            |                                                    | 19225         | Ptgs2          | -1.60905        |
|            |                                                    | 19220         | Ptgfr          | -1.35934        |
|            |                                                    | 19223         | Ptgis          | -1.18808        |
|            |                                                    | 19218         | Ptger3         | -1.17597        |
|            |                                                    | 19222         | Ptgir          | -1.06711        |
|            |                                                    | 15483         | Hsd11b1        | -0.9844         |
|            |                                                    | 13617         | Ednra          | -0.86901        |
|            |                                                    | 19215         | Ptgds          | -0.6629         |
|            |                                                    | <i>19217</i>  | <i>Ptger2</i>  | <i>-0.65162</i> |
|            |                                                    | <b>11746</b>  | <b>Anxa4</b>   | <b>0.932985</b> |
|            |                                                    | <b>15446</b>  | <b>Hpgd</b>    | <b>1.637187</b> |

|                                                                   |  |               |                 |                 |
|-------------------------------------------------------------------|--|---------------|-----------------|-----------------|
|                                                                   |  | <b>15484</b>  | <b>Hsd11b2</b>  | <b>2.433383</b> |
| Synthesis of epoxy (EET) and dihydroxyeicosatrienoic acids (DHET) |  | <b>230459</b> | <b>Cyp2j13</b>  | <b>0.92393</b>  |
|                                                                   |  | <b>13110</b>  | <b>Cyp2j6</b>   | <b>0.955546</b> |
|                                                                   |  | <b>545288</b> | <b>Cyp2c67</b>  | <b>2.508173</b> |
|                                                                   |  | <b>13099</b>  | <b>Cyp2c40</b>  | <b>2.536402</b> |
|                                                                   |  | <b>107141</b> | <b>Cyp2c50</b>  | <b>2.555901</b> |
|                                                                   |  | <b>13095</b>  | <b>Cyp2c29</b>  | <b>3.072696</b> |
|                                                                   |  | <b>69888</b>  | <b>Cyp2c66</b>  | <b>3.206495</b> |
|                                                                   |  | <b>1E+08</b>  | <b>Cyp2c69</b>  | <b>3.276957</b> |
|                                                                   |  | <b>72303</b>  | <b>Cyp2c65</b>  | <b>4.136602</b> |
|                                                                   |  | <b>72082</b>  | <b>Cyp2c55</b>  | <b>4.559563</b> |
| Synthesis of (16-20)-hydroxyeicosatetraenoic acids (HETE)         |  | <b>631304</b> | <b>Cyp4f40</b>  | <b>1.947573</b> |
|                                                                   |  | <b>545288</b> | <b>Cyp2c67</b>  | <b>2.508173</b> |
|                                                                   |  | <b>13099</b>  | <b>Cyp2c40</b>  | <b>2.536402</b> |
|                                                                   |  | <b>107141</b> | <b>Cyp2c50</b>  | <b>2.555901</b> |
|                                                                   |  | <b>13095</b>  | <b>Cyp2c29</b>  | <b>3.072696</b> |
|                                                                   |  | <b>69888</b>  | <b>Cyp2c66</b>  | <b>3.206495</b> |
|                                                                   |  | <b>1E+08</b>  | <b>Cyp2c69</b>  | <b>3.276957</b> |
|                                                                   |  | <b>64385</b>  | <b>Cyp4f14</b>  | <b>3.873506</b> |
|                                                                   |  | <b>72303</b>  | <b>Cyp2c65</b>  | <b>4.136602</b> |
|                                                                   |  | <b>72082</b>  | <b>Cyp2c55</b>  | <b>4.559563</b> |
| Ascorbate and aldarate metabolism                                 |  | <b>11671</b>  | <b>Aldh3a2</b>  | <b>0.779767</b> |
|                                                                   |  | <b>11669</b>  | <b>Aldh2</b>    | <b>0.818158</b> |
|                                                                   |  | <b>94284</b>  | <b>Ugt1a6a</b>  | <b>0.900385</b> |
|                                                                   |  | <b>22235</b>  | <b>Ugdh</b>     | <b>0.911553</b> |
|                                                                   |  | <b>94215</b>  | <b>Ugt2a1</b>   | <b>0.97448</b>  |
|                                                                   |  | <b>394430</b> | <b>Ugt1a10</b>  | <b>1.254373</b> |
|                                                                   |  | <b>72535</b>  | <b>Aldh1b1</b>  | <b>1.830414</b> |
|                                                                   |  | <b>100559</b> | <b>Ugt2b38</b>  | <b>2.824694</b> |
|                                                                   |  | <b>100727</b> | <b>Ugt2b34</b>  | <b>3.486643</b> |
| Linoleic acid metabolism                                          |  | 26970         | Pla2g2e         | -1.55384        |
|                                                                   |  | 66350         | Pla2g12a        | -0.81203        |
|                                                                   |  | <b>230459</b> | <b>Cyp2j13</b>  | <b>0.92393</b>  |
|                                                                   |  | <b>13110</b>  | <b>Cyp2j6</b>   | <b>0.955546</b> |
|                                                                   |  | <b>26565</b>  | <b>Pla2g10</b>  | <b>1.218373</b> |
|                                                                   |  | <b>69836</b>  | <b>Pla2g12b</b> | <b>1.34028</b>  |
|                                                                   |  | <b>18781</b>  | <b>Pla2g2c</b>  | <b>1.949176</b> |
|                                                                   |  | <b>13112</b>  | <b>Cyp3a11</b>  | <b>2.066924</b> |
|                                                                   |  | <b>13113</b>  | <b>Cyp3a13</b>  | <b>2.238127</b> |
|                                                                   |  | <b>13099</b>  | <b>Cyp2c40</b>  | <b>2.536402</b> |
|                                                                   |  | <b>107141</b> | <b>Cyp2c50</b>  | <b>2.555901</b> |

|  |                             |               |                 |                 |
|--|-----------------------------|---------------|-----------------|-----------------|
|  |                             | <b>13095</b>  | <b>Cyp2c29</b>  | <b>3.072696</b> |
|  |                             | <b>69888</b>  | <b>Cyp2c66</b>  | <b>3.206495</b> |
|  |                             | <b>433247</b> | <b>Cyp2c68</b>  | <b>3.274499</b> |
|  |                             | <b>72303</b>  | <b>Cyp2c65</b>  | <b>4.136602</b> |
|  |                             | <b>72082</b>  | <b>Cyp2c55</b>  | <b>4.559563</b> |
|  | Arachidonic acid metabolism | 13088         | Cyp2b10         | -3.70625        |
|  |                             | 320997        | Cyp4f39         | -2.49348        |
|  |                             | 11686         | Alox12b         | -2.12341        |
|  |                             | 64292         | Ptges           | -1.95058        |
|  |                             | 319446        | Dpep2           | -1.78526        |
|  |                             | 11690         | Alox5ap         | -1.69206        |
|  |                             | 19225         | Ptgs2           | -1.60905        |
|  |                             | 26970         | Pla2g2e         | -1.55384        |
|  |                             | 109857        | Cbr3            | -1.27599        |
|  |                             | 19223         | Ptgis           | -1.18808        |
|  |                             | 14778         | Gpx3            | -1.14709        |
|  |                             | 11689         | Alox5           | -1.04672        |
|  |                             | 67305         | Gpx7            | -1.03756        |
|  |                             | 69590         | Gpx8            | -0.91385        |
|  |                             | 66469         | Fam213b         | -0.86354        |
|  |                             | 66350         | Pla2g12a        | -0.81203        |
|  |                             | 19215         | Ptgds           | -0.6629         |
|  |                             | 67103         | Ptgr1           | -0.6351         |
|  |                             | <b>208285</b> | <b>Cyp4f17</b>  | <b>0.707887</b> |
|  |                             | <b>170716</b> | <b>Cyp4f13</b>  | <b>0.83413</b>  |
|  |                             | <b>230459</b> | <b>Cyp2j13</b>  | <b>0.92393</b>  |
|  |                             | <b>13110</b>  | <b>Cyp2j6</b>   | <b>0.955546</b> |
|  |                             | <b>26565</b>  | <b>Pla2g10</b>  | <b>1.218373</b> |
|  |                             | <b>69836</b>  | <b>Pla2g12b</b> | <b>1.34028</b>  |
|  |                             | <b>15446</b>  | <b>Hpgd</b>     | <b>1.637187</b> |
|  |                             | <b>27384</b>  | <b>Akr1c13</b>  | <b>1.733167</b> |
|  |                             | <b>622402</b> | <b>Akr1c12</b>  | <b>1.847407</b> |
|  |                             | <b>631304</b> | <b>Cyp4f40</b>  | <b>1.947573</b> |
|  |                             | <b>18781</b>  | <b>Pla2g2c</b>  | <b>1.949176</b> |
|  |                             | <b>545288</b> | <b>Cyp2c67</b>  | <b>2.508173</b> |
|  |                             | <b>13099</b>  | <b>Cyp2c40</b>  | <b>2.536402</b> |
|  |                             | <b>107141</b> | <b>Cyp2c50</b>  | <b>2.555901</b> |
|  |                             | <b>105387</b> | <b>Akr1c14</b>  | <b>2.737795</b> |
|  |                             | <b>432720</b> | <b>Akr1c19</b>  | <b>2.895549</b> |
|  |                             | <b>13095</b>  | <b>Cyp2c29</b>  | <b>3.072696</b> |
|  |                             | <b>69888</b>  | <b>Cyp2c66</b>  | <b>3.206495</b> |

|  |                                                        |                                                                                                                             |                |                  |
|--|--------------------------------------------------------|-----------------------------------------------------------------------------------------------------------------------------|----------------|------------------|
|  |                                                        | <b>433247</b>                                                                                                               | <b>Cyp2c68</b> | <b>3.274499</b>  |
|  |                                                        | <b>1E+08</b>                                                                                                                | <b>Cyp2c69</b> | <b>3.276957</b>  |
|  |                                                        | <b>64385</b>                                                                                                                | <b>Cyp4f14</b> | <b>3.873506</b>  |
|  |                                                        | <b>72303</b>                                                                                                                | <b>Cyp2c65</b> | <b>4.136602</b>  |
|  |                                                        | <b>72082</b>                                                                                                                | <b>Cyp2c55</b> | <b>4.559563</b>  |
|  | Synthesis of Prostaglandins (PG) and Thromboxanes (TX) | 64292                                                                                                                       | Ptges          | -1.95058         |
|  |                                                        | 19225                                                                                                                       | Ptgs2          | -1.60905         |
|  |                                                        | 19223                                                                                                                       | Ptgis          | -1.18808         |
|  |                                                        | 66469                                                                                                                       | Fam213b        | -0.86354         |
|  |                                                        | 19215                                                                                                                       | Ptgds          | -0.6629          |
|  |                                                        | <b>15446</b>                                                                                                                | <b>Hpgd</b>    | <b>1.637187</b>  |
|  |                                                        | <b>27384</b>                                                                                                                | <b>Akr1c13</b> | <b>1.733167</b>  |
|  |                                                        | <b>622402</b>                                                                                                               | <b>Akr1c12</b> | <b>1.847407</b>  |
|  |                                                        | <b>105387</b>                                                                                                               | <b>Akr1c14</b> | <b>2.737795</b>  |
|  |                                                        | <b>432720</b>                                                                                                               | <b>Akr1c19</b> | <b>2.895549</b>  |
|  |                                                        | Regulation of Insulin-like Growth Factor (IGF) Transport and Uptake by Insulin-like Growth Factor Binding Proteins (IGFBPs) | 18491          | Pappa            |
|  | 16008                                                  |                                                                                                                             | Igfbp2         | -1.45576         |
|  | 16010                                                  |                                                                                                                             | Igfbp4         | -1.17088         |
|  | 16012                                                  |                                                                                                                             | Igfbp6         | -0.97725         |
|  | 17390                                                  |                                                                                                                             | Mmp2           | -0.90074         |
|  | <b>16616</b>                                           |                                                                                                                             | <b>Klk1b21</b> | <b>1.750316</b>  |
|  | <b>16622</b>                                           |                                                                                                                             | <b>Klk1b5</b>  | <b>2.161531</b>  |
|  | <b>16617</b>                                           |                                                                                                                             | <b>Klk1b24</b> | <b>2.162845</b>  |
|  | <b>18048</b>                                           |                                                                                                                             | <b>Klk1b4</b>  | <b>2.265681</b>  |
|  | <b>16624</b>                                           |                                                                                                                             | <b>Klk1b8</b>  | <b>2.270613</b>  |
|  | <b>16618</b>                                           |                                                                                                                             | <b>Klk1b26</b> | <b>2.295813</b>  |
|  | <b>18050</b>                                           |                                                                                                                             | <b>Klk1b3</b>  | <b>2.316179</b>  |
|  | <b>16612</b>                                           |                                                                                                                             | <b>Klk1</b>    | <b>2.390543</b>  |
|  | <b>13646</b>                                           |                                                                                                                             | <b>Klk1b22</b> | <b>2.562583</b>  |
|  | Propanoate metabolism                                  | 16832                                                                                                                       | Ldhb           | -1.049013        |
|  |                                                        | <b>106557</b>                                                                                                               | <b>Ldhal6b</b> | <b>0.7084865</b> |
|  |                                                        | <b>17850</b>                                                                                                                | <b>Mut</b>     | <b>0.7362996</b> |
|  |                                                        | <b>11671</b>                                                                                                                | <b>Aldh3a2</b> | <b>0.779767</b>  |
|  |                                                        | <b>11669</b>                                                                                                                | <b>Aldh2</b>   | <b>0.8181583</b> |
|  |                                                        | <b>66904</b>                                                                                                                | <b>Pccb</b>    | <b>0.8738388</b> |
|  |                                                        | <b>60525</b>                                                                                                                | <b>Acss2</b>   | <b>1.0466773</b> |
|  |                                                        | <b>74147</b>                                                                                                                | <b>Ehhadh</b>  | <b>1.0968974</b> |
|  |                                                        | <b>68738</b>                                                                                                                | <b>Acss1</b>   | <b>1.1033255</b> |
|  |                                                        | <b>268860</b>                                                                                                               | <b>Abat</b>    | <b>1.1681836</b> |
|  |                                                        | <b>20917</b>                                                                                                                | <b>Suclg2</b>  | <b>1.4169702</b> |
|  |                                                        | <b>72535</b>                                                                                                                | <b>Aldh1b1</b> | <b>1.8304137</b> |

|                        |                                            |               |                                  |                  |         |          |
|------------------------|--------------------------------------------|---------------|----------------------------------|------------------|---------|----------|
|                        | UDP-N-acetyl-D-glucosamine biosynthesis II | 14584         | Gfpt2                            | -1.786155        |         |          |
|                        |                                            | <b>66681</b>  | <b>Pgm1</b>                      | <b>0.6577726</b> |         |          |
|                        |                                            | <b>109785</b> | <b>Pgm3</b>                      | <b>0.7860824</b> |         |          |
|                        |                                            | <b>54342</b>  | <b>Gnpnat1</b>                   | <b>0.7916704</b> |         |          |
|                        |                                            | <b>14583</b>  | <b>Gfpt1</b>                     | <b>1.4531144</b> |         |          |
| Metabolism of proteins | O-linked glycosylation of mucins           | 108148        | Galnt2                           | -1.04769         |         |          |
|                        |                                            | 78754         | Galnt15                          | -0.99068         |         |          |
|                        |                                            | 232984        | B3gnt8                           | -0.59967         |         |          |
|                        |                                            | <b>59048</b>  | <b>C1galt1c1</b>                 | <b>0.679343</b>  |         |          |
|                        |                                            | <b>14426</b>  | <b>Galnt4</b>                    | <b>0.916186</b>  |         |          |
|                        |                                            | <b>94192</b>  | <b>C1galt1</b>                   | <b>0.953988</b>  |         |          |
|                        |                                            | <b>171212</b> | <b>Galnt10</b>                   | <b>0.969919</b>  |         |          |
|                        |                                            | <b>140474</b> | <b>Muc4</b>                      | <b>1.024719</b>  |         |          |
|                        |                                            | <b>20441</b>  | <b>St3gal3</b>                   | <b>1.033166</b>  |         |          |
|                        |                                            | <b>72297</b>  | <b>B3gnt3</b>                    | <b>1.106007</b>  |         |          |
|                        |                                            | <b>230145</b> | <b>Galnt12</b>                   | <b>1.201133</b>  |         |          |
|                        |                                            | <b>108150</b> | <b>Galnt7</b>                    | <b>1.37418</b>   |         |          |
|                        |                                            | <b>207839</b> | <b>Galnt6</b>                    | <b>1.483364</b>  |         |          |
|                        |                                            | <b>17063</b>  | <b>Muc13</b>                     | <b>1.729689</b>  |         |          |
|                        |                                            | <b>72077</b>  | <b>Gcnt3</b>                     | <b>2.629908</b>  |         |          |
|                        |                                            | <b>241391</b> | <b>Galnt5</b>                    | <b>2.719413</b>  |         |          |
|                        |                                            |               | Mucin type O-Glycan biosynthesis | 108760           | Galnt16 | -1.84967 |
|                        |                                            |               |                                  | 108148           | Galnt2  | -1.04769 |
|                        |                                            |               |                                  | 78754            | Galnt15 | -0.99068 |
|                        |                                            |               |                                  | 233733           | Galnt18 | -0.90069 |
|                        |                                            | <b>59048</b>  | <b>C1galt1c1</b>                 | <b>0.679343</b>  |         |          |
|                        |                                            | <b>14426</b>  | <b>Galnt4</b>                    | <b>0.916186</b>  |         |          |
|                        |                                            | <b>94192</b>  | <b>C1galt1</b>                   | <b>0.953988</b>  |         |          |
|                        |                                            | <b>171212</b> | <b>Galnt10</b>                   | <b>0.969919</b>  |         |          |
|                        |                                            | <b>230145</b> | <b>Galnt12</b>                   | <b>1.201133</b>  |         |          |
|                        |                                            | <b>270049</b> | <b>Galntl6</b>                   | <b>1.266109</b>  |         |          |
|                        |                                            | <b>108150</b> | <b>Galnt7</b>                    | <b>1.37418</b>   |         |          |
|                        |                                            | <b>207839</b> | <b>Galnt6</b>                    | <b>1.483364</b>  |         |          |
|                        |                                            | <b>72077</b>  | <b>Gcnt3</b>                     | <b>2.629908</b>  |         |          |
|                        |                                            | <b>241391</b> | <b>Galnt5</b>                    | <b>2.719413</b>  |         |          |
| Immune response        | Cytokine-cytokine receptor interaction     | 20311         | Cxcl5                            | -4.34495         |         |          |
|                        |                                            | 14825         | Cxcl1                            | -3.66321         |         |          |
|                        |                                            | 16156         | Il11                             | -3.30123         |         |          |
|                        |                                            | 12765         | Cxcr2                            | -3.17533         |         |          |
|                        |                                            | 16324         | Inhbb                            | -2.62677         |         |          |
|                        |                                            | 18413         | Osm                              | -2.42429         |         |          |

|  |  |        |           |          |
|--|--|--------|-----------|----------|
|  |  | 16176  | Il1b      | -2.39883 |
|  |  | 16323  | Inhba     | -2.3647  |
|  |  | 20296  | Ccl2      | -2.33834 |
|  |  | 20306  | Ccl7      | -2.30947 |
|  |  | 16171  | Il17a     | -2.10969 |
|  |  | 14205  | Figf      | -1.92988 |
|  |  | 329244 | Il19      | -1.89374 |
|  |  | 16178  | Il1r2     | -1.81448 |
|  |  | 20303  | Ccl4      | -1.80734 |
|  |  | 237313 | Il20ra    | -1.72651 |
|  |  | 12778  | Ackr3     | -1.56997 |
|  |  | 27279  | Tnfrsf12a | -1.4118  |
|  |  | 213208 | Il20rb    | -1.40338 |
|  |  | 12984  | Csf2rb2   | -1.375   |
|  |  | 12804  | Cntfr     | -1.34321 |
|  |  | 14254  | Flt1      | -1.28931 |
|  |  | 18414  | Osmr      | -1.27205 |
|  |  | 12981  | Csf2      | -1.26039 |
|  |  | 16174  | Il18rap   | -1.23762 |
|  |  | 21950  | Tnfsf9    | -1.21694 |
|  |  | 56221  | Ccl24     | -1.19359 |
|  |  | 12772  | Ccr2      | -1.18817 |
|  |  | 12162  | Bmp7      | -1.15597 |
|  |  | 21809  | Tgfb3     | -1.13117 |
|  |  | 50930  | Tnfsf14   | -1.13101 |
|  |  | 20292  | Ccl11     | -1.08681 |
|  |  | 16177  | Il1r1     | -1.07659 |
|  |  | 12774  | Ccr5      | -1.06964 |
|  |  | 12167  | Bmpr1b    | -1.05427 |
|  |  | 56744  | Pf4       | -1.01392 |
|  |  | 21936  | Tnfrsf18  | -0.98226 |
|  |  | 12776  | Ccr8      | -0.96612 |
|  |  | 245527 | Eda2r     | -0.95375 |
|  |  | 13607  | Eda       | -0.94984 |
|  |  | 20308  | Ccl9      | -0.9276  |
|  |  | 18596  | Pdgfrb    | -0.9223  |
|  |  | 57266  | Cxcl14    | -0.81335 |
|  |  | 15976  | Ifnar2    | -0.79849 |
|  |  | 16195  | Il6st     | -0.78633 |
|  |  | 16188  | Il3ra     | -0.77416 |
|  |  | 16157  | Il11ra1   | -0.73559 |



|  |                                     |               |                  |                  |
|--|-------------------------------------|---------------|------------------|------------------|
|  |                                     | 21944         | Tnfsf12          | -0.73266         |
|  |                                     | 16190         | Il4ra            | -0.63756         |
|  |                                     | 11477         | Acvr1            | -0.63677         |
|  |                                     | 15968         | Ifna5            | -0.61563         |
|  |                                     | 1E+08         | Gm20878          | -0.60711         |
|  |                                     | 21937         | Tnfrsf1a         | -0.60442         |
|  |                                     | 12977         | Csf1             | -0.60055         |
|  |                                     | <b>12986</b>  | <b>Csf3r</b>     | <b>0.59828</b>   |
|  |                                     | <b>326623</b> | <b>Tnfsf15</b>   | <b>0.694025</b>  |
|  |                                     | <b>21934</b>  | <b>Tnfrsf11a</b> | <b>0.695412</b>  |
|  |                                     | <b>16590</b>  | <b>Kit</b>       | <b>0.766462</b>  |
|  |                                     | <b>12168</b>  | <b>Bmpr2</b>     | <b>0.800831</b>  |
|  |                                     | <b>13051</b>  | <b>Cx3cr1</b>    | <b>1.128915</b>  |
|  |                                     | <b>230828</b> | <b>Il22ra1</b>   | <b>1.173466</b>  |
|  |                                     | <b>16168</b>  | <b>Il15</b>      | <b>1.309923</b>  |
|  |                                     | <b>16173</b>  | <b>Il18</b>      | <b>1.377159</b>  |
|  |                                     | <b>16963</b>  | <b>Xcl1</b>      | <b>1.565947</b>  |
|  |                                     | <b>56838</b>  | <b>Ccl28</b>     | <b>1.79597</b>   |
|  |                                     | <b>387510</b> | <b>Ifnk</b>      | <b>1.903833</b>  |
|  |                                     | <b>23832</b>  | <b>Xcr1</b>      | <b>2.111892</b>  |
|  | Complement and coagulation cascades | 18787         | Serpine1         | -2.602674        |
|  |                                     | 14058         | F10              | -1.842658        |
|  |                                     | 12273         | C5ar1            | -1.780122        |
|  |                                     | 18791         | Plat             | -1.499046        |
|  |                                     | 18793         | Plaur            | -1.447755        |
|  |                                     | 17174         | Masp1            | -1.230056        |
|  |                                     | 19128         | Pros1            | -1.020553        |
|  |                                     | 12628         | Cfh              | -1.014873        |
|  |                                     | 12268         | C4b              | -0.937435        |
|  |                                     | 18792         | Plau             | -0.884646        |
|  |                                     | 50908         | C1s1             | -0.867112        |
|  |                                     | 12258         | Serping1         | -0.856848        |
|  |                                     | 14067         | F5               | -0.836852        |
|  |                                     | 12260         | C1qb             | -0.717686        |
|  |                                     | 12267         | C3ar1            | -0.682265        |
|  |                                     | 12259         | C1qa             | -0.666613        |
|  |                                     | 12061         | Bdkrb1           | -0.603269        |
|  |                                     | 21824         | Thbd             | -0.593737        |
|  |                                     | <b>56373</b>  | <b>Cpb2</b>      | <b>1.0812315</b> |
|  |                                     | <b>19123</b>  | <b>Proc</b>      | <b>1.383527</b>  |
|  |                                     | <b>12269</b>  | <b>C4bp</b>      | <b>1.5648379</b> |

|                   |                                 |                 |                |                 |
|-------------------|---------------------------------|-----------------|----------------|-----------------|
|                   | Staphylococcus aureus infection | 14293           | Fpr1           | -3.03344        |
|                   |                                 | 14289           | Fpr2           | -2.50436        |
|                   |                                 | 20344           | Selp           | -2.04701        |
|                   |                                 | 12273           | C5ar1          | -1.78012        |
|                   |                                 | 246256          | Fcgr4          | -1.63746        |
|                   |                                 | 14131           | Fcgr3          | -1.25112        |
|                   |                                 | 17174           | Masp1          | -1.23006        |
|                   |                                 | 14130           | Fcgr2b         | -1.22614        |
|                   |                                 | 14129           | Fcgr1          | -1.09932        |
|                   |                                 | 12628           | Cfh            | -1.01487        |
|                   |                                 | 12268           | C4b            | -0.93744        |
|                   |                                 | 317677          | C1s2           | -0.9368         |
|                   |                                 | 50908           | C1s1           | -0.86711        |
|                   |                                 | 19204           | Ptafr          | -0.72302        |
|                   |                                 | 12260           | C1qb           | -0.71769        |
|                   |                                 | 12267           | C3ar1          | -0.68227        |
|                   |                                 | 12259           | C1qa           | -0.66661        |
| Cancer signalling | Chemical carcinogenesis         | 13088           | Cyp2b10        | -3.70625        |
|                   |                                 | 19225           | Ptgs2          | -1.60905        |
|                   |                                 | 15483           | Hsd11b1        | -0.9844         |
|                   |                                 | <b>103140</b>   | <b>Gstt3</b>   | <b>0.777197</b> |
|                   |                                 | <b>14872</b>    | <b>Gstt2</b>   | <b>0.813855</b> |
|                   |                                 | <b>17961</b>    | <b>Nat2</b>    | <b>0.824478</b> |
|                   |                                 | <b>94284</b>    | <b>Ugt1a6a</b> | <b>0.900385</b> |
|                   |                                 | <b>66447</b>    | <b>Mgst3</b>   | <b>0.971084</b> |
|                   |                                 | <b>94215</b>    | <b>Ugt2a1</b>  | <b>0.97448</b>  |
|                   |                                 | <b>76263</b>    | <b>Gstk1</b>   | <b>1.087932</b> |
|                   |                                 | <b>394430</b>   | <b>Ugt1a10</b> | <b>1.254373</b> |
|                   |                                 | <b>211666</b>   | <b>Mgst2</b>   | <b>1.363034</b> |
|                   |                                 | <b>20887</b>    | <b>Sult1a1</b> | <b>1.5804</b>   |
|                   |                                 | <b>13112</b>    | <b>Cyp3a11</b> | <b>2.066924</b> |
|                   |                                 | <b>13113</b>    | <b>Cyp3a13</b> | <b>2.238127</b> |
|                   |                                 | <b>13099</b>    | <b>Cyp2c40</b> | <b>2.536402</b> |
|                   |                                 | <b>107141</b>   | <b>Cyp2c50</b> | <b>2.555901</b> |
|                   |                                 | <b>17962</b>    | <b>Nat3</b>    | <b>2.585722</b> |
|                   |                                 | <b>100559</b>   | <b>Ugt2b38</b> | <b>2.824694</b> |
|                   |                                 | <b>13095</b>    | <b>Cyp2c29</b> | <b>3.072696</b> |
|                   |                                 | <b>69888</b>    | <b>Cyp2c66</b> | <b>3.206495</b> |
|                   |                                 | <b>433247</b>   | <b>Cyp2c68</b> | <b>3.274499</b> |
|                   |                                 | <b>100727</b>   | <b>Ugt2b34</b> | <b>3.486643</b> |
| <b>72303</b>      | <b>Cyp2c65</b>                  | <b>4.136602</b> |                |                 |

|             |                                                                                                                                                      |                                                |                |                 |                 |
|-------------|------------------------------------------------------------------------------------------------------------------------------------------------------|------------------------------------------------|----------------|-----------------|-----------------|
|             |                                                                                                                                                      | <b>72082</b>                                   | <b>Cyp2c55</b> | <b>4.559563</b> |                 |
|             | FGFR3c ligand binding and activation Signaling by FGFR3 mutants<br>FGFR3 ligand binding and activation Signaling by activated point mutants of FGFR3 | 14172                                          | Fgf18          | -1.82915        |                 |
|             |                                                                                                                                                      | 14173                                          | Fgf2           | -1.4179         |                 |
|             |                                                                                                                                                      | <b>14180</b>                                   | <b>Fgf9</b>    | <b>1.024348</b> |                 |
|             |                                                                                                                                                      | <b>64654</b>                                   | <b>Fgf23</b>   | <b>1.226145</b> |                 |
|             |                                                                                                                                                      | <b>14179</b>                                   | <b>Fgf8</b>    | <b>1.751112</b> |                 |
|             | FGFR1c ligand binding and activation Signaling by activated point mutants of FGFR1                                                                   | 14173                                          | Fgf2           | -1.4179         |                 |
|             |                                                                                                                                                      | 14182                                          | Fgfr1          | -0.69788        |                 |
|             |                                                                                                                                                      | <b>14180</b>                                   | <b>Fgf9</b>    | <b>1.024348</b> |                 |
|             |                                                                                                                                                      | <b>64654</b>                                   | <b>Fgf23</b>   | <b>1.226145</b> |                 |
|             |                                                                                                                                                      | <b>14179</b>                                   | <b>Fgf8</b>    | <b>1.751112</b> |                 |
| Haemostasis | Common Pathway of Fibrin Clot Formation                                                                                                              | 14058                                          | F10            | -1.84266        |                 |
|             |                                                                                                                                                      | 74145                                          | F13a1          | -1.41525        |                 |
|             |                                                                                                                                                      | 19128                                          | Pros1          | -1.02055        |                 |
|             |                                                                                                                                                      | 56744                                          | Pf4            | -1.01392        |                 |
|             |                                                                                                                                                      | 14067                                          | F5             | -0.83685        |                 |
|             |                                                                                                                                                      | 21824                                          | Thbd           | -0.59374        |                 |
|             |                                                                                                                                                      | <b>19123</b>                                   | <b>Proc</b>    | <b>1.383527</b> |                 |
|             |                                                                                                                                                      | Cell surface interactions at the vascular wall | 20344          | Selp            | -2.04701        |
|             |                                                                                                                                                      |                                                | 11602          | Angpt4          | -1.97774        |
|             |                                                                                                                                                      |                                                | 80879          | Slc16a3         | -1.57048        |
|             |                                                                                                                                                      |                                                | 14268          | Fn1             | -1.48474        |
|             |                                                                                                                                                      |                                                | 16402          | Itga5           | -1.3317         |
|             |                                                                                                                                                      |                                                | 67374          | Jam2            | -1.05142        |
|             |                                                                                                                                                      |                                                | 14127          | Fcer1g          | -1.02748        |
|             |                                                                                                                                                      |                                                | 19128          | Pros1           | -1.02055        |
|             |                                                                                                                                                      |                                                | 56744          | Pf4             | -1.01392        |
|             |                                                                                                                                                      |                                                | 69524          | Esam            | -0.9507         |
|             |                                                                                                                                                      |                                                | 330836         | Slc7a6          | -0.78741        |
|             |                                                                                                                                                      |                                                | 13449          | Dok2            | -0.7873         |
|             |                                                                                                                                                      |                                                | 11933          | Atp1b3          | -0.76755        |
|             |                                                                                                                                                      |                                                | 16412          | Itgb1           | -0.67394        |
|             |                                                                                                                                                      |                                                | 83964          | Jam3            | -0.61841        |
|             |                                                                                                                                                      |                                                | 11421          | Ace             | -0.642567       |
|             |                                                                                                                                                      |                                                | 270152         | Amica1          | -0.61308        |
|             |                                                                                                                                                      |                                                | 21824          | Thbd            | -0.59374        |
|             |                                                                                                                                                      |                                                | <b>16653</b>   | <b>Kras</b>     | <b>0.827463</b> |
|             |                                                                                                                                                      |                                                | <b>16728</b>   | <b>L1cam</b>    | <b>0.83648</b>  |
|             |                                                                                                                                                      |                                                | <b>14786</b>   | <b>Grb7</b>     | <b>1.147856</b> |
|             |                                                                                                                                                      |                                                | <b>11931</b>   | <b>Atp1b1</b>   | <b>1.177377</b> |
|             |                                                                                                                                                      |                                                | <b>13052</b>   | <b>Cxadr</b>    | <b>1.211875</b> |

|                                   |                                   |              |               |                 |
|-----------------------------------|-----------------------------------|--------------|---------------|-----------------|
|                                   |                                   | <b>19123</b> | <b>Proc</b>   | <b>1.383527</b> |
|                                   |                                   | <b>30962</b> | <b>Slc7a9</b> | <b>1.507333</b> |
|                                   |                                   | <b>18706</b> | <b>Pik3ca</b> | <b>1.94193</b>  |
| Extracellular matrix organisation | Extracellular matrix organization | 103964       | Try5          | -6.95841        |
|                                   |                                   | 22074        | Try4          | -6.80598        |
|                                   |                                   | 22072        | Prss2         | -6.4655         |
|                                   |                                   | 1E+08        | Gm10334       | -5.43591        |
|                                   |                                   | 17384        | Mmp10         | -3.57344        |
|                                   |                                   | 22073        | Prss3         | -3.56028        |
|                                   |                                   | 17394        | Mmp8          | -3.34127        |
|                                   |                                   | 17386        | Mmp13         | -3.04753        |
|                                   |                                   | 18787        | Serpine1      | -2.60267        |
|                                   |                                   | 16948        | Lox           | -2.53793        |
|                                   |                                   | 21857        | Timp1         | -2.07328        |
|                                   |                                   | 17395        | <i>Mmp9</i>   | -1.95523        |
|                                   |                                   | 50530        | Mfap5         | -1.55405        |
|                                   |                                   | 14268        | Fn1           | -1.48474        |
|                                   |                                   | 23794        | Adamts5       | -1.48121        |
|                                   |                                   | 13038        | Ctsk          | -1.42001        |
|                                   |                                   | 14173        | <i>Fgf2</i>   | -1.4179         |
|                                   |                                   | 12837        | Col8a1        | -1.36969        |
|                                   |                                   | 16776        | Lama5         | -1.33705        |
|                                   |                                   | 16402        | Itga5         | -1.3317         |
|                                   |                                   | 16949        | Loxl1         | -1.26522        |
|                                   |                                   | 12842        | Col1a1        | -1.2469         |
|                                   |                                   | 18074        | Nid2          | -1.24567        |
|                                   |                                   | 14115        | Fbln2         | -1.2306         |
|                                   |                                   | 12831        | Col5a1        | -1.22051        |
|                                   |                                   | 17228        | Cma1          | -1.19147        |
|                                   |                                   | 237360       | Adamts14      | -1.19042        |
|                                   |                                   | 21825        | Thbs1         | -1.16147        |
|                                   |                                   | 12162        | Bmp7          | -1.15597        |
|                                   |                                   | 58223        | Mmp19         | -1.14639        |
|                                   |                                   | 12827        | Col4a2        | -1.12303        |
|                                   |                                   | 14118        | Fbn1          | -1.10411        |
|                                   |                                   | 20692        | Sparc         | -1.07947        |
|                                   |                                   | 67374        | Jam2          | -1.05142        |
|                                   |                                   | 58859        | Efemp2        | -1.04386        |
|                                   |                                   | 12826        | Col4a1        | -1.04373        |
| 12822                             | Col18a1                           | -0.99187     |               |                 |
| 18214                             | Ddr2                              | -0.98714     |               |                 |

|  |                                         |               |               |                 |
|--|-----------------------------------------|---------------|---------------|-----------------|
|  |                                         | 17381         | Mmp12         | -0.97331        |
|  |                                         | 16416         | Itgb3         | -0.9521         |
|  |                                         | 56693         | Crtap         | -0.93321        |
|  |                                         | 17229         | Tpsb2         | -0.90222        |
|  |                                         | 17390         | Mmp2          | -0.90074        |
|  |                                         | 12153         | Bmp1          | -0.88652        |
|  |                                         | 16399         | Itga2b        | -0.8846         |
|  |                                         | 17387         | Mmp14         | -0.88225        |
|  |                                         | 17183         | Matn4         | -0.876          |
|  |                                         | 14789         | P3h3          | -0.8704         |
|  |                                         | 12111         | Bgn           | -0.86889        |
|  |                                         | 18542         | Pcolce        | -0.85151        |
|  |                                         | 78369         | Icam4         | -0.84185        |
|  |                                         | 12154         | Bmp10         | -0.83219        |
|  |                                         | 23876         | Fbln5         | -0.81925        |
|  |                                         | 16998         | Ltbp3         | -0.79868        |
|  |                                         | 26432         | Plod2         | -0.75722        |
|  |                                         | 13039         | Ctsl          | -0.75546        |
|  |                                         | 226519        | Lamc1         | -0.75043        |
|  |                                         | 216725        | Adamts2       | -0.72634        |
|  |                                         | 12832         | Col5a2        | -0.70187        |
|  |                                         | 16412         | Itgb1         | -0.67394        |
|  |                                         | 21858         | Timp2         | -0.65079        |
|  |                                         | 13003         | Vcan          | -0.6463         |
|  |                                         | 76293         | Mfap4         | -0.64341        |
|  |                                         | 15530         | Hspg2         | -0.63594        |
|  |                                         | 83964         | Jam3          | -0.61841        |
|  |                                         | 12814         | Col11a1       | -0.59561        |
|  |                                         | 13179         | Dcn           | -0.58753        |
|  |                                         | <b>17388</b>  | <b>Mmp15</b>  | <b>0.646751</b> |
|  |                                         | <b>16780</b>  | <b>Lamb3</b>  | <b>0.779921</b> |
|  |                                         | <b>19164</b>  | <b>Psen1</b>  | <b>0.797152</b> |
|  |                                         | <b>18750</b>  | <b>Prkca</b>  | <b>0.853424</b> |
|  |                                         | <b>12550</b>  | <b>Cdh1</b>   | <b>0.894417</b> |
|  |                                         | <b>16420</b>  | <b>Itgb6</b>  | <b>0.946717</b> |
|  |                                         | <b>12367</b>  | <b>Casp3</b>  | <b>1.014783</b> |
|  |                                         | <b>213119</b> | <b>Itga10</b> | <b>1.186335</b> |
|  | Degradation of the extracellular matrix | 103964        | Try5          | -6.95841        |
|  |                                         | 22074         | Try4          | -6.80598        |
|  |                                         | 22072         | Prss2         | -6.4655         |
|  |                                         | 100040233     | Gm10334       | -5.43591        |

|  |                                         |              |              |                 |
|--|-----------------------------------------|--------------|--------------|-----------------|
|  |                                         | 17384        | Mmp10        | -3.57344        |
|  |                                         | 22073        | Prss3        | -3.56028        |
|  |                                         | 17394        | Mmp8         | -3.34127        |
|  |                                         | 17386        | Mmp13        | -3.04753        |
|  |                                         | 21857        | Timp1        | -2.07328        |
|  |                                         | 17395        | <i>Mmp9</i>  | -1.95523        |
|  |                                         | 23794        | Adamts5      | -1.48121        |
|  |                                         | 13038        | Ctsk         | -1.42001        |
|  |                                         | 16776        | Lama5        | -1.33705        |
|  |                                         | 17228        | Cma1         | -1.19147        |
|  |                                         | 58223        | Mmp19        | -1.14639        |
|  |                                         | 12822        | Col18a1      | -0.99187        |
|  |                                         | 17381        | Mmp12        | -0.97331        |
|  |                                         | 17229        | Tpsb2        | -0.90222        |
|  |                                         | 17390        | <i>Mmp2</i>  | -0.90074        |
|  |                                         | 12153        | Bmp1         | -0.88652        |
|  |                                         | 17387        | Mmp14        | -0.88225        |
|  |                                         | 13039        | Ctsl         | -0.75546        |
|  |                                         | 226519       | Lamc1        | -0.75043        |
|  |                                         | 21858        | Timp2        | -0.65079        |
|  |                                         | 15530        | Hspg2        | -0.63594        |
|  |                                         | 13179        | Dcn          | -0.58753        |
|  |                                         | <b>17388</b> | <b>Mmp15</b> | <b>0.646751</b> |
|  |                                         | <b>16780</b> | <b>Lamb3</b> | <b>0.779921</b> |
|  |                                         | <b>19164</b> | <b>Psen1</b> | <b>0.797152</b> |
|  |                                         | <b>12550</b> | <b>Cdh1</b>  | <b>0.894417</b> |
|  |                                         | <b>12367</b> | <b>Casp3</b> | <b>1.014783</b> |
|  | Activation of Matrix Metalloproteinases | 103964       | Try5         | -6.95841        |
|  |                                         | 22074        | Try4         | -6.80598        |
|  |                                         | 22072        | Prss2        | -6.4655         |
|  |                                         | 100040233    | Gm10334      | -5.43591        |
|  |                                         | 17384        | Mmp10        | -3.57344        |
|  |                                         | 22073        | Prss3        | -3.56028        |
|  |                                         | 17386        | Mmp13        | -3.04753        |
|  |                                         | 21857        | Timp1        | -2.07328        |
|  |                                         | 17395        | <i>Mmp9</i>  | -1.95523        |
|  |                                         | 13038        | Ctsk         | -1.42001        |
|  |                                         | 17228        | Cma1         | -1.19147        |
|  |                                         | 12822        | Col18a1      | -0.99187        |
|  |                                         | 17229        | Tpsb2        | -0.90222        |
|  |                                         | 17390        | <i>Mmp2</i>  | -0.90074        |

|  |                           |              |              |                 |
|--|---------------------------|--------------|--------------|-----------------|
|  |                           | 17387        | Mmp14        | -0.88225        |
|  |                           | 13039        | Ctsl         | -0.75546        |
|  |                           | 21858        | Timp2        | -0.65079        |
|  | Matrix Metalloproteinases | 17384        | Mmp10        | -3.57344        |
|  |                           | 17394        | Mmp8         | -3.34127        |
|  |                           | 17386        | Mmp13        | -3.04753        |
|  |                           | 21857        | Timp1        | -2.07328        |
|  |                           | 17395        | <i>Mmp9</i>  | -1.95523        |
|  |                           | 58223        | Mmp19        | -1.14639        |
|  |                           | 17381        | Mmp12        | -0.97331        |
|  |                           | 17390        | <i>Mmp2</i>  | -0.90074        |
|  |                           | 17387        | Mmp14        | -0.88225        |
|  |                           | 21859        | Timp3        | -0.70261        |
|  |                           | 26561        | Mmp23        | -0.67758        |
|  |                           | 21858        | Timp2        | -0.65079        |
|  |                           | <b>17388</b> | <b>Mmp15</b> | <b>0.646751</b> |
|  | Elastic fibre formation   | 50530        | Mfap5        | -1.55405        |
|  |                           | 16402        | Itga5        | -1.3317         |
|  |                           | 14115        | Fbln2        | -1.2306         |
|  |                           | 12162        | Bmp7         | -1.15597        |
|  |                           | 14118        | Fbn1         | -1.10411        |
|  |                           | 58859        | Efemp2       | -1.04386        |
|  |                           | 16416        | Itgb3        | -0.9521         |
|  |                           | 12154        | Bmp10        | -0.83219        |
|  |                           | 23876        | Fbln5        | -0.81925        |
|  |                           | 16998        | Ltbp3        | -0.79868        |
|  |                           | 16412        | Itgb1        | -0.67394        |
|  |                           | 76293        | Mfap4        | -0.64341        |
|  |                           | <b>16420</b> | <b>Itgb6</b> | <b>0.946717</b> |
|  | Collagen formation        | 17384        | Mmp10        | -3.57344        |
|  |                           | 17386        | Mmp13        | -3.04753        |
|  |                           | 16948        | Lox          | -2.53793        |
|  |                           | 17395        | <i>Mmp9</i>  | -1.95523        |
|  |                           | 12837        | Col8a1       | -1.36969        |
|  |                           | 16949        | Loxl1        | -1.26522        |
|  |                           | 12842        | Col1a1       | -1.2469         |
|  |                           | 12831        | Col5a1       | -1.22051        |
|  |                           | 237360       | Adamts14     | -1.19042        |
|  |                           | 12827        | Col4a2       | -1.12303        |
|  |                           | 12826        | Col4a1       | -1.04373        |
|  |                           | 12822        | Col18a1      | -0.99187        |

|                  |                                                              |                |                |                 |          |
|------------------|--------------------------------------------------------------|----------------|----------------|-----------------|----------|
|                  |                                                              | 56693          | Crtap          | -0.93321        |          |
|                  |                                                              | 12153          | Bmp1           | -0.88652        |          |
|                  |                                                              | 14789          | P3h3           | -0.8704         |          |
|                  |                                                              | 18542          | Pcolce         | -0.85151        |          |
|                  |                                                              | 26432          | Plod2          | -0.75722        |          |
|                  |                                                              | 13039          | Ctsl           | -0.75546        |          |
|                  |                                                              | 216725         | Adamts2        | -0.72634        |          |
|                  |                                                              | 12832          | Col5a2         | -0.70187        |          |
|                  |                                                              | 12814          | Col11a1        | -0.59561        |          |
|                  |                                                              | <b>16780</b>   | <b>Lamb3</b>   | <b>0.779921</b> |          |
|                  | Assembly of collagen fibrils and other multimeric structures | 17384          | Mmp10          | -3.57344        |          |
|                  |                                                              | 17386          | Mmp13          | -3.04753        |          |
|                  |                                                              | 16948          | Lox            | -2.53793        |          |
|                  |                                                              | 17395          | <i>Mmp9</i>    | -1.95523        |          |
|                  |                                                              | 12837          | Col8a1         | -1.36969        |          |
|                  |                                                              | 16949          | Loxl1          | -1.26522        |          |
|                  |                                                              | 12827          | Col4a2         | -1.12303        |          |
|                  |                                                              | 12826          | Col4a1         | -1.04373        |          |
|                  |                                                              | 12822          | Col18a1        | -0.99187        |          |
|                  |                                                              | 12153          | Bmp1           | -0.88652        |          |
|                  |                                                              | 13039          | Ctsl           | -0.75546        |          |
|                  |                                                              | <b>16780</b>   | <b>Lamb3</b>   | <b>0.779921</b> |          |
| Digestive system |                                                              | Bile secretion | 104110         | Adcy4           | -1.16978 |
|                  |                                                              |                | 27222          | Atp1a4          | -1.09805 |
|                  |                                                              |                | 239273         | Abcc4           | -1.08389 |
|                  | 210044                                                       |                | Adcy2          | -0.99756        |          |
|                  | 64008                                                        |                | Aqp9           | -0.95331        |          |
|                  | 11933                                                        |                | Atp1b3         | -0.76755        |          |
|                  | <b>320024</b>                                                |                | <b>Nceh1</b>   | <b>0.717925</b> |          |
|                  | <b>20537</b>                                                 |                | <b>Slc5a1</b>  | <b>0.762464</b> |          |
|                  | <b>11928</b>                                                 |                | <b>Atp1a1</b>  | <b>0.814248</b> |          |
|                  | <b>26357</b>                                                 |                | <b>Abcg2</b>   | <b>0.910726</b> |          |
|                  | <b>18669</b>                                                 |                | <b>Abcb1b</b>  | <b>0.947346</b> |          |
|                  | <b>11512</b>                                                 |                | <b>Adcy6</b>   | <b>0.967657</b> |          |
|                  | <b>11931</b>                                                 |                | <b>Atp1b1</b>  | <b>1.177377</b> |          |
|                  | <b>76408</b>                                                 |                | <b>Abcc3</b>   | <b>1.189916</b> |          |
|                  | <b>12349</b>                                                 |                | <b>Car2</b>    | <b>1.218899</b> |          |
|                  | <b>18670</b>                                                 |                | <b>Abcb4</b>   | <b>1.326175</b> |          |
|                  | <b>18671</b>                                                 |                | <b>Abcb1a</b>  | <b>1.373398</b> |          |
|                  | <b>20186</b>                                                 |                | <b>Nr1h4</b>   | <b>1.42261</b>  |          |
|                  | <b>20517</b>                                                 |                | <b>Slc22a1</b> | <b>1.679911</b> |          |



|  |                                             |               |                 |                  |
|--|---------------------------------------------|---------------|-----------------|------------------|
|  |                                             | <b>12638</b>  | <b>Cftr</b>     | <b>1.952521</b>  |
|  |                                             | <b>28254</b>  | <b>Slco1a6</b>  | <b>1.98067</b>   |
|  |                                             | <b>330962</b> | <b>Slc51b</b>   | <b>2.335887</b>  |
|  |                                             | <b>20494</b>  | <b>Slc10a2</b>  | <b>2.71532</b>   |
|  |                                             | <b>105243</b> | <b>Slc9a3</b>   | <b>2.762093</b>  |
|  |                                             | <b>11833</b>  | <b>Aqp8</b>     | <b>3.844864</b>  |
|  |                                             | <b>106407</b> | <b>Slc51a</b>   | <b>4.704848</b>  |
|  | Pancreatic secretion                        | 103964        | Try5            | -6.958405        |
|  |                                             | 22074         | Try4            | -6.805979        |
|  |                                             | 109697        | Cpa1            | -6.506434        |
|  |                                             | 22072         | Prss2           | -6.465498        |
|  |                                             | 1E+08         | Gm10334         | -5.435911        |
|  |                                             | 18946         | Pnliprp1        | -5.269375        |
|  |                                             | 12613         | Cel             | -4.981617        |
|  |                                             | 11937         | Atp2a1          | -1.741202        |
|  |                                             | 26970         | Pla2g2e         | -1.553839        |
|  |                                             | 12182         | Bst1            | -1.527494        |
|  |                                             | 104110        | Adcy4           | -1.169776        |
|  |                                             | 27222         | Atp1a4          | -1.098046        |
|  |                                             | 210044        | Adcy2           | -0.997562        |
|  |                                             | 66350         | Pla2g12a        | -0.812027        |
|  |                                             | 11933         | Atp1b3          | -0.76755         |
|  |                                             | <b>16440</b>  | <b>Itpr3</b>    | <b>0.6272043</b> |
|  |                                             | <b>67972</b>  | <b>Atp2b1</b>   | <b>0.6699104</b> |
|  |                                             | <b>80718</b>  | <b>Rab27b</b>   | <b>0.6804285</b> |
|  |                                             | <b>11928</b>  | <b>Atp1a1</b>   | <b>0.8142482</b> |
|  |                                             | <b>18750</b>  | <b>Prkca</b>    | <b>0.8534241</b> |
|  |                                             | <b>11512</b>  | <b>Adcy6</b>    | <b>0.9676566</b> |
|  |                                             | <b>56373</b>  | <b>Cpb2</b>     | <b>1.0812315</b> |
|  |                                             | <b>11931</b>  | <b>Atp1b1</b>   | <b>1.1773769</b> |
|  |                                             | <b>26565</b>  | <b>Pla2g10</b>  | <b>1.2183728</b> |
|  |                                             | <b>12349</b>  | <b>Car2</b>     | <b>1.2188992</b> |
|  |                                             | <b>69836</b>  | <b>Pla2g12b</b> | <b>1.3402796</b> |
|  |                                             | <b>53313</b>  | <b>Atp2a3</b>   | <b>1.7509815</b> |
|  |                                             | <b>18781</b>  | <b>Pla2g2c</b>  | <b>1.9491762</b> |
|  |                                             | <b>12638</b>  | <b>Cftr</b>     | <b>1.9525208</b> |
|  |                                             | <b>13487</b>  | <b>Slc26a3</b>  | <b>2.3676917</b> |
|  |                                             | <b>23844</b>  | <b>Clca1</b>    | <b>4.0815394</b> |
|  | Amino sugar and nucleotide sugar metabolism | 14584         | Gfpt2           | -1.78616         |
|  |                                             | 19703         | Renbp           | -0.86803         |
|  |                                             | 212032        | Hk3             | -0.73564         |

|  |                                  |               |                |                 |
|--|----------------------------------|---------------|----------------|-----------------|
|  |                                  | <b>110119</b> | <b>Mpi</b>     | <b>0.632236</b> |
|  |                                  | <b>66681</b>  | <b>Pgm1</b>    | <b>0.657773</b> |
|  |                                  | <b>234730</b> | <b>Fuk</b>     | <b>0.666565</b> |
|  |                                  | <b>94181</b>  | <b>Nans</b>    | <b>0.695492</b> |
|  |                                  | <b>22122</b>  | <b>Tsta3</b>   | <b>0.721833</b> |
|  |                                  | <b>75540</b>  | <b>Fpgt</b>    | <b>0.783654</b> |
|  |                                  | <b>109785</b> | <b>Pgm3</b>    | <b>0.786082</b> |
|  |                                  | <b>54342</b>  | <b>Gnpnat1</b> | <b>0.79167</b>  |
|  |                                  | <b>69976</b>  | <b>Galk2</b>   | <b>0.798675</b> |
|  |                                  | <b>12764</b>  | <b>Cmas</b>    | <b>0.861057</b> |
|  |                                  | <b>22235</b>  | <b>Ugdh</b>    | <b>0.911553</b> |
|  |                                  | <b>74246</b>  | <b>Gale</b>    | <b>1.07737</b>  |
|  |                                  | <b>54128</b>  | <b>Pmm2</b>    | <b>1.235963</b> |
|  |                                  | <b>14583</b>  | <b>Gfpt1</b>   | <b>1.453114</b> |
|  |                                  | <b>50798</b>  | <b>Gne</b>     | <b>1.507443</b> |
|  |                                  | <b>218138</b> | <b>Gmgs</b>    | <b>1.515681</b> |
|  | Protein digestion and absorption | 103964        | Try5           | -6.95841        |
|  |                                  | 22074         | Try4           | -6.80598        |
|  |                                  | 109697        | Cpa1           | -6.50643        |
|  |                                  | 22072         | Prss2          | -6.4655         |
|  |                                  | 1E+08         | Gm10334        | -5.43591        |
|  |                                  | 17380         | Mme            | -1.71403        |
|  |                                  | 12842         | Col1a1         | -1.2469         |
|  |                                  | 12831         | Col5a1         | -1.22051        |
|  |                                  | 12827         | Col4a2         | -1.12303        |
|  |                                  | 27222         | Atp1a4         | -1.09805        |
|  |                                  | 12826         | Col4a1         | -1.04373        |
|  |                                  | 12822         | Col18a1        | -0.99187        |
|  |                                  | 12818         | Col14a1        | -0.81313        |
|  |                                  | 11933         | Atp1b3         | -0.76755        |
|  |                                  | 12832         | Col5a2         | -0.70187        |
|  |                                  | 12814         | Col11a1        | -0.59561        |
|  |                                  | <b>110893</b> | <b>Slc8a3</b>  | <b>0.744391</b> |
|  |                                  | <b>11928</b>  | <b>Atp1a1</b>  | <b>0.814248</b> |
|  |                                  | <b>170745</b> | <b>Xpnpep2</b> | <b>1.009864</b> |
|  |                                  | <b>56373</b>  | <b>Cpb2</b>    | <b>1.081231</b> |
|  |                                  | <b>11931</b>  | <b>Atp1b1</b>  | <b>1.177377</b> |
|  |                                  | <b>17288</b>  | <b>Mep1b</b>   | <b>1.317645</b> |
|  |                                  | <b>57442</b>  | <b>Kcne3</b>   | <b>1.326414</b> |
|  |                                  | <b>30962</b>  | <b>Slc7a9</b>  | <b>1.507333</b> |
|  |                                  | <b>16529</b>  | <b>Kcnk5</b>   | <b>1.67479</b>  |

|                                 |                                      |               |                |                 |
|---------------------------------|--------------------------------------|---------------|----------------|-----------------|
|                                 |                                      | <b>105243</b> | <b>Slc9a3</b>  | <b>2.762093</b> |
|                                 |                                      | <b>20532</b>  | <b>Slc3a1</b>  | <b>3.223735</b> |
|                                 |                                      | <b>17287</b>  | <b>Mep1a</b>   | <b>4.972591</b> |
|                                 | Mineral absorption                   | 320718        | Slc26a9        | -3.26554        |
|                                 |                                      | 15368         | Hmox1          | -1.6416         |
|                                 |                                      | 27222         | Atp1a4         | -1.09805        |
|                                 |                                      | 18173         | Slc11a1        | -1.04758        |
|                                 |                                      | 17748         | Mt1            | -1.03798        |
|                                 |                                      | 74051         | Steap2         | -0.91737        |
|                                 |                                      | 70358         | Steap1         | -0.81693        |
|                                 |                                      | 11933         | Atp1b3         | -0.76755        |
|                                 |                                      | <b>67972</b>  | <b>Atp2b1</b>  | <b>0.66991</b>  |
|                                 |                                      | <b>20537</b>  | <b>Slc5a1</b>  | <b>0.762464</b> |
|                                 |                                      | <b>11928</b>  | <b>Atp1a1</b>  | <b>0.814248</b> |
|                                 |                                      | <b>11931</b>  | <b>Atp1b1</b>  | <b>1.177377</b> |
|                                 |                                      | <b>15203</b>  | <b>Heph</b>    | <b>1.252356</b> |
|                                 |                                      | <b>72027</b>  | <b>Slc39a4</b> | <b>1.359697</b> |
|                                 |                                      | <b>22337</b>  | <b>Vdr</b>     | <b>1.692396</b> |
|                                 |                                      | <b>53945</b>  | <b>Slc40a1</b> | <b>1.796217</b> |
|                                 |                                      | <b>225997</b> | <b>Trpm6</b>   | <b>1.834091</b> |
|                                 |                                      | <b>12724</b>  | <b>Clcn2</b>   | <b>2.092737</b> |
|                                 |                                      | <b>13487</b>  | <b>Slc26a3</b> | <b>2.367692</b> |
|                                 |                                      | <b>105243</b> | <b>Slc9a3</b>  | <b>2.762093</b> |
|                                 |                                      | <b>12309</b>  | <b>S100g</b>   | <b>4.31916</b>  |
| Endocrine and metabolic disease | Maturity onset diabetes of the young | <b>21410</b>  | <b>Hnf1b</b>   | <b>0.742425</b> |
|                                 |                                      | <b>15205</b>  | <b>Hes1</b>    | <b>0.823965</b> |
|                                 |                                      | <b>18508</b>  | <b>Pax6</b>    | <b>0.887141</b> |
|                                 |                                      | <b>21405</b>  | <b>Hnf1a</b>   | <b>1.191427</b> |
|                                 |                                      | <b>15377</b>  | <b>Foxa3</b>   | <b>1.231398</b> |
|                                 |                                      | <b>30942</b>  | <b>Hnf4g</b>   | <b>1.294742</b> |
|                                 |                                      | <b>18770</b>  | <b>Pklr</b>    | <b>1.664678</b> |
|                                 |                                      | <b>18506</b>  | <b>Pax4</b>    | <b>1.687499</b> |
|                                 |                                      | <b>15376</b>  | <b>Foxa2</b>   | <b>1.894105</b> |
|                                 |                                      | <b>18012</b>  | <b>Neurod1</b> | <b>2.067547</b> |
|                                 |                                      | <b>26424</b>  | <b>Nr5a2</b>   | <b>2.1028</b>   |
|                                 |                                      | <b>18088</b>  | <b>Nkx2-2</b>  | <b>2.111146</b> |
|                                 |                                      | <b>15378</b>  | <b>Hnf4a</b>   | <b>2.913687</b> |
| Muscle contraction              | Striated Muscle Contraction          | 21925         | Tnnc2          | -4.38071        |
|                                 |                                      | 21957         | Tnnt3          | -4.1188         |
|                                 |                                      | 17897         | Myl3           | -3.65672        |
|                                 |                                      | 17996         | Neb            | -3.50566        |

|                  |                           |        |         |          |
|------------------|---------------------------|--------|---------|----------|
|                  |                           | 17885  | Myh8    | -3.40606 |
|                  |                           | 21393  | Tcap    | -3.13716 |
|                  |                           | 233199 | Mybpc2  | -2.922   |
|                  |                           | 21953  | Tnni2   | -2.80414 |
|                  |                           | 17901  | Myl1    | -2.50815 |
|                  |                           | 11472  | Actn2   | -2.42883 |
|                  |                           | 109272 | Mybpc1  | -2.17576 |
|                  |                           | 22138  | Ttn     | -1.98538 |
|                  |                           | 21924  | Tnnc1   | -0.96121 |
|                  |                           | 22352  | Vim     | -0.7463  |
|                  |                           | 17868  | Mybpc3  | -0.60747 |
|                  |                           | 21952  | Tnni1   | 1.979125 |
|                  | Muscle contraction        | 21925  | Tnnc2   | -4.38071 |
|                  |                           | 21957  | Tnnt3   | -4.1188  |
|                  |                           | 17897  | Myl3    | -3.65672 |
|                  |                           | 17996  | Neb     | -3.50566 |
|                  |                           | 17885  | Myh8    | -3.40606 |
|                  |                           | 21393  | Tcap    | -3.13716 |
|                  |                           | 233199 | Mybpc2  | -2.922   |
|                  |                           | 21953  | Tnni2   | -2.80414 |
|                  |                           | 17901  | Myl1    | -2.50815 |
|                  |                           | 11472  | Actn2   | -2.42883 |
|                  |                           | 109272 | Mybpc1  | -2.17576 |
|                  |                           | 22138  | Ttn     | -1.98538 |
|                  |                           | 21924  | Tnnc1   | -0.96121 |
|                  |                           | 22352  | Vim     | -0.7463  |
|                  |                           | 17868  | Mybpc3  | -0.60747 |
|                  |                           | 12313  | Calm1   | 0.865731 |
|                  |                           | 21952  | Tnni1   | 1.979125 |
| Bone development | Endochondral Ossification | 17386  | Mmp13   | -3.04753 |
|                  |                           | 11504  | Adamts1 | -2.10667 |
|                  |                           | 17395  | Mmp9    | -1.95523 |
|                  |                           | 14172  | Fgf18   | -1.82915 |
|                  |                           | 18791  | Plat    | -1.49905 |
|                  |                           | 23794  | Adamts5 | -1.48121 |
|                  |                           | 14173  | Fgf2    | -1.4179  |
|                  |                           | 58250  | Chst11  | -1.36561 |
|                  |                           | 11647  | Alpl    | -1.22751 |
|                  |                           | 12162  | Bmp7    | -1.15597 |
|                  |                           | 19227  | Pthlh   | -1.14587 |
|                  |                           | 17313  | Mgp     | -1.01976 |

|  |                                                           |        |               |          |
|--|-----------------------------------------------------------|--------|---------------|----------|
|  |                                                           | 18214  | Ddr2          | -0.98714 |
|  |                                                           | 18792  | Plau          | -0.88465 |
|  |                                                           | 12577  | Cdkn1c        | -0.84685 |
|  |                                                           | 13039  | Ctsl          | -0.75546 |
|  |                                                           | 14634  | Gli3          | -0.74002 |
|  |                                                           | 21859  | Timp3         | -0.70261 |
|  |                                                           | 14182  | Fgfr1         | -0.69788 |
|  |                                                           | 19228  | Pth1r         | -0.61805 |
|  |                                                           | 12283  | Cab39         | 0.755627 |
|  |                                                           | 12313  | Calm1         | 0.865731 |
|  |                                                           | 20682  | Sox9          | 1.271387 |
|  |                                                           | 20259  | Scin          | 1.945651 |
|  |                                                           | 16147  | lhh           | 2.452108 |
|  | Endocrine and other factor-regulated calcium reabsorption | 27222  | Atp1a4        | -1.09805 |
|  |                                                           | 12062  | <i>Bdkrb2</i> | -0.94312 |
|  |                                                           | 11933  | Atp1b3        | -0.76755 |
|  |                                                           | 19228  | Pth1r         | -0.61805 |
|  |                                                           | 13982  | <i>Esr1</i>   | -0.60087 |
|  |                                                           | 67972  | Atp2b1        | 0.66991  |
|  |                                                           | 11928  | Atp1a1        | 0.814248 |
|  |                                                           | 18750  | Prkca         | 0.853424 |
|  |                                                           | 11512  | Adcy6         | 0.967657 |
|  |                                                           | 11931  | Atp1b1        | 1.177377 |
|  |                                                           | 22337  | Vdr           | 1.692396 |
|  |                                                           | 16616  | Klk1b21       | 1.750316 |
|  |                                                           | 16622  | Klk1b5        | 2.161531 |
|  |                                                           | 16617  | Klk1b24       | 2.162845 |
|  |                                                           | 16624  | Klk1b8        | 2.270613 |
|  |                                                           | 16618  | Klk1b26       | 2.295813 |
|  |                                                           | 18050  | Klk1b3        | 2.316179 |
|  |                                                           | 16612  | Klk1          | 2.390543 |
|  |                                                           | 13646  | Klk1b22       | 2.562583 |
|  | Calcium signalling pathway                                | 21925  | Tnnc2         | -4.38071 |
|  |                                                           | 228785 | Mylk2         | -2.14324 |
|  |                                                           | 20698  | <i>Sphk1</i>  | -1.83599 |
|  |                                                           | 12292  | Cacna1s       | -1.83224 |
|  |                                                           | 11541  | Adora2b       | -1.82001 |
|  |                                                           | 11937  | Atp2a1        | -1.7412  |
|  |                                                           | 12182  | Bst1          | -1.52749 |
|  |                                                           | 54140  | Avpr1a        | -1.40933 |
|  |                                                           | 19220  | Ptgfr         | -1.35934 |

|                        |                                                                                                     |        |               |          |
|------------------------|-----------------------------------------------------------------------------------------------------|--------|---------------|----------|
|                        |                                                                                                     | 18127  | Nos3          | -1.23655 |
|                        |                                                                                                     | 20190  | Ryr1          | -1.18304 |
|                        |                                                                                                     | 19218  | Ptger3        | -1.17597 |
|                        |                                                                                                     | 104110 | Adcy4         | -1.16978 |
|                        |                                                                                                     | 21336  | Tacr1         | -1.16015 |
|                        |                                                                                                     | 210044 | Adcy2         | -0.99756 |
|                        |                                                                                                     | 94045  | P2rx5         | -0.96585 |
|                        |                                                                                                     | 21924  | Tnnc1         | -0.96121 |
|                        |                                                                                                     | 12062  | <i>Bdkrb2</i> | -0.94312 |
|                        |                                                                                                     | 18596  | Pdgfrb        | -0.9223  |
|                        |                                                                                                     | 13617  | Ednra         | -0.86901 |
|                        |                                                                                                     | 11555  | Adrb2         | -0.84979 |
|                        |                                                                                                     | 11540  | Adora2a       | -0.8378  |
|                        |                                                                                                     | 18439  | P2rx7         | -0.81755 |
|                        |                                                                                                     | 11739  | Slc25a4       | -0.7536  |
|                        |                                                                                                     | 19204  | Ptafr         | -0.72302 |
|                        |                                                                                                     | 12061  | Bdkrb1        | -0.60327 |
|                        |                                                                                                     | 18575  | Pde1c         | 0.585316 |
|                        |                                                                                                     | 16440  | Itpr3         | 0.627204 |
|                        |                                                                                                     | 67972  | Atp2b1        | 0.66991  |
|                        |                                                                                                     | 102093 | Phkb          | 0.676941 |
|                        |                                                                                                     | 20866  | Stim1         | 0.683955 |
|                        |                                                                                                     | 110893 | Slc8a3        | 0.744391 |
|                        |                                                                                                     | 13866  | <i>Erb2</i>   | 0.817359 |
|                        |                                                                                                     | 18750  | Prkca         | 0.853424 |
|                        |                                                                                                     | 12313  | Calm1         | 0.865731 |
|                        |                                                                                                     | 74055  | Plce1         | 0.876211 |
|                        |                                                                                                     | 14672  | Gna11         | 0.925661 |
|                        |                                                                                                     | 15562  | Htr4          | 0.991937 |
|                        |                                                                                                     | 13867  | <i>Erb3</i>   | 1.114448 |
|                        |                                                                                                     | 18679  | Phka1         | 1.193311 |
|                        |                                                                                                     | 21337  | Tacr2         | 1.265931 |
|                        |                                                                                                     | 54652  | Cacna1f       | 1.342953 |
|                        |                                                                                                     | 228550 | Itпка         | 1.497681 |
|                        |                                                                                                     | 53313  | Atp2a3        | 1.750981 |
|                        |                                                                                                     | 16867  | Lhcgr         | 1.871822 |
|                        |                                                                                                     | 14829  | Grpr          | 2.004654 |
| Transport of molecules | Transport of glucose and other sugars, bile salts and organic acids, metal ions and amine compounds | 75750  | Slc10a6       | -2.13402 |
|                        |                                                                                                     | 80879  | Slc16a3       | -1.57048 |
|                        |                                                                                                     | 14411  | Slc6a12       | -1.46674 |
|                        |                                                                                                     | 12870  | Cp            | -1.32586 |

|  |                       |        |          |          |
|--|-----------------------|--------|----------|----------|
|  |                       | 230810 | Slc30a2  | -1.29338 |
|  |                       | 213053 | Slc39a14 | -1.29001 |
|  |                       | 30805  | Slc22a4  | -1.19745 |
|  |                       | 18173  | Slc11a1  | -1.04758 |
|  |                       | 227059 | Slc39a10 | -0.94369 |
|  |                       | 106957 | Slc39a6  | -0.83374 |
|  |                       | 20527  | Slc2a3   | -0.77539 |
|  |                       | 353169 | Slc2a12  | -0.75386 |
|  |                       | 56517  | Slc22a21 | 0.635002 |
|  |                       | 20520  | Slc22a5  | 0.676375 |
|  |                       | 20537  | Slc5a1   | 0.762464 |
|  |                       | 233836 | Slc5a11  | 1.052542 |
|  |                       | 53881  | Slc5a3   | 1.053722 |
|  |                       | 213603 | Slc44a3  | 1.11154  |
|  |                       | 15203  | Heph     | 1.252356 |
|  |                       | 72027  | Slc39a4  | 1.359697 |
|  |                       | 18400  | Slc22a18 | 1.470949 |
|  |                       | 20517  | Slc22a1  | 1.679911 |
|  |                       | 110877 | Slc18a1  | 1.691706 |
|  |                       | 53945  | Slc40a1  | 1.796217 |
|  |                       | 70129  | Slc44a4  | 2.016854 |
|  |                       | 72002  | Slc39a5  | 2.180762 |
|  |                       | 55961  | Slc13a1  | 2.29241  |
|  |                       | 56774  | Slc6a14  | 2.523776 |
|  |                       | 20500  | Slc13a2  | 3.892954 |
|  | Ion channel transport | 11937  | Atp2a1   | -1.7412  |
|  |                       | 20190  | Ryr1     | -1.18304 |
|  |                       | 22068  | Trpc6    | -1.17226 |
|  |                       | 27222  | Atp1a4   | -1.09805 |
|  |                       | 54667  | Atp8b2   | -1.03066 |
|  |                       | 63873  | Trpv4    | -0.95688 |
|  |                       | 17178  | Fxyd3    | -0.93915 |
|  |                       | 11982  | Atp10a   | -0.90694 |
|  |                       | 11933  | Atp1b3   | -0.76755 |
|  |                       | 105722 | Ano6     | -0.75203 |
|  |                       | 56188  | Fxyd1    | -0.69905 |
|  |                       | 14605  | Tsc22d3  | -0.69762 |
|  |                       | 20276  | Scnn1a   | 0.599167 |
|  |                       | 12725  | Clcn3    | 0.609869 |
|  |                       | 67972  | Atp2b1   | 0.66991  |
|  |                       | 338370 | Nalcn    | 0.743838 |

|  |                                            |        |          |          |
|--|--------------------------------------------|--------|----------|----------|
|  |                                            | 76295  | Atp11b   | 0.76297  |
|  |                                            | 102566 | Ano10    | 0.769236 |
|  |                                            | 69847  | Wnk4     | 0.805242 |
|  |                                            | 11928  | Atp1a1   | 0.814248 |
|  |                                            | 71345  | Ano9     | 0.888618 |
|  |                                            | 329178 | Unc80    | 0.912872 |
|  |                                            | 54670  | Atp8b1   | 1.002619 |
|  |                                            | 17364  | Trpm1    | 1.029013 |
|  |                                            | 252972 | Tpcn1    | 1.060119 |
|  |                                            | 11931  | Atp1b1   | 1.177377 |
|  |                                            | 241118 | Asic4    | 1.193495 |
|  |                                            | 27219  | Sgk2     | 1.31348  |
|  |                                            | 404545 | Ano7     | 1.334749 |
|  |                                            | 69047  | Atp2c2   | 1.358197 |
|  |                                            | 68667  | Trpm4    | 1.406567 |
|  |                                            | 53313  | Atp2a3   | 1.750981 |
|  |                                            | 225997 | Trpm6    | 1.834091 |
|  |                                            | 12724  | Clcn2    | 2.092737 |
|  |                                            | 14395  | Gabra2   | 2.629172 |
|  | Ion transport by P-type ATPases            | 11937  | Atp2a1   | -1.7412  |
|  |                                            | 27222  | Atp1a4   | -1.09805 |
|  |                                            | 54667  | Atp8b2   | -1.03066 |
|  |                                            | 17178  | Fxyd3    | -0.93915 |
|  |                                            | 11982  | Atp10a   | -0.90694 |
|  |                                            | 11933  | Atp1b3   | -0.76755 |
|  |                                            | 56188  | Fxyd1    | -0.69905 |
|  |                                            | 67972  | Atp2b1   | 0.66991  |
|  |                                            | 76295  | Atp11b   | 0.76297  |
|  |                                            | 11928  | Atp1a1   | 0.814248 |
|  |                                            | 54670  | Atp8b1   | 1.002619 |
|  |                                            | 11931  | Atp1b1   | 1.177377 |
|  |                                            | 69047  | Atp2c2   | 1.358197 |
|  |                                            | 53313  | Atp2a3   | 1.750981 |
|  | Organic cation transport                   | 30805  | Slc22a4  | -1.19745 |
|  |                                            | 56517  | Slc22a21 | 0.635002 |
|  |                                            | 20520  | Slc22a5  | 0.676375 |
|  |                                            | 18400  | Slc22a18 | 1.470949 |
|  |                                            | 20517  | Slc22a1  | 1.679911 |
|  | Transmembrane transport of small molecules | 320718 | Slc26a9  | -3.26554 |
|  |                                            | 11828  | Aqp3     | -2.8076  |
|  |                                            | 140494 | Atp6v0a4 | -2.39619 |



|  |  |        |          |          |
|--|--|--------|----------|----------|
|  |  | 75750  | Slc10a6  | -2.13402 |
|  |  | 11937  | Atp2a1   | -1.7412  |
|  |  | 15368  | Hmox1    | -1.6416  |
|  |  | 80879  | Slc16a3  | -1.57048 |
|  |  | 14411  | Slc6a12  | -1.46674 |
|  |  | 12870  | Cp       | -1.32586 |
|  |  | 230810 | Slc30a2  | -1.29338 |
|  |  | 213053 | Slc39a14 | -1.29001 |
|  |  | 30805  | Slc22a4  | -1.19745 |
|  |  | 20928  | Abcc9    | -1.18331 |
|  |  | 20190  | Ryr1     | -1.18304 |
|  |  | 22068  | Trpc6    | -1.17226 |
|  |  | 104110 | Adcy4    | -1.16978 |
|  |  | 27222  | Atp1a4   | -1.09805 |
|  |  | 239273 | Abcc4    | -1.08389 |
|  |  | 18173  | Slc11a1  | -1.04758 |
|  |  | 54667  | Atp8b2   | -1.03066 |
|  |  | 210044 | Adcy2    | -0.99756 |
|  |  | 242607 | Slc1a7   | -0.97491 |
|  |  | 63873  | Trpv4    | -0.95688 |
|  |  | 64008  | Aqp9     | -0.95331 |
|  |  | 227059 | Slc39a10 | -0.94369 |
|  |  | 17178  | Fxyd3    | -0.93915 |
|  |  | 20498  | Slc12a4  | -0.92154 |
|  |  | 11982  | Atp10a   | -0.90694 |
|  |  | 11307  | Abcg1    | -0.88402 |
|  |  | 106957 | Slc39a6  | -0.83374 |
|  |  | 330836 | Slc7a6   | -0.78741 |
|  |  | 20527  | Slc2a3   | -0.77539 |
|  |  | 11933  | Atp1b3   | -0.76755 |
|  |  | 353169 | Slc2a12  | -0.75386 |
|  |  | 105722 | Ano6     | -0.75203 |
|  |  | 212032 | Hk3      | -0.73564 |
|  |  | 14709  | Gng8     | -0.72016 |
|  |  | 13340  | Slc29a2  | -0.71226 |
|  |  | 56188  | Fxyd1    | -0.69905 |
|  |  | 14605  | Tsc22d3  | -0.69762 |
|  |  | 14708  | Gng7     | -0.64044 |
|  |  | 100561 | Slc15a4  | 0.58711  |
|  |  | 20276  | Scnn1a   | 0.599167 |
|  |  | 12725  | Clcn3    | 0.609869 |

|  |  |        |          |          |
|--|--|--------|----------|----------|
|  |  | 56517  | Slc22a21 | 0.635002 |
|  |  | 67972  | Atp2b1   | 0.66991  |
|  |  | 20520  | Slc22a5  | 0.676375 |
|  |  | 338370 | Nalcn    | 0.743838 |
|  |  | 110893 | Slc8a3   | 0.744391 |
|  |  | 21871  | Atp6v0a2 | 0.760918 |
|  |  | 20537  | Slc5a1   | 0.762464 |
|  |  | 76295  | Atp11b   | 0.76297  |
|  |  | 102566 | Ano10    | 0.769236 |
|  |  | 69847  | Wnk4     | 0.805242 |
|  |  | 11928  | Atp1a1   | 0.814248 |
|  |  | 208890 | Slc26a7  | 0.833579 |
|  |  | 20499  | Slc12a7  | 0.880019 |
|  |  | 71345  | Ano9     | 0.888618 |
|  |  | 26357  | Abcg2    | 0.910726 |
|  |  | 329178 | Unc80    | 0.912872 |
|  |  | 18669  | Abcb1b   | 0.947346 |
|  |  | 11512  | Adcy6    | 0.967657 |
|  |  | 224814 | Abcc10   | 0.996532 |
|  |  | 54670  | Atp8b1   | 1.002619 |
|  |  | 218756 | Slc4a7   | 1.018249 |
|  |  | 17364  | Trpm1    | 1.029013 |
|  |  | 229782 | Slc35a3  | 1.036432 |
|  |  | 233836 | Slc5a11  | 1.052542 |
|  |  | 53881  | Slc5a3   | 1.053722 |
|  |  | 252972 | Tpcn1    | 1.060119 |
|  |  | 235504 | Slc17a5  | 1.067807 |
|  |  | 27376  | Slc25a10 | 1.077187 |
|  |  | 213603 | Slc44a3  | 1.11154  |
|  |  | 24060  | Slc35a1  | 1.142999 |
|  |  | 11931  | Atp1b1   | 1.177377 |
|  |  | 76408  | Abcc3    | 1.189916 |
|  |  | 241118 | Asic4    | 1.193495 |
|  |  | 15203  | Heph     | 1.252356 |
|  |  | 27219  | Sgk2     | 1.31348  |
|  |  | 404545 | Ano7     | 1.334749 |
|  |  | 12000  | Avpr2    | 1.346946 |
|  |  | 69047  | Atp2c2   | 1.358197 |
|  |  | 72027  | Slc39a4  | 1.359697 |
|  |  | 18671  | Abcb1a   | 1.373398 |
|  |  | 68667  | Trpm4    | 1.406567 |

|  |  |        |          |          |
|--|--|--------|----------|----------|
|  |  | 18400  | Slc22a18 | 1.470949 |
|  |  | 30962  | Slc7a9   | 1.507333 |
|  |  | 66333  | Aqp11    | 1.509709 |
|  |  | 27421  | Abcc6    | 1.537954 |
|  |  | 20517  | Slc22a1  | 1.679911 |
|  |  | 110877 | Slc18a1  | 1.691706 |
|  |  | 53313  | Atp2a3   | 1.750981 |
|  |  | 53945  | Slc40a1  | 1.796217 |
|  |  | 225997 | Trpm6    | 1.834091 |
|  |  | 13521  | Slc26a2  | 1.912715 |
|  |  | 12638  | Cftr     | 1.952521 |
|  |  | 28254  | Slco1a6  | 1.98067  |
|  |  | 70129  | Slc44a4  | 2.016854 |
|  |  | 12724  | Cln2     | 2.092737 |
|  |  | 216225 | Slc5a8   | 2.146749 |
|  |  | 72002  | Slc39a5  | 2.180762 |
|  |  | 55961  | Slc13a1  | 2.29241  |
|  |  | 13487  | Slc26a3  | 2.367692 |
|  |  | 56774  | Slc6a14  | 2.523776 |
|  |  | 14395  | Gabra2   | 2.629172 |
|  |  | 105243 | Slc9a3   | 2.762093 |
|  |  | 226999 | Slc9a2   | 2.868787 |
|  |  | 20532  | Slc3a1   | 3.223735 |
|  |  | 11833  | Aqp8     | 3.844864 |
|  |  | 20500  | Slc13a2  | 3.892954 |

**Supplementary Table 3:** Details results of ORA after 14 days of exposure of E171 in BALB/c mice in combination with AOM/DSS. Numbers in bold correspond to upregulated genes. Log2FC= Log2 fold change obtained with LIMMA script with correction for its own time-matched control.

| Group of pathways | Pathways               | EntrezGeneID | Genes    | Log2FC   |
|-------------------|------------------------|--------------|----------|----------|
| Signalling        | Olfactory transduction | 258811       | Olfr926  | -4.64876 |
|                   |                        | 258358       | Olfr557  | -3.78887 |
|                   |                        | 259072       | Olfr686  | -3.21602 |
|                   |                        | 258800       | Olfr905  | -2.8355  |
|                   |                        | 258989       | Olfr457  | -2.76885 |
|                   |                        | 258836       | Olfr272  | -2.73318 |
|                   |                        | 258729       | Olfr478  | -2.64268 |
|                   |                        | 258320       | Olfr1232 | -2.62691 |
|                   |                        | 258621       | Olfr344  | -2.57238 |
|                   |                        | 258371       | Olfr368  | -2.41772 |
|                   |                        | 258775       | Olfr196  | -2.4027  |
|                   |                        | 258177       | Olfr1222 | -2.34283 |
|                   |                        | 258429       | Olfr996  | -2.2195  |
|                   |                        | 258577       | Olfr1026 | -2.18809 |
|                   |                        | 227789       | Olfr358  | -2.16778 |
|                   |                        | 257912       | Olfr948  | -2.16021 |
|                   |                        | 404222       | Olfr231  | -2.03002 |
|                   |                        | 258982       | Olfr1272 | -2.01257 |
|                   |                        | 258674       | Olfr1427 | -1.9539  |
|                   |                        | 258315       | Olfr767  | -1.94937 |
|                   |                        | 259071       | Olfr166  | -1.91143 |
|                   |                        | 18332        | Olfr33   | -1.90223 |
|                   |                        | 258025       | Olfr1211 | -1.8169  |
|                   |                        | 258734       | Olfr502  | -1.70538 |
|                   |                        | 258807       | Olfr910  | -1.69483 |
|                   |                        | 170639       | Olfr78   | -1.69158 |
|                   |                        | 258649       | Olfr441  | -1.68312 |
|                   |                        | 258880       | Olfr218  | -1.66686 |
|                   |                        | 258563       | Olfr1006 | -1.61089 |
|                   |                        | 258559       | Olfr830  | -1.58115 |
| 258350            | Olfr706                | -1.56576     |          |          |
| 258939            | Olfr63                 | -1.53883     |          |          |
| 18344             | Olfr45                 | -1.52067     |          |          |
| 258910            | Olfr1280               | -1.52065     |          |          |

|  |  |        |                  |          |
|--|--|--------|------------------|----------|
|  |  | 258560 | Olfr843          | -1.51915 |
|  |  | 258744 | Olfr875          | -1.49692 |
|  |  | 18365  | Olfr65           | -1.48665 |
|  |  | 258273 | Olfr1394         | -1.48421 |
|  |  | 258465 | Olfr1387         | -1.39693 |
|  |  | 258737 | Olfr1316         | -1.36997 |
|  |  | 258343 | Olfr397          | -1.36572 |
|  |  | 258629 | Olfr1487         | -1.34557 |
|  |  | 258932 | Olfr791          | -1.3421  |
|  |  | 258173 | Olfr1532-<br>ps1 | -1.3396  |
|  |  | 258785 | Olfr1230         | -1.32246 |
|  |  | 258962 | Olfr53           | -1.3223  |
|  |  | 259033 | Olfr1122         | -1.3054  |
|  |  | 258028 | Olfr901          | -1.2159  |
|  |  | 18346  | Olfr47           | -1.18329 |
|  |  | 258511 | Olfr523          | -1.17449 |
|  |  | 258334 | Olfr1396         | -1.15271 |
|  |  | 258525 | Olfr1170         | -1.14879 |
|  |  | 259041 | Olfr1414         | -1.14487 |
|  |  | 258704 | Olfr411          | -1.13571 |
|  |  | 233649 | Cnga4            | -1.13302 |
|  |  | 258417 | Olfr470          | -1.13038 |
|  |  | 545985 | Olfr612          | -1.12476 |
|  |  | 259116 | Olfr559          | -1.10927 |
|  |  | 258808 | Olfr620          | -1.1068  |
|  |  | 258705 | Olfr398          | -1.09713 |
|  |  | 258281 | Olfr780          | -1.09618 |
|  |  | 258791 | Olfr812          | -1.08902 |
|  |  | 258055 | Olfr524          | -1.01384 |
|  |  | 258271 | Olfr1311         | -1.0065  |
|  |  | 258151 | Olfr1505         | -0.97509 |
|  |  | 258991 | Olfr1496         | -0.94303 |
|  |  | 107477 | Guca1b           | -0.85852 |
|  |  | 259113 | Olfr577          | -0.80041 |
|  |  | 258718 | Olfr513          | -0.77543 |
|  |  | 258505 | Olfr97           | -0.74544 |
|  |  | 258782 | Olfr914          | -0.74005 |
|  |  | 258290 | Olfr1143         | -0.71076 |
|  |  | 258198 | Olfr224          | -0.70859 |
|  |  | 18749  | Prkacb           | -0.69222 |
|  |  | 57269  | Olfr1507         | -0.68481 |

|  |  |               |                |                 |
|--|--|---------------|----------------|-----------------|
|  |  | 258949        | Olfr338        | -0.68418        |
|  |  | 258615        | Olfr360        | -0.67571        |
|  |  | <b>258552</b> | <b>Olfr868</b> | <b>0.63894</b>  |
|  |  | 56860         | Olfr690        | 0.643344        |
|  |  | <b>383243</b> | <b>Olfr128</b> | <b>0.686736</b> |
|  |  | 258463        | Olfr1393       | 0.6995          |
|  |  | 258801        | Olfr907        | 0.701786        |
|  |  | 258652        | Olfr1131       | 0.710637        |
|  |  | 259119        | Olfr578        | 0.71483         |
|  |  | 258728        | Olfr482        | 0.7194          |
|  |  | 18322         | Olfr24         | 0.762628        |
|  |  | 110511        | Olfr153        | 0.805912        |
|  |  | 258248        | Olfr576        | 0.852716        |
|  |  | 258487        | Olfr722        | 0.875545        |
|  |  | 259053        | Olfr362        | 0.886359        |
|  |  | 57271         | Olfr1509       | 0.887           |
|  |  | 258269        | Olfr930        | 0.892154        |
|  |  | 258224        | Olfr1358       | 0.900034        |
|  |  | 18331         | Olfr32         | 0.906447        |
|  |  | 258392        | Olfr190        | 0.908549        |
|  |  | 258512        | Olfr530        | 0.917809        |
|  |  | 258913        | Olfr1377       | 0.930402        |
|  |  | 258499        | Olfr945        | 0.933335        |
|  |  | 258625        | Olfr116        | 0.941665        |
|  |  | 258825        | Olfr975        | 0.944944        |
|  |  | 257959        | Olfr1537       | 0.981626        |
|  |  | 258518        | Olfr847        | 0.99196         |
|  |  | 233670        | Olfr6          | 1.010129        |
|  |  | 259000        | Olfr195        | 1.024429        |
|  |  | 258492        | Olfr484        | 1.030595        |
|  |  | 257932        | Olfr332        | 1.038775        |
|  |  | 258201        | Olfr538        | 1.081171        |
|  |  | 258544        | Olfr788        | 1.082466        |
|  |  | 634104        | Olfr287        | 1.082896        |
|  |  | 258665        | Olfr815        | 1.09629         |
|  |  | 258507        | Olfr96         | 1.112944        |
|  |  | 258882        | Olfr874        | 1.141852        |
|  |  | 258602        | Olfr150        | 1.145491        |
|  |  | 258722        | Olfr611        | 1.165157        |
|  |  | 259006        | Olfr399        | 1.169014        |
|  |  | 258984        | Olfr1257       | 1.187363        |

|  |                            |        |          |          |
|--|----------------------------|--------|----------|----------|
|  |                            | 259064 | Olfr124  | 1.197695 |
|  |                            | 257909 | Olfr735  | 1.237712 |
|  |                            | 258799 | Olfr906  | 1.243894 |
|  |                            | 259114 | Olfr570  | 1.248525 |
|  |                            | 258877 | Olfr1395 | 1.255895 |
|  |                            | 258751 | Olfr608  | 1.280827 |
|  |                            | 117005 | Olfr74   | 1.29757  |
|  |                            | 258694 | Olfr1445 | 1.302618 |
|  |                            | 258851 | Olfr1339 | 1.339229 |
|  |                            | 257890 | Olfr12   | 1.339785 |
|  |                            | 258661 | Olfr740  | 1.341121 |
|  |                            | 258952 | Olfr341  | 1.377262 |
|  |                            | 258354 | Olfr168  | 1.388465 |
|  |                            | 257978 | Olfr1322 | 1.404626 |
|  |                            | 258716 | Olfr424  | 1.435701 |
|  |                            | 258282 | Olfr801  | 1.467309 |
|  |                            | 258606 | Olfr229  | 1.518727 |
|  |                            | 258852 | Olfr1341 | 1.520375 |
|  |                            | 259124 | Olfr638  | 1.520383 |
|  |                            | 258739 | Olfr1362 | 1.612199 |
|  |                            | 258969 | Olfr1226 | 1.619691 |
|  |                            | 384732 | Gm10081  | 1.732919 |
|  |                            | 258319 | Olfr187  | 1.734293 |
|  |                            | 18347  | Olfr48   | 1.776151 |
|  |                            | 258638 | Olfr1163 | 1.786424 |
|  |                            | 258903 | Olfr1217 | 1.838686 |
|  |                            | 258959 | Olfr170  | 1.949262 |
|  |                            | 258285 | Olfr122  | 2.125295 |
|  |                            | 258928 | Olfr477  | 2.144292 |
|  |                            | 259025 | Olfr385  | 2.234689 |
|  |                            | 258859 | Olfr161  | 3.109598 |
|  |                            | 258762 | Olfr1109 | 3.197569 |
|  |                            | 19092  | Prkg2    | 3.495995 |
|  | GPCR downstream signalling | 258811 | Olfr926  | -4.64876 |
|  |                            | 23919  | InsI5    | -4.39738 |
|  |                            | 258358 | Olfr557  | -3.78887 |
|  |                            | 26361  | Avpr1b   | -2.92801 |
|  |                            | 258836 | Olfr272  | -2.73318 |
|  |                            | 258729 | Olfr478  | -2.64268 |
|  |                            | 258320 | Olfr1232 | -2.62691 |
|  |                            | 258371 | Olfr368  | -2.41772 |

|  |  |        |          |          |
|--|--|--------|----------|----------|
|  |  | 258775 | Olfr196  | -2.4027  |
|  |  | 14652  | Glp1r    | -2.36498 |
|  |  | 258177 | Olfr1222 | -2.34283 |
|  |  | 17202  | Mc4r     | -2.32772 |
|  |  | 19064  | Ppy      | -2.23412 |
|  |  | 217212 | Pyy      | -2.12279 |
|  |  | 387347 | Tas2r118 | -2.1135  |
|  |  | 404222 | Olfr231  | -2.03002 |
|  |  | 258982 | Olfr1272 | -2.01257 |
|  |  | 258674 | Olfr1427 | -1.9539  |
|  |  | 258315 | Olfr767  | -1.94937 |
|  |  | 259071 | Olfr166  | -1.91143 |
|  |  | 258025 | Olfr1211 | -1.8169  |
|  |  | 14459  | Gast     | -1.80179 |
|  |  | 257880 | Olfr1066 | -1.78941 |
|  |  | 574417 | Tas2r137 | -1.7196  |
|  |  | 258734 | Olfr502  | -1.70538 |
|  |  | 170639 | Olfr78   | -1.69158 |
|  |  | 258649 | Olfr441  | -1.68312 |
|  |  | 258880 | Olfr218  | -1.66686 |
|  |  | 667992 | Tas2r103 | -1.64983 |
|  |  | 258563 | Olfr1006 | -1.61089 |
|  |  | 17773  | Mtnr1a   | -1.58287 |
|  |  | 258559 | Olfr830  | -1.58115 |
|  |  | 258350 | Olfr706  | -1.56576 |
|  |  | 258939 | Olfr63   | -1.53883 |
|  |  | 258560 | Olfr843  | -1.51915 |
|  |  | 258744 | Olfr875  | -1.49692 |
|  |  | 18365  | Olfr65   | -1.48665 |
|  |  | 258465 | Olfr1387 | -1.39693 |
|  |  | 16867  | Lhcgr    | -1.37102 |
|  |  | 258932 | Olfr791  | -1.3421  |
|  |  | 268934 | Grm4     | -1.33684 |
|  |  | 258785 | Olfr1230 | -1.32246 |
|  |  | 259033 | Olfr1122 | -1.3054  |
|  |  | 18386  | Oprd1    | -1.27226 |
|  |  | 58991  | Ghrl     | -1.26899 |
|  |  | 15551  | Htr1b    | -1.2463  |
|  |  | 16952  | Anxa1    | -1.18898 |
|  |  | 18346  | Olfr47   | -1.18329 |
|  |  | 14309  | Fshr     | -1.17472 |



|  |  |        |             |          |
|--|--|--------|-------------|----------|
|  |  | 22068  | Trpc6       | -1.15821 |
|  |  | 258525 | Olfr1170    | -1.14879 |
|  |  | 259041 | Olfr1414    | -1.14487 |
|  |  | 15566  | Htr7        | -1.1364  |
|  |  | 258704 | Olfr411     | -1.13571 |
|  |  | 258417 | Olfr470     | -1.13038 |
|  |  | 21336  | Tacr1       | -1.12491 |
|  |  | 258180 | Olfr699     | -1.12295 |
|  |  | 258808 | Olfr620     | -1.1068  |
|  |  | 258281 | Olfr780     | -1.09618 |
|  |  | 14675  | Gna14       | -1.07872 |
|  |  | 18751  | Prkcb       | -1.07462 |
|  |  | 99296  | Hrh3        | -1.05305 |
|  |  | 242093 | Rxfp4       | -1.04311 |
|  |  | 15562  | Htr4        | -1.03209 |
|  |  | 18166  | Npy1r       | -1.02075 |
|  |  | 12772  | Ccr2        | -1.00727 |
|  |  | 12773  | Ccr4        | -1.00322 |
|  |  | 13614  | <i>Edn1</i> | -0.99296 |
|  |  | 19204  | Ptafr       | -0.97951 |
|  |  | 258151 | Olfr1505    | -0.97509 |
|  |  | 21333  | Tac1        | -0.97278 |
|  |  | 24012  | Rgs7        | -0.96881 |
|  |  | 258064 | Olfr316     | -0.95922 |
|  |  | 258991 | Olfr1496    | -0.94303 |
|  |  | 11555  | Adrb2       | -0.92768 |
|  |  | 18796  | Plcb2       | -0.92128 |
|  |  | 227289 | Gpbar1      | -0.88141 |
|  |  | 19227  | Pthlh       | -0.88025 |
|  |  | 12776  | Ccr8        | -0.85933 |
|  |  | 18583  | Pde7a       | -0.84692 |
|  |  | 11606  | Agt         | -0.80285 |
|  |  | 259113 | Olfr577     | -0.80041 |
|  |  | 217480 | Dgkb        | -0.80037 |
|  |  | 56470  | Rgs19       | -0.78909 |
|  |  | 11513  | Adcy7       | -0.76956 |
|  |  | 18829  | Ccl21a      | -0.76839 |
|  |  | 244701 | Mtnr1b      | -0.7353  |
|  |  | 22324  | Vav1        | -0.73052 |
|  |  | 258290 | Olfr1143    | -0.71076 |
|  |  | 73341  | Arhgef6     | -0.68006 |

|  |  |        |           |          |
|--|--|--------|-----------|----------|
|  |  | 319197 | Gpr4      | -0.63098 |
|  |  | 53978  | Lpar2     | -0.61346 |
|  |  | 14062  | F2r       | -0.61231 |
|  |  | 19219  | Ptger4    | -0.59249 |
|  |  | 18573  | Pde1a     | -0.58797 |
|  |  | 16801  | Arhgef1   | -0.58553 |
|  |  | 233571 | P2ry6     | -0.58524 |
|  |  | 69632  | Arhgef12  | 0.585643 |
|  |  | 258552 | Olfr868   | 0.63894  |
|  |  | 258463 | Olfr1393  | 0.6995   |
|  |  | 258652 | Olfr1131  | 0.710637 |
|  |  | 259119 | Olfr578   | 0.71483  |
|  |  | 258728 | Olfr482   | 0.7194   |
|  |  | 387343 | Tas2r109  | 0.735099 |
|  |  | 12921  | Crhr1     | 0.757531 |
|  |  | 18441  | P2ry1     | 0.758201 |
|  |  | 18322  | Olfr24    | 0.762628 |
|  |  | 320127 | Dgki      | 0.800134 |
|  |  | 110511 | Olfr153   | 0.805912 |
|  |  | 65086  | Lpar3     | 0.832089 |
|  |  | 12672  | Chrm4     | 0.850005 |
|  |  | 11517  | Adcyap1r1 | 0.851143 |
|  |  | 321020 | Fpr-rs6   | 0.856069 |
|  |  | 13491  | Drd4      | 0.875113 |
|  |  | 258487 | Olfr722   | 0.875545 |
|  |  | 259053 | Olfr362   | 0.886359 |
|  |  | 57271  | Olfr1509  | 0.887    |
|  |  | 258269 | Olfr930   | 0.892154 |
|  |  | 18331  | Olfr32    | 0.906447 |
|  |  | 14294  | Fpr3      | 0.944948 |
|  |  | 14676  | Gna15     | 0.956512 |
|  |  | 387356 | Tas2r131  | 0.958132 |
|  |  | 13492  | Drd5      | 0.966222 |
|  |  | 258518 | Olfr847   | 0.99196  |
|  |  | 259000 | Olfr195   | 1.024429 |
|  |  | 258492 | Olfr484   | 1.030595 |
|  |  | 258544 | Olfr788   | 1.082466 |
|  |  | 634104 | Olfr287   | 1.082896 |
|  |  | 258665 | Olfr815   | 1.09629  |
|  |  | 258507 | Olfr96    | 1.112944 |
|  |  | 258882 | Olfr874   | 1.141852 |

|  |                    |        |          |          |
|--|--------------------|--------|----------|----------|
|  |                    | 258984 | Olfr1257 | 1.187363 |
|  |                    | 15552  | Htr1d    | 1.221482 |
|  |                    | 257909 | Olfr735  | 1.237712 |
|  |                    | 12000  | Avpr2    | 1.251924 |
|  |                    | 117005 | Olfr74   | 1.29757  |
|  |                    | 258694 | Olfr1445 | 1.302618 |
|  |                    | 20300  | Ccl25    | 1.322852 |
|  |                    | 57385  | P2ry4    | 1.327103 |
|  |                    | 258661 | Olfr740  | 1.341121 |
|  |                    | 18167  | Npy2r    | 1.341246 |
|  |                    | 22044  | Trh      | 1.380194 |
|  |                    | 258354 | Olfr168  | 1.388465 |
|  |                    | 258716 | Olfr424  | 1.435701 |
|  |                    | 26946  | Trpc7    | 1.470884 |
|  |                    | 259124 | Olfr638  | 1.520383 |
|  |                    | 258969 | Olfr1226 | 1.619691 |
|  |                    | 384732 | Gm10081  | 1.732919 |
|  |                    | 258319 | Olfr187  | 1.734293 |
|  |                    | 258638 | Olfr1163 | 1.786424 |
|  |                    | 11541  | Adora2b  | 1.805445 |
|  |                    | 258903 | Olfr1217 | 1.838686 |
|  |                    | 258959 | Olfr170  | 1.949262 |
|  |                    | 116903 | Calcb    | 2.19162  |
|  |                    | 259025 | Olfr385  | 2.234689 |
|  |                    | 67405  | Nts      | 3.057371 |
|  |                    | 258859 | Olfr161  | 3.109598 |
|  | Signalling by GPCR | 258811 | Olfr926  | -4.64876 |
|  |                    | 23919  | Insl5    | -4.39738 |
|  |                    | 258358 | Olfr557  | -3.78887 |
|  |                    | 26361  | Avpr1b   | -2.92801 |
|  |                    | 258836 | Olfr272  | -2.73318 |
|  |                    | 258729 | Olfr478  | -2.64268 |
|  |                    | 258320 | Olfr1232 | -2.62691 |
|  |                    | 22413  | Wnt2     | -2.58182 |
|  |                    | 258371 | Olfr368  | -2.41772 |
|  |                    | 258775 | Olfr196  | -2.4027  |
|  |                    | 14652  | Glp1r    | -2.36498 |
|  |                    | 258177 | Olfr1222 | -2.34283 |
|  |                    | 17202  | Mc4r     | -2.32772 |
|  |                    | 19064  | Ppy      | -2.23412 |
|  |                    | 217212 | Pyy      | -2.12279 |

|  |  |        |          |          |
|--|--|--------|----------|----------|
|  |  | 387347 | Tas2r118 | -2.1135  |
|  |  | 404222 | Olfr231  | -2.03002 |
|  |  | 258982 | Olfr1272 | -2.01257 |
|  |  | 258674 | Olfr1427 | -1.9539  |
|  |  | 258315 | Olfr767  | -1.94937 |
|  |  | 259071 | Olfr166  | -1.91143 |
|  |  | 83770  | Tas1r2   | -1.84156 |
|  |  | 258025 | Olfr1211 | -1.8169  |
|  |  | 14459  | Gast     | -1.80179 |
|  |  | 257880 | Olfr1066 | -1.78941 |
|  |  | 574417 | Tas2r137 | -1.7196  |
|  |  | 258734 | Olfr502  | -1.70538 |
|  |  | 170639 | Olfr78   | -1.69158 |
|  |  | 258649 | Olfr441  | -1.68312 |
|  |  | 258880 | Olfr218  | -1.66686 |
|  |  | 667992 | Tas2r103 | -1.64983 |
|  |  | 258563 | Olfr1006 | -1.61089 |
|  |  | 17773  | Mtnr1a   | -1.58287 |
|  |  | 258559 | Olfr830  | -1.58115 |
|  |  | 258350 | Olfr706  | -1.56576 |
|  |  | 258939 | Olfr63   | -1.53883 |
|  |  | 258560 | Olfr843  | -1.51915 |
|  |  | 13137  | Daf2     | -1.49756 |
|  |  | 258744 | Olfr875  | -1.49692 |
|  |  | 18365  | Olfr65   | -1.48665 |
|  |  | 258465 | Olfr1387 | -1.39693 |
|  |  | 16867  | Lhcgr    | -1.37102 |
|  |  | 258932 | Olfr791  | -1.3421  |
|  |  | 268934 | Grm4     | -1.33684 |
|  |  | 258785 | Olfr1230 | -1.32246 |
|  |  | 259033 | Olfr1122 | -1.3054  |
|  |  | 13136  | Cd55     | -1.29775 |
|  |  | 18386  | Oprd1    | -1.27226 |
|  |  | 58991  | Ghrl     | -1.26899 |
|  |  | 15551  | Htr1b    | -1.2463  |
|  |  | 16952  | Anxa1    | -1.18898 |
|  |  | 18346  | Olfr47   | -1.18329 |
|  |  | 14309  | Fshr     | -1.17472 |
|  |  | 22068  | Trpc6    | -1.15821 |
|  |  | 258525 | Olfr1170 | -1.14879 |
|  |  | 259041 | Olfr1414 | -1.14487 |

|  |  |        |          |          |
|--|--|--------|----------|----------|
|  |  | 15566  | Htr7     | -1.1364  |
|  |  | 258704 | Olfr411  | -1.13571 |
|  |  | 258417 | Olfr470  | -1.13038 |
|  |  | 21336  | Tacr1    | -1.12491 |
|  |  | 258180 | Olfr699  | -1.12295 |
|  |  | 258808 | Olfr620  | -1.1068  |
|  |  | 258281 | Olfr780  | -1.09618 |
|  |  | 14675  | Gna14    | -1.07872 |
|  |  | 18751  | Prkcb    | -1.07462 |
|  |  | 99296  | Hrh3     | -1.05305 |
|  |  | 242093 | Rxfp4    | -1.04311 |
|  |  | 15562  | Htr4     | -1.03209 |
|  |  | 18166  | Npy1r    | -1.02075 |
|  |  | 12772  | Ccr2     | -1.00727 |
|  |  | 12773  | Ccr4     | -1.00322 |
|  |  | 13614  | Edn1     | -0.99296 |
|  |  | 19204  | Ptafr    | -0.97951 |
|  |  | 258151 | Olfr1505 | -0.97509 |
|  |  | 21333  | Tac1     | -0.97278 |
|  |  | 24012  | Rgs7     | -0.96881 |
|  |  | 12326  | Camk4    | -0.96196 |
|  |  | 258064 | Olfr316  | -0.95922 |
|  |  | 258991 | Olfr1496 | -0.94303 |
|  |  | 11555  | Adrb2    | -0.92768 |
|  |  | 18796  | Plcb2    | -0.92128 |
|  |  | 227289 | Gpbar1   | -0.88141 |
|  |  | 19227  | Pthlh    | -0.88025 |
|  |  | 12776  | Ccr8     | -0.85933 |
|  |  | 18583  | Pde7a    | -0.84692 |
|  |  | 11606  | Agt      | -0.80285 |
|  |  | 259113 | Olfr577  | -0.80041 |
|  |  | 217480 | Dgkb     | -0.80037 |
|  |  | 56470  | Rgs19    | -0.78909 |
|  |  | 11513  | Adcy7    | -0.76956 |
|  |  | 18829  | Ccl21a   | -0.76839 |
|  |  | 244701 | Mtnr1b   | -0.7353  |
|  |  | 22324  | Vav1     | -0.73052 |
|  |  | 14710  | Gngt2    | -0.72984 |
|  |  | 258290 | Olfr1143 | -0.71076 |
|  |  | 18749  | Prkacb   | -0.69222 |
|  |  | 73341  | Arhgef6  | -0.68006 |

|  |  |               |                  |                 |
|--|--|---------------|------------------|-----------------|
|  |  | 14784         | Grb2             | -0.6724         |
|  |  | 319197        | Gpr4             | -0.63098        |
|  |  | 53978         | Lpar2            | -0.61346        |
|  |  | 14062         | F2r              | -0.61231        |
|  |  | 26364         | Adgre5           | -0.60643        |
|  |  | 19219         | <i>Ptger4</i>    | -0.59249        |
|  |  | 18573         | Pde1a            | -0.58797        |
|  |  | 16801         | Arhgef1          | -0.58553        |
|  |  | 233571        | P2ry6            | -0.58524        |
|  |  | <b>69632</b>  | <b>Arhgef12</b>  | <b>0.585643</b> |
|  |  | <b>83771</b>  | <b>Tas1r3</b>    | <b>0.629121</b> |
|  |  | <b>14370</b>  | <b>Fzd8</b>      | <b>0.631495</b> |
|  |  | <b>258552</b> | <b>Olfr868</b>   | <b>0.63894</b>  |
|  |  | <b>258463</b> | <b>Olfr1393</b>  | <b>0.6995</b>   |
|  |  | <b>258652</b> | <b>Olfr1131</b>  | <b>0.710637</b> |
|  |  | <b>259119</b> | <b>Olfr578</b>   | <b>0.71483</b>  |
|  |  | <b>258728</b> | <b>Olfr482</b>   | <b>0.7194</b>   |
|  |  | <b>387343</b> | <b>Tas2r109</b>  | <b>0.735099</b> |
|  |  | <b>12921</b>  | <b>Crhr1</b>     | <b>0.757531</b> |
|  |  | <b>18441</b>  | <b>P2ry1</b>     | <b>0.758201</b> |
|  |  | <b>18322</b>  | <b>Olfr24</b>    | <b>0.762628</b> |
|  |  | <b>320127</b> | <b>Dgki</b>      | <b>0.800134</b> |
|  |  | <b>110511</b> | <b>Olfr153</b>   | <b>0.805912</b> |
|  |  | <b>65086</b>  | <b>Lpar3</b>     | <b>0.832089</b> |
|  |  | <b>12672</b>  | <b>Chrm4</b>     | <b>0.850005</b> |
|  |  | <b>11517</b>  | <b>Adcyap1r1</b> | <b>0.851143</b> |
|  |  | <b>321020</b> | <b>Fpr-rs6</b>   | <b>0.856069</b> |
|  |  | <b>13491</b>  | <b>Drd4</b>      | <b>0.875113</b> |
|  |  | <b>258487</b> | <b>Olfr722</b>   | <b>0.875545</b> |
|  |  | <b>259053</b> | <b>Olfr362</b>   | <b>0.886359</b> |
|  |  | <b>57271</b>  | <b>Olfr1509</b>  | <b>0.887</b>    |
|  |  | <b>258269</b> | <b>Olfr930</b>   | <b>0.892154</b> |
|  |  | <b>18331</b>  | <b>Olfr32</b>    | <b>0.906447</b> |
|  |  | <b>14294</b>  | <b>Fpr3</b>      | <b>0.944948</b> |
|  |  | <b>14676</b>  | <b>Gna15</b>     | <b>0.956512</b> |
|  |  | <b>387356</b> | <b>Tas2r131</b>  | <b>0.958132</b> |
|  |  | <b>13492</b>  | <b>Drd5</b>      | <b>0.966222</b> |
|  |  | <b>258518</b> | <b>Olfr847</b>   | <b>0.99196</b>  |
|  |  | <b>259000</b> | <b>Olfr195</b>   | <b>1.024429</b> |
|  |  | <b>258492</b> | <b>Olfr484</b>   | <b>1.030595</b> |
|  |  | <b>258544</b> | <b>Olfr788</b>   | <b>1.082466</b> |

|  |                      |        |          |          |
|--|----------------------|--------|----------|----------|
|  |                      | 634104 | Olfr287  | 1.082896 |
|  |                      | 258665 | Olfr815  | 1.09629  |
|  |                      | 258507 | Olfr96   | 1.112944 |
|  |                      | 258882 | Olfr874  | 1.141852 |
|  |                      | 258984 | Olfr1257 | 1.187363 |
|  |                      | 15552  | Htr1d    | 1.221482 |
|  |                      | 257909 | Olfr735  | 1.237712 |
|  |                      | 12000  | Avpr2    | 1.251924 |
|  |                      | 117005 | Olfr74   | 1.29757  |
|  |                      | 258694 | Olfr1445 | 1.302618 |
|  |                      | 20300  | Ccl25    | 1.322852 |
|  |                      | 57385  | P2ry4    | 1.327103 |
|  |                      | 258661 | Olfr740  | 1.341121 |
|  |                      | 18167  | Npy2r    | 1.341246 |
|  |                      | 22044  | Trh      | 1.380194 |
|  |                      | 258354 | Olfr168  | 1.388465 |
|  |                      | 258716 | Olfr424  | 1.435701 |
|  |                      | 252837 | Ackr4    | 1.449683 |
|  |                      | 26946  | Trpc7    | 1.470884 |
|  |                      | 259124 | Olfr638  | 1.520383 |
|  |                      | 258969 | Olfr1226 | 1.619691 |
|  |                      | 384732 | Gm10081  | 1.732919 |
|  |                      | 258319 | Olfr187  | 1.734293 |
|  |                      | 258638 | Olfr1163 | 1.786424 |
|  |                      | 11541  | Adora2b  | 1.805445 |
|  |                      | 258903 | Olfr1217 | 1.838686 |
|  |                      | 258959 | Olfr170  | 1.949262 |
|  |                      | 116903 | Calcb    | 2.19162  |
|  |                      | 259025 | Olfr385  | 2.234689 |
|  |                      | 67405  | Nts      | 3.057371 |
|  |                      | 258859 | Olfr161  | 3.109598 |
|  | Olfactory signalling | 258811 | Olfr926  | -4.64876 |
|  | Olfactory Pathway    | 258358 | Olfr557  | -3.78887 |
|  |                      | 258836 | Olfr272  | -2.73318 |
|  |                      | 258729 | Olfr478  | -2.64268 |
|  |                      | 258320 | Olfr1232 | -2.62691 |
|  |                      | 258371 | Olfr368  | -2.41772 |
|  |                      | 258775 | Olfr196  | -2.4027  |
|  |                      | 258177 | Olfr1222 | -2.34283 |
|  |                      | 404222 | Olfr231  | -2.03002 |
|  |                      | 258982 | Olfr1272 | -2.01257 |

|  |  |               |                 |                 |
|--|--|---------------|-----------------|-----------------|
|  |  | 258674        | Olfr1427        | -1.9539         |
|  |  | 258315        | Olfr767         | -1.94937        |
|  |  | 259071        | Olfr166         | -1.91143        |
|  |  | 258025        | Olfr1211        | -1.8169         |
|  |  | 257880        | Olfr1066        | -1.78941        |
|  |  | 258734        | Olfr502         | -1.70538        |
|  |  | 170639        | Olfr78          | -1.69158        |
|  |  | 258649        | Olfr441         | -1.68312        |
|  |  | 258880        | Olfr218         | -1.66686        |
|  |  | 258563        | Olfr1006        | -1.61089        |
|  |  | 258559        | Olfr830         | -1.58115        |
|  |  | 258350        | Olfr706         | -1.56576        |
|  |  | 258939        | Olfr63          | -1.53883        |
|  |  | 258560        | Olfr843         | -1.51915        |
|  |  | 258744        | Olfr875         | -1.49692        |
|  |  | 18365         | Olfr65          | -1.48665        |
|  |  | 258465        | Olfr1387        | -1.39693        |
|  |  | 258932        | Olfr791         | -1.3421         |
|  |  | 258785        | Olfr1230        | -1.32246        |
|  |  | 259033        | Olfr1122        | -1.3054         |
|  |  | 18346         | Olfr47          | -1.18329        |
|  |  | 258525        | Olfr1170        | -1.14879        |
|  |  | 259041        | Olfr1414        | -1.14487        |
|  |  | 258704        | Olfr411         | -1.13571        |
|  |  | 258417        | Olfr470         | -1.13038        |
|  |  | 258180        | Olfr699         | -1.12295        |
|  |  | 258808        | Olfr620         | -1.1068         |
|  |  | 258281        | Olfr780         | -1.09618        |
|  |  | 258151        | Olfr1505        | -0.97509        |
|  |  | 258064        | Olfr316         | -0.95922        |
|  |  | 258991        | Olfr1496        | -0.94303        |
|  |  | 259113        | Olfr577         | -0.80041        |
|  |  | 258290        | Olfr1143        | -0.71076        |
|  |  | <b>258552</b> | <b>Olfr868</b>  | <b>0.63894</b>  |
|  |  | <b>258463</b> | <b>Olfr1393</b> | <b>0.6995</b>   |
|  |  | <b>258652</b> | <b>Olfr1131</b> | <b>0.710637</b> |
|  |  | <b>259119</b> | <b>Olfr578</b>  | <b>0.71483</b>  |
|  |  | <b>258728</b> | <b>Olfr482</b>  | <b>0.7194</b>   |
|  |  | <b>18322</b>  | <b>Olfr24</b>   | <b>0.762628</b> |
|  |  | <b>110511</b> | <b>Olfr153</b>  | <b>0.805912</b> |
|  |  | <b>258487</b> | <b>Olfr722</b>  | <b>0.875545</b> |



|  |                     |        |          |          |
|--|---------------------|--------|----------|----------|
|  |                     | 259053 | Olfr362  | 0.886359 |
|  |                     | 57271  | Olfr1509 | 0.887    |
|  |                     | 258269 | Olfr930  | 0.892154 |
|  |                     | 18331  | Olfr32   | 0.906447 |
|  |                     | 258518 | Olfr847  | 0.99196  |
|  |                     | 259000 | Olfr195  | 1.024429 |
|  |                     | 258492 | Olfr484  | 1.030595 |
|  |                     | 258544 | Olfr788  | 1.082466 |
|  |                     | 634104 | Olfr287  | 1.082896 |
|  |                     | 258665 | Olfr815  | 1.09629  |
|  |                     | 258507 | Olfr96   | 1.112944 |
|  |                     | 258882 | Olfr874  | 1.141852 |
|  |                     | 258984 | Olfr1257 | 1.187363 |
|  |                     | 257909 | Olfr735  | 1.237712 |
|  |                     | 117005 | Olfr74   | 1.29757  |
|  |                     | 258694 | Olfr1445 | 1.302618 |
|  |                     | 258661 | Olfr740  | 1.341121 |
|  |                     | 258354 | Olfr168  | 1.388465 |
|  |                     | 258716 | Olfr424  | 1.435701 |
|  |                     | 259124 | Olfr638  | 1.520383 |
|  |                     | 258969 | Olfr1226 | 1.619691 |
|  |                     | 384732 | Gm10081  | 1.732919 |
|  |                     | 258319 | Olfr187  | 1.734293 |
|  |                     | 258638 | Olfr1163 | 1.786424 |
|  |                     | 258903 | Olfr1217 | 1.838686 |
|  |                     | 258959 | Olfr170  | 1.949262 |
|  |                     | 259025 | Olfr385  | 2.234689 |
|  |                     | 258859 | Olfr161  | 3.109598 |
|  | Signal Transduction | 258811 | Olfr926  | -4.64876 |
|  |                     | 23919  | InsI5    | -4.39738 |
|  |                     | 258358 | Olfr557  | -3.78887 |
|  |                     | 21828  | Thbs4    | -3.44354 |
|  |                     | 13386  | Dlk1     | -3.27428 |
|  |                     | 26361  | Avpr1b   | -2.92801 |
|  |                     | 258836 | Olfr272  | -2.73318 |
|  |                     | 258729 | Olfr478  | -2.64268 |
|  |                     | 258320 | Olfr1232 | -2.62691 |
|  |                     | 22413  | Wnt2     | -2.58182 |
|  |                     | 258371 | Olfr368  | -2.41772 |
|  |                     | 258775 | Olfr196  | -2.4027  |
|  |                     | 14652  | Glp1r    | -2.36498 |

|  |  |        |          |          |
|--|--|--------|----------|----------|
|  |  | 258177 | Olfr1222 | -2.34283 |
|  |  | 17202  | Mc4r     | -2.32772 |
|  |  | 22139  | Ttr      | -2.27389 |
|  |  | 19064  | Ppy      | -2.23412 |
|  |  | 242341 | Atp6v0d2 | -2.21608 |
|  |  | 217212 | Pyy      | -2.12279 |
|  |  | 387347 | Tas2r118 | -2.1135  |
|  |  | 338375 | Atp6v1g3 | -2.04699 |
|  |  | 404222 | Olfr231  | -2.03002 |
|  |  | 258982 | Olfr1272 | -2.01257 |
|  |  | 245650 | Gucy2f   | -1.96801 |
|  |  | 258674 | Olfr1427 | -1.9539  |
|  |  | 258315 | Olfr767  | -1.94937 |
|  |  | 259071 | Olfr166  | -1.91143 |
|  |  | 83770  | Tas1r2   | -1.84156 |
|  |  | 258025 | Olfr1211 | -1.8169  |
|  |  | 14459  | Gast     | -1.80179 |
|  |  | 257880 | Olfr1066 | -1.78941 |
|  |  | 17228  | Cma1     | -1.73523 |
|  |  | 83379  | Klb      | -1.72259 |
|  |  | 574417 | Tas2r137 | -1.7196  |
|  |  | 258734 | Olfr502  | -1.70538 |
|  |  | 170639 | Olfr78   | -1.69158 |
|  |  | 258649 | Olfr441  | -1.68312 |
|  |  | 258880 | Olfr218  | -1.66686 |
|  |  | 14725  | Lrp2     | -1.65004 |
|  |  | 667992 | Tas2r103 | -1.64983 |
|  |  | 16323  | Inhba    | -1.62741 |
|  |  | 258563 | Olfr1006 | -1.61089 |
|  |  | 17773  | Mtnr1a   | -1.58287 |
|  |  | 258559 | Olfr830  | -1.58115 |
|  |  | 258350 | Olfr706  | -1.56576 |
|  |  | 258939 | Olfr63   | -1.53883 |
|  |  | 76117  | Arhgap15 | -1.53779 |
|  |  | 258560 | Olfr843  | -1.51915 |
|  |  | 13137  | Daf2     | -1.49756 |
|  |  | 258744 | Olfr875  | -1.49692 |
|  |  | 18365  | Olfr65   | -1.48665 |
|  |  | 54613  | St3gal6  | -1.44575 |
|  |  | 232201 | Arhgap25 | -1.4054  |
|  |  | 14357  | Dtx1     | -1.40444 |

|  |  |        |             |          |
|--|--|--------|-------------|----------|
|  |  | 258465 | Olfr1387    | -1.39693 |
|  |  | 16867  | Lhcgr       | -1.37102 |
|  |  | 258932 | Olfr791     | -1.3421  |
|  |  | 268934 | Grm4        | -1.33684 |
|  |  | 258785 | Olfr1230    | -1.32246 |
|  |  | 259033 | Olfr1122    | -1.3054  |
|  |  | 13136  | Cd55        | -1.29775 |
|  |  | 18386  | Oprd1       | -1.27226 |
|  |  | 58991  | Ghrl        | -1.26899 |
|  |  | 15551  | Htr1b       | -1.2463  |
|  |  | 16952  | Anxa1       | -1.18898 |
|  |  | 18346  | Olfr47      | -1.18329 |
|  |  | 14309  | Fshr        | -1.17472 |
|  |  | 14268  | Fn1         | -1.16448 |
|  |  | 22068  | Trpc6       | -1.15821 |
|  |  | 258525 | Olfr1170    | -1.14879 |
|  |  | 259041 | Olfr1414    | -1.14487 |
|  |  | 15566  | Htr7        | -1.1364  |
|  |  | 258704 | Olfr411     | -1.13571 |
|  |  | 258417 | Olfr470     | -1.13038 |
|  |  | 21336  | Tacr1       | -1.12491 |
|  |  | 258180 | Olfr699     | -1.12295 |
|  |  | 258808 | Olfr620     | -1.1068  |
|  |  | 258281 | Olfr780     | -1.09618 |
|  |  | 14675  | Gna14       | -1.07872 |
|  |  | 18751  | Prkcb       | -1.07462 |
|  |  | 99296  | Hrh3        | -1.05305 |
|  |  | 242093 | Rxfp4       | -1.04311 |
|  |  | 22341  | Vegfc       | -1.03365 |
|  |  | 15562  | Htr4        | -1.03209 |
|  |  | 18166  | Npy1r       | -1.02075 |
|  |  | 12772  | Ccr2        | -1.00727 |
|  |  | 18815  | Plg         | -1.00547 |
|  |  | 12773  | Ccr4        | -1.00322 |
|  |  | 13614  | <i>Edn1</i> | -0.99296 |
|  |  | 19204  | Ptafr       | -0.97951 |
|  |  | 258151 | Olfr1505    | -0.97509 |
|  |  | 21333  | Tac1        | -0.97278 |
|  |  | 11857  | Arhgdib     | -0.969   |
|  |  | 24012  | Rgs7        | -0.96881 |
|  |  | 12326  | Camk4       | -0.96196 |

|  |  |        |          |          |
|--|--|--------|----------|----------|
|  |  | 258064 | Olfr316  | -0.95922 |
|  |  | 258991 | Olfr1496 | -0.94303 |
|  |  | 11555  | Adrb2    | -0.92768 |
|  |  | 14735  | Gpc4     | -0.92575 |
|  |  | 18796  | Plcb2    | -0.92128 |
|  |  | 80837  | Rhoj     | -0.9051  |
|  |  | 15205  | Hes1     | -0.88304 |
|  |  | 227289 | Gpbar1   | -0.88141 |
|  |  | 19227  | Pthlh    | -0.88025 |
|  |  | 94212  | Pag1     | -0.86399 |
|  |  | 12776  | Ccr8     | -0.85933 |
|  |  | 107477 | Guca1b   | -0.85852 |
|  |  | 72536  | Tagap    | -0.85136 |
|  |  | 12487  | Cd28     | -0.85003 |
|  |  | 18583  | Pde7a    | -0.84692 |
|  |  | 18776  | Prl3b1   | -0.8162  |
|  |  | 11606  | Agt      | -0.80285 |
|  |  | 259113 | Olfr577  | -0.80041 |
|  |  | 217480 | Dgkb     | -0.80037 |
|  |  | 56470  | Rgs19    | -0.78909 |
|  |  | 11513  | Adcy7    | -0.76956 |
|  |  | 18829  | Ccl21a   | -0.76839 |
|  |  | 20441  | St3gal3  | -0.74711 |
|  |  | 17136  | Mag      | -0.74259 |
|  |  | 18775  | Prl3d1   | -0.74072 |
|  |  | 244701 | Mtnr1b   | -0.7353  |
|  |  | 22324  | Vav1     | -0.73052 |
|  |  | 14710  | Gngt2    | -0.72984 |
|  |  | 14257  | Flt4     | -0.71094 |
|  |  | 258290 | Olfr1143 | -0.71076 |
|  |  | 18749  | Prkacb   | -0.69222 |
|  |  | 58194  | Sh3kbp1  | -0.68653 |
|  |  | 73341  | Arhgef6  | -0.68006 |
|  |  | 14784  | Grb2     | -0.6724  |
|  |  | 17242  | Mdk      | -0.6707  |
|  |  | 17921  | Myo7a    | -0.64451 |
|  |  | 319197 | Gpr4     | -0.63098 |
|  |  | 83554  | Fstl3    | -0.6248  |
|  |  | 53978  | Lpar2    | -0.61346 |
|  |  | 14062  | F2r      | -0.61231 |
|  |  | 21894  | Tln1     | -0.60783 |

|  |  |        |           |          |
|--|--|--------|-----------|----------|
|  |  | 26364  | Adgre5    | -0.60643 |
|  |  | 54601  | Foxo4     | -0.60052 |
|  |  | 16367  | Irs1      | -0.59977 |
|  |  | 19219  | Ptger4    | -0.59249 |
|  |  | 18573  | Pde1a     | -0.58797 |
|  |  | 16801  | Arhgef1   | -0.58553 |
|  |  | 233571 | P2ry6     | -0.58524 |
|  |  | 69632  | Arhgef12  | 0.585643 |
|  |  | 17311  | Kitl      | 0.607134 |
|  |  | 20602  | Ncor2     | 0.620732 |
|  |  | 83771  | Tas1r3    | 0.629121 |
|  |  | 14370  | Fzd8      | 0.631495 |
|  |  | 16971  | Lrp1      | 0.638471 |
|  |  | 258552 | Olfr868   | 0.63894  |
|  |  | 258463 | Olfr1393  | 0.6995   |
|  |  | 258652 | Olfr1131  | 0.710637 |
|  |  | 259119 | Olfr578   | 0.71483  |
|  |  | 258728 | Olfr482   | 0.7194   |
|  |  | 387343 | Tas2r109  | 0.735099 |
|  |  | 230597 | Zfyve9    | 0.74451  |
|  |  | 12921  | Crhr1     | 0.757531 |
|  |  | 18441  | P2ry1     | 0.758201 |
|  |  | 18322  | Olfr24    | 0.762628 |
|  |  | 19111  | Prl6a1    | 0.770609 |
|  |  | 320127 | Dgki      | 0.800134 |
|  |  | 110511 | Olfr153   | 0.805912 |
|  |  | 65086  | Lpar3     | 0.832089 |
|  |  | 259302 | Srgap3    | 0.835414 |
|  |  | 12672  | Chrm4     | 0.850005 |
|  |  | 11517  | Adcyap1r1 | 0.851143 |
|  |  | 108099 | Prkag2    | 0.85238  |
|  |  | 321020 | Fpr-rs6   | 0.856069 |
|  |  | 13491  | Drd4      | 0.875113 |
|  |  | 258487 | Olfr722   | 0.875545 |
|  |  | 259053 | Olfr362   | 0.886359 |
|  |  | 57271  | Olfr1509  | 0.887    |
|  |  | 258269 | Olfr930   | 0.892154 |
|  |  | 20404  | Sh3gl2    | 0.903947 |
|  |  | 18331  | Olfr32    | 0.906447 |
|  |  | 14294  | Fpr3      | 0.944948 |
|  |  | 56484  | Foxo3     | 0.947986 |

|  |  |        |          |          |
|--|--|--------|----------|----------|
|  |  | 14676  | Gna15    | 0.956512 |
|  |  | 387356 | Tas2r131 | 0.958132 |
|  |  | 13492  | Drd5     | 0.966222 |
|  |  | 19273  | Ptpru    | 0.976005 |
|  |  | 74915  | Atp6v1e2 | 0.979016 |
|  |  | 258518 | Olfr847  | 0.99196  |
|  |  | 259000 | Olfr195  | 1.024429 |
|  |  | 258492 | Olfr484  | 1.030595 |
|  |  | 14599  | Gh       | 1.043182 |
|  |  | 69993  | Chn2     | 1.070246 |
|  |  | 258544 | Olfr788  | 1.082466 |
|  |  | 634104 | Olfr287  | 1.082896 |
|  |  | 258665 | Olfr815  | 1.09629  |
|  |  | 22414  | Wnt2b    | 1.109751 |
|  |  | 258507 | Olfr96   | 1.112944 |
|  |  | 258882 | Olfr874  | 1.141852 |
|  |  | 258984 | Olfr1257 | 1.187363 |
|  |  | 15552  | Htr1d    | 1.221482 |
|  |  | 257909 | Olfr735  | 1.237712 |
|  |  | 12000  | Avpr2    | 1.251924 |
|  |  | 545481 | Arhgap40 | 1.285542 |
|  |  | 117005 | Olfr74   | 1.29757  |
|  |  | 258694 | Olfr1445 | 1.302618 |
|  |  | 20300  | Ccl25    | 1.322852 |
|  |  | 57385  | P2ry4    | 1.327103 |
|  |  | 258661 | Olfr740  | 1.341121 |
|  |  | 18167  | Npy2r    | 1.341246 |
|  |  | 22044  | Trh      | 1.380194 |
|  |  | 258354 | Olfr168  | 1.388465 |
|  |  | 258716 | Olfr424  | 1.435701 |
|  |  | 19116  | Prlr     | 1.437521 |
|  |  | 252837 | Ackr4    | 1.449683 |
|  |  | 26946  | Trpc7    | 1.470884 |
|  |  | 259124 | Olfr638  | 1.520383 |
|  |  | 258969 | Olfr1226 | 1.619691 |
|  |  | 384732 | Gm10081  | 1.732919 |
|  |  | 258319 | Olfr187  | 1.734293 |
|  |  | 258638 | Olfr1163 | 1.786424 |
|  |  | 11541  | Adora2b  | 1.805445 |
|  |  | 258903 | Olfr1217 | 1.838686 |
|  |  | 258959 | Olfr170  | 1.949262 |

|  |               |                 |                 |                 |
|--|---------------|-----------------|-----------------|-----------------|
|  |               | <b>105349</b>   | <b>Akr1c18</b>  | <b>1.966455</b> |
|  |               | <b>244867</b>   | <b>Arhgap20</b> | <b>1.969602</b> |
|  |               | <b>116903</b>   | <b>Calcb</b>    | <b>2.19162</b>  |
|  |               | <b>259025</b>   | <b>Olfr385</b>  | <b>2.234689</b> |
|  |               | <b>67405</b>    | <b>Nts</b>      | <b>3.057371</b> |
|  |               | <b>258859</b>   | <b>Olfr161</b>  | <b>3.109598</b> |
|  |               | <b>238055</b>   | <b>Apob</b>     | <b>3.336986</b> |
|  | Odorant GPCRs | 14608           | Gpr83           | -3.21469        |
|  |               | 77596           | Adgrf1          | -2.76988        |
|  |               | 258729          | Olfr478         | -2.64268        |
|  |               | 64378           | Gpr88           | -2.30643        |
|  |               | 381413          | Gpr176          | -2.13457        |
|  |               | 83924           | Gpr137b         | -2.12778        |
|  |               | 209513          | Taar4           | -1.97343        |
|  |               | 113847          | Vmn1r43         | -1.9454         |
|  |               | 113846          | Vmn1r47         | -1.92418        |
|  |               | 83770           | Tas1r2          | -1.84156        |
|  |               | 664862          | Gpr137b-ps      | -1.82967        |
|  |               | 258734          | Olfr502         | -1.70538        |
|  |               | 258939          | Olfr63          | -1.53883        |
|  |               | 209517          | Taar7b          | -1.36067        |
|  |               | 329252          | Lgr6            | -1.35867        |
|  |               | 113848          | Vmn1r42         | -1.29014        |
|  |               | 229357          | Gpr149          | -1.26846        |
|  |               | 258417          | Olfr470         | -1.13038        |
|  |               | 435207          | Taar7f          | -0.98449        |
|  |               | 70693           | Adgra2          | -0.92974        |
|  |               | 239530          | Gpr20           | -0.90468        |
|  |               | 64450           | Gpr85           | -0.85607        |
|  |               | 319197          | Gpr4            | -0.63098        |
|  |               | 224792          | Adgrf5          | -0.62424        |
|  |               | <b>83771</b>    | <b>Tas1r3</b>   | <b>0.629121</b> |
|  |               | <b>269053</b>   | <b>Gpr152</b>   | <b>0.701654</b> |
|  |               | <b>258728</b>   | <b>Olfr482</b>  | <b>0.7194</b>   |
|  |               | <b>387343</b>   | <b>Tas2r109</b> | <b>0.735099</b> |
|  |               | <b>18322</b>    | <b>Olfr24</b>   | <b>0.762628</b> |
|  |               | <b>52710</b>    | <b>Slc52a2</b>  | <b>0.805314</b> |
|  |               | <b>76206</b>    | <b>Gpr165</b>   | <b>0.849664</b> |
|  |               | <b>107515</b>   | <b>Lgr4</b>     | <b>0.851757</b> |
|  | <b>233230</b> | <b>Mrgprb4</b>  | <b>0.92276</b>  |                 |
|  | <b>257959</b> | <b>Olfr1537</b> | <b>0.981626</b> |                 |

|  |                     |               |                |                 |
|--|---------------------|---------------|----------------|-----------------|
|  |                     | <b>233670</b> | <b>Olfr6</b>   | <b>1.010129</b> |
|  |                     | <b>258492</b> | <b>Olfr484</b> | <b>1.030595</b> |
|  |                     | <b>215854</b> | <b>Taar5</b>   | <b>1.272795</b> |
|  |                     | <b>257890</b> | <b>Olfr12</b>  | <b>1.339785</b> |
|  |                     | <b>14761</b>  | <b>Gpr27</b>   | <b>1.471809</b> |
|  |                     | <b>113850</b> | <b>V1ra8</b>   | <b>1.713639</b> |
|  |                     | <b>258319</b> | <b>Olfr187</b> | <b>1.734293</b> |
|  |                     | <b>171469</b> | <b>Gpr37l1</b> | <b>1.787234</b> |
|  |                     | <b>258928</b> | <b>Olfr477</b> | <b>2.144292</b> |
|  | GPCR ligand binding | 23919         | Insl5          | -4.39738        |
|  |                     | 26361         | Avpr1b         | -2.92801        |
|  |                     | 22413         | Wnt2           | -2.58182        |
|  |                     | 14652         | Glp1r          | -2.36498        |
|  |                     | 17202         | Mc4r           | -2.32772        |
|  |                     | 19064         | Ppy            | -2.23412        |
|  |                     | 217212        | Pyy            | -2.12279        |
|  |                     | 387347        | Tas2r118       | -2.1135         |
|  |                     | 83770         | Tas1r2         | -1.84156        |
|  |                     | 574417        | Tas2r137       | -1.7196         |
|  |                     | 667992        | Tas2r103       | -1.64983        |
|  |                     | 17773         | Mtnr1a         | -1.58287        |
|  |                     | 13137         | Daf2           | -1.49756        |
|  |                     | 16867         | Lhcgr          | -1.37102        |
|  |                     | 268934        | Grm4           | -1.33684        |
|  |                     | 13136         | Cd55           | -1.29775        |
|  |                     | 18386         | Oprd1          | -1.27226        |
|  |                     | 58991         | Ghrl           | -1.26899        |
|  |                     | 15551         | Htr1b          | -1.2463         |
|  |                     | 16952         | Anxa1          | -1.18898        |
|  |                     | 14309         | Fshr           | -1.17472        |
|  |                     | 15566         | Htr7           | -1.1364         |
|  |                     | 21336         | Tacr1          | -1.12491        |
|  |                     | 99296         | Hrh3           | -1.05305        |
|  |                     | 242093        | Rxfp4          | -1.04311        |
|  |                     | 15562         | Htr4           | -1.03209        |
|  |                     | 18166         | Npy1r          | -1.02075        |
|  |                     | 12773         | Ccr4           | -1.00322        |
|  |                     | 13614         | Edn1           | -0.99296        |
|  |                     | 19204         | Ptafr          | -0.97951        |
|  |                     | 21333         | Tac1           | -0.97278        |
|  |                     | 11555         | Adrb2          | -0.92768        |



|  |                               |               |                  |                 |
|--|-------------------------------|---------------|------------------|-----------------|
|  |                               | 227289        | Gpbar1           | -0.88141        |
|  |                               | 19227         | Pthlh            | -0.88025        |
|  |                               | 11606         | Agt              | -0.80285        |
|  |                               | 18829         | Ccl21a           | -0.76839        |
|  |                               | 244701        | Mtnr1b           | -0.7353         |
|  |                               | 14710         | Gngt2            | -0.72984        |
|  |                               | 319197        | Gpr4             | -0.63098        |
|  |                               | 53978         | Lpar2            | -0.61346        |
|  |                               | 14062         | F2r              | -0.61231        |
|  |                               | 26364         | Adgre5           | -0.60643        |
|  |                               | 19219         | Ptger4           | -0.59249        |
|  |                               | 233571        | P2ry6            | -0.58524        |
|  |                               | <b>83771</b>  | <b>Tas1r3</b>    | <b>0.629121</b> |
|  |                               | <b>14370</b>  | <b>Fzd8</b>      | <b>0.631495</b> |
|  |                               | <b>387343</b> | <b>Tas2r109</b>  | <b>0.735099</b> |
|  |                               | <b>12921</b>  | <b>Crhr1</b>     | <b>0.757531</b> |
|  |                               | <b>18441</b>  | <b>P2ry1</b>     | <b>0.758201</b> |
|  |                               | <b>65086</b>  | <b>Lpar3</b>     | <b>0.832089</b> |
|  |                               | <b>12672</b>  | <b>Chrm4</b>     | <b>0.850005</b> |
|  |                               | <b>11517</b>  | <b>Adcyap1r1</b> | <b>0.851143</b> |
|  |                               | <b>321020</b> | <b>Fpr-rs6</b>   | <b>0.856069</b> |
|  |                               | <b>13491</b>  | <b>Drd4</b>      | <b>0.875113</b> |
|  |                               | <b>14294</b>  | <b>Fpr3</b>      | <b>0.944948</b> |
|  |                               | <b>387356</b> | <b>Tas2r131</b>  | <b>0.958132</b> |
|  |                               | <b>13492</b>  | <b>Drd5</b>      | <b>0.966222</b> |
|  |                               | <b>15552</b>  | <b>Htr1d</b>     | <b>1.221482</b> |
|  |                               | <b>12000</b>  | <b>Avpr2</b>     | <b>1.251924</b> |
|  |                               | <b>20300</b>  | <b>Ccl25</b>     | <b>1.322852</b> |
|  |                               | <b>57385</b>  | <b>P2ry4</b>     | <b>1.327103</b> |
|  |                               | <b>18167</b>  | <b>Npy2r</b>     | <b>1.341246</b> |
|  |                               | <b>22044</b>  | <b>Trh</b>       | <b>1.380194</b> |
|  |                               | <b>252837</b> | <b>Ackr4</b>     | <b>1.449683</b> |
|  |                               | <b>11541</b>  | <b>Adora2b</b>   | <b>1.805445</b> |
|  |                               | <b>116903</b> | <b>Calcb</b>     | <b>2.19162</b>  |
|  |                               | <b>67405</b>  | <b>Nts</b>       | <b>3.057371</b> |
|  | GPCRs, Class A Rhodopsin-like | 258811        | Olfr926          | -4.64876        |
|  |                               | 14608         | Gpr83            | -3.21469        |
|  |                               | 26361         | Avpr1b           | -2.92801        |
|  |                               | 257912        | Olfr948          | -2.16021        |
|  |                               | 17773         | Mtnr1a           | -1.58287        |
|  |                               | 258350        | Olfr706          | -1.56576        |

|  |              |               |                  |                 |
|--|--------------|---------------|------------------|-----------------|
|  |              | 16867         | Lhcgr            | -1.37102        |
|  |              | 258173        | Olfr1532-<br>ps1 | -1.3396         |
|  |              | 57811         | Rgr              | -1.28031        |
|  |              | 18386         | Oprd1            | -1.27226        |
|  |              | 15551         | Htr1b            | -1.2463         |
|  |              | 14309         | Fshr             | -1.17472        |
|  |              | 15566         | Htr7             | -1.1364         |
|  |              | 15562         | Htr4             | -1.03209        |
|  |              | 18166         | Npy1r            | -1.02075        |
|  |              | 12772         | Ccr2             | -1.00727        |
|  |              | 12773         | Ccr4             | -1.00322        |
|  |              | 19204         | Ptafr            | -0.97951        |
|  |              | 11555         | Adrb2            | -0.92768        |
|  |              | 12776         | Ccr8             | -0.85933        |
|  |              | 14062         | F2r              | -0.61231        |
|  |              | 19219         | <i>Ptger4</i>    | -0.59249        |
|  |              | 233571        | P2ry6            | -0.58524        |
|  |              | <b>18441</b>  | <b>P2ry1</b>     | <b>0.758201</b> |
|  |              | <b>12672</b>  | <b>Chrm4</b>     | <b>0.850005</b> |
|  |              | <b>13491</b>  | <b>Drd4</b>      | <b>0.875113</b> |
|  |              | <b>258269</b> | <b>Olfr930</b>   | <b>0.892154</b> |
|  |              | <b>258499</b> | <b>Olfr945</b>   | <b>0.933335</b> |
|  |              | <b>14294</b>  | <b>Fpr3</b>      | <b>0.944948</b> |
|  |              | <b>257959</b> | <b>Olfr1537</b>  | <b>0.981626</b> |
|  |              | <b>233670</b> | <b>Olfr6</b>     | <b>1.010129</b> |
|  |              | <b>14765</b>  | <b>Gpr50</b>     | <b>1.018872</b> |
|  |              | <b>258882</b> | <b>Olfr874</b>   | <b>1.141852</b> |
|  |              | <b>15552</b>  | <b>Htr1d</b>     | <b>1.221482</b> |
|  |              | <b>12000</b>  | <b>Avpr2</b>     | <b>1.251924</b> |
|  |              | <b>57385</b>  | <b>P2ry4</b>     | <b>1.327103</b> |
|  |              | <b>258046</b> | <b>Olfr951</b>   | <b>1.336804</b> |
|  |              | <b>18167</b>  | <b>Npy2r</b>     | <b>1.341246</b> |
|  |              | <b>14761</b>  | <b>Gpr27</b>     | <b>1.471809</b> |
|  |              | <b>171469</b> | <b>Gpr3711</b>   | <b>1.787234</b> |
|  |              | <b>11541</b>  | <b>Adora2b</b>   | <b>1.805445</b> |
|  |              | <b>11551</b>  | <b>Adra2a</b>    | <b>2.836444</b> |
|  | GPCRs, Other | 14608         | Gpr83            | -3.21469        |
|  |              | 17202         | Mc4r             | -2.32772        |
|  |              | 64378         | Gpr88            | -2.30643        |
|  |              | 113847        | Vmn1r43          | -1.9454         |
|  |              | 113846        | Vmn1r47          | -1.92418        |

|  |                   |               |                |                 |
|--|-------------------|---------------|----------------|-----------------|
|  |                   | 18332         | Olfr33         | -1.90223        |
|  |                   | 81015         | Vmn1r56        | -1.62035        |
|  |                   | 18344         | Olfr45         | -1.52067        |
|  |                   | 258343        | Olfr397        | -1.36572        |
|  |                   | 81016         | Vmn1r62        | -1.30782        |
|  |                   | 113848        | Vmn1r42        | -1.29014        |
|  |                   | 18346         | Olfr47         | -1.18329        |
|  |                   | 64379         | Irx6           | -1.01392        |
|  |                   | 81017         | Vmn1r63        | -0.9283         |
|  |                   | 11555         | Adrb2          | -0.92768        |
|  |                   | 14362         | Fzd1           | -0.81648        |
|  |                   | 244701        | Mtnr1b         | -0.7353         |
|  |                   | 26364         | Adgre5         | -0.60643        |
|  |                   | <b>71111</b>  | <b>Gpr39</b>   | <b>0.728031</b> |
|  |                   | <b>18322</b>  | <b>Olfr24</b>  | <b>0.762628</b> |
|  |                   | <b>76206</b>  | <b>Gpr165</b>  | <b>0.849664</b> |
|  |                   | <b>18331</b>  | <b>Olfr32</b>  | <b>0.906447</b> |
|  |                   | <b>13492</b>  | <b>Drd5</b>    | <b>0.966222</b> |
|  |                   | <b>233670</b> | <b>Olfr6</b>   | <b>1.010129</b> |
|  |                   | <b>15552</b>  | <b>Htr1d</b>   | <b>1.221482</b> |
|  |                   | <b>257890</b> | <b>Olfr12</b>  | <b>1.339785</b> |
|  |                   | <b>113850</b> | <b>V1ra8</b>   | <b>1.713639</b> |
|  |                   | <b>18347</b>  | <b>Olfr48</b>  | <b>1.776151</b> |
|  |                   | <b>171469</b> | <b>Gpr3711</b> | <b>1.787234</b> |
|  |                   | <b>258859</b> | <b>Olfr161</b> | <b>3.109598</b> |
|  | Non-odorant GPCRs | 26361         | Avpr1b         | -2.92801        |
|  |                   | 14652         | Glp1r          | -2.36498        |
|  |                   | 17202         | Mc4r           | -2.32772        |
|  |                   | 387347        | Tas2r118       | -2.1135         |
|  |                   | 236781        | Gpr119         | -1.79257        |
|  |                   | 574417        | Tas2r137       | -1.7196         |
|  |                   | 667992        | Tas2r103       | -1.64983        |
|  |                   | 17773         | Mtnr1a         | -1.58287        |
|  |                   | 93746         | Gprc5d         | -1.37834        |
|  |                   | 16867         | Lhcgr          | -1.37102        |
|  |                   | 268934        | Grm4           | -1.33684        |
|  |                   | 57811         | Rgr            | -1.28031        |
|  |                   | 18386         | Oprd1          | -1.27226        |
|  |                   | 15551         | Htr1b          | -1.2463         |
|  |                   | 14309         | Fshr           | -1.17472        |
|  |                   | 15566         | Htr7           | -1.1364         |

|  |                                      |               |                  |                 |
|--|--------------------------------------|---------------|------------------|-----------------|
|  |                                      | 21336         | Tacr1            | -1.12491        |
|  |                                      | 99296         | Hrh3             | -1.05305        |
|  |                                      | 242093        | Rxfp4            | -1.04311        |
|  |                                      | 15562         | Htr4             | -1.03209        |
|  |                                      | 18166         | Npy1r            | -1.02075        |
|  |                                      | 12772         | Ccr2             | -1.00727        |
|  |                                      | 12773         | Ccr4             | -1.00322        |
|  |                                      | 19204         | Ptafr            | -0.97951        |
|  |                                      | 11555         | Adrb2            | -0.92768        |
|  |                                      | 227289        | Gpbar1           | -0.88141        |
|  |                                      | 12776         | Ccr8             | -0.85933        |
|  |                                      | 14362         | Fzd1             | -0.81648        |
|  |                                      | 244701        | Mtnr1b           | -0.7353         |
|  |                                      | 53978         | Lpar2            | -0.61346        |
|  |                                      | 14062         | F2r              | -0.61231        |
|  |                                      | 26364         | Adgre5           | -0.60643        |
|  |                                      | 19219         | Ptger4           | -0.59249        |
|  |                                      | 233571        | P2ry6            | -0.58524        |
|  |                                      | <b>14370</b>  | <b>Fzd8</b>      | <b>0.631495</b> |
|  |                                      | <b>12921</b>  | <b>Crhr1</b>     | <b>0.757531</b> |
|  |                                      | <b>18441</b>  | <b>P2ry1</b>     | <b>0.758201</b> |
|  |                                      | <b>71223</b>  | <b>Gpr15</b>     | <b>0.793225</b> |
|  |                                      | <b>65086</b>  | <b>Lpar3</b>     | <b>0.832089</b> |
|  |                                      | <b>12672</b>  | <b>Chrm4</b>     | <b>0.850005</b> |
|  |                                      | <b>11517</b>  | <b>Adcyap1r1</b> | <b>0.851143</b> |
|  |                                      | <b>13491</b>  | <b>Drd4</b>      | <b>0.875113</b> |
|  |                                      | <b>13492</b>  | <b>Drd5</b>      | <b>0.966222</b> |
|  |                                      | <b>14765</b>  | <b>Gpr50</b>     | <b>1.018872</b> |
|  |                                      | <b>15552</b>  | <b>Htr1d</b>     | <b>1.221482</b> |
|  |                                      | <b>12000</b>  | <b>Avpr2</b>     | <b>1.251924</b> |
|  |                                      | <b>57385</b>  | <b>P2ry4</b>     | <b>1.327103</b> |
|  |                                      | <b>18167</b>  | <b>Npy2r</b>     | <b>1.341246</b> |
|  |                                      | <b>107831</b> | <b>Adgrb1</b>    | <b>1.711902</b> |
|  |                                      | <b>11541</b>  | <b>Adora2b</b>   | <b>1.805445</b> |
|  |                                      | <b>11551</b>  | <b>Adra2a</b>    | <b>2.836444</b> |
|  | Class A/1 (Rhodopsin-like receptors) | 23919         | Insl5            | -4.39738        |
|  |                                      | 26361         | Avpr1b           | -2.92801        |
|  |                                      | 17202         | Mc4r             | -2.32772        |
|  |                                      | 19064         | Ppy              | -2.23412        |
|  |                                      | 217212        | Pyy              | -2.12279        |
|  |                                      | 17773         | Mtnr1a           | -1.58287        |

|  |  |               |                |                 |
|--|--|---------------|----------------|-----------------|
|  |  | 16867         | Lhcgr          | -1.37102        |
|  |  | 18386         | Oprd1          | -1.27226        |
|  |  | 58991         | Ghrl           | -1.26899        |
|  |  | 15551         | Htr1b          | -1.2463         |
|  |  | 16952         | Anxa1          | -1.18898        |
|  |  | 14309         | Fshr           | -1.17472        |
|  |  | 15566         | Htr7           | -1.1364         |
|  |  | 21336         | Tacr1          | -1.12491        |
|  |  | 99296         | Hrh3           | -1.05305        |
|  |  | 242093        | Rxfp4          | -1.04311        |
|  |  | 15562         | Htr4           | -1.03209        |
|  |  | 18166         | Npy1r          | -1.02075        |
|  |  | 12773         | Ccr4           | -1.00322        |
|  |  | 13614         | <i>Edn1</i>    | -0.99296        |
|  |  | 19204         | Ptafr          | -0.97951        |
|  |  | 21333         | Tac1           | -0.97278        |
|  |  | 11555         | Adrb2          | -0.92768        |
|  |  | 227289        | Gpbar1         | -0.88141        |
|  |  | 11606         | Agt            | -0.80285        |
|  |  | 18829         | Ccl21a         | -0.76839        |
|  |  | 244701        | Mtnr1b         | -0.7353         |
|  |  | 319197        | Gpr4           | -0.63098        |
|  |  | 53978         | Lpar2          | -0.61346        |
|  |  | 14062         | F2r            | -0.61231        |
|  |  | 19219         | <i>Ptger4</i>  | -0.59249        |
|  |  | 233571        | P2ry6          | -0.58524        |
|  |  | <b>18441</b>  | <b>P2ry1</b>   | <b>0.758201</b> |
|  |  | <b>65086</b>  | <b>Lpar3</b>   | <b>0.832089</b> |
|  |  | <b>12672</b>  | <b>Chrm4</b>   | <b>0.850005</b> |
|  |  | <b>321020</b> | <b>Fpr-rs6</b> | <b>0.856069</b> |
|  |  | <b>13491</b>  | <b>Drd4</b>    | <b>0.875113</b> |
|  |  | <b>14294</b>  | <b>Fpr3</b>    | <b>0.944948</b> |
|  |  | <b>13492</b>  | <b>Drd5</b>    | <b>0.966222</b> |
|  |  | <b>15552</b>  | <b>Htr1d</b>   | <b>1.221482</b> |
|  |  | <b>12000</b>  | <b>Avpr2</b>   | <b>1.251924</b> |
|  |  | <b>20300</b>  | <b>Ccl25</b>   | <b>1.322852</b> |
|  |  | <b>57385</b>  | <b>P2ry4</b>   | <b>1.327103</b> |
|  |  | <b>18167</b>  | <b>Npy2r</b>   | <b>1.341246</b> |
|  |  | <b>22044</b>  | <b>Trh</b>     | <b>1.380194</b> |
|  |  | <b>252837</b> | <b>Ackr4</b>   | <b>1.449683</b> |
|  |  | <b>11541</b>  | <b>Adora2b</b> | <b>1.805445</b> |

|  |                               |               |                 |                 |
|--|-------------------------------|---------------|-----------------|-----------------|
|  |                               | <b>67405</b>  | <b>Nts</b>      | <b>3.057371</b> |
|  | G alpha (i) signalling events | 23919         | Insl5           | -4.39738        |
|  |                               | 19064         | Ppy             | -2.23412        |
|  |                               | 217212        | Ppy             | -2.12279        |
|  |                               | 387347        | Tas2r118        | -2.1135         |
|  |                               | 574417        | Tas2r137        | -1.7196         |
|  |                               | 667992        | Tas2r103        | -1.64983        |
|  |                               | 17773         | Mtnr1a          | -1.58287        |
|  |                               | 268934        | Grm4            | -1.33684        |
|  |                               | 18386         | Oprd1           | -1.27226        |
|  |                               | 15551         | Htr1b           | -1.2463         |
|  |                               | 16952         | Anxa1           | -1.18898        |
|  |                               | 99296         | Hrh3            | -1.05305        |
|  |                               | 242093        | Rxfp4           | -1.04311        |
|  |                               | 18166         | Npy1r           | -1.02075        |
|  |                               | 12772         | Ccr2            | -1.00727        |
|  |                               | 12773         | Ccr4            | -1.00322        |
|  |                               | 24012         | Rgs7            | -0.96881        |
|  |                               | 12776         | Ccr8            | -0.85933        |
|  |                               | 11606         | Agt             | -0.80285        |
|  |                               | 56470         | Rgs19           | -0.78909        |
|  |                               | 11513         | Adcy7           | -0.76956        |
|  |                               | 18829         | Ccl21a          | -0.76839        |
|  |                               | 244701        | Mtnr1b          | -0.7353         |
|  |                               | 53978         | Lpar2           | -0.61346        |
|  |                               | <b>387343</b> | <b>Tas2r109</b> | <b>0.735099</b> |
|  |                               | <b>65086</b>  | <b>Lpar3</b>    | <b>0.832089</b> |
|  |                               | <b>12672</b>  | <b>Chrm4</b>    | <b>0.850005</b> |
|  |                               | <b>321020</b> | <b>Fpr-rs6</b>  | <b>0.856069</b> |
|  |                               | <b>13491</b>  | <b>Drd4</b>     | <b>0.875113</b> |
|  |                               | <b>14294</b>  | <b>Fpr3</b>     | <b>0.944948</b> |
|  |                               | <b>387356</b> | <b>Tas2r131</b> | <b>0.958132</b> |
|  |                               | <b>15552</b>  | <b>Htr1d</b>    | <b>1.221482</b> |
|  |                               | <b>20300</b>  | <b>Ccl25</b>    | <b>1.322852</b> |
|  | <b>57385</b>                  | <b>P2ry4</b>  | <b>1.327103</b> |                 |
|  | <b>18167</b>                  | <b>Npy2r</b>  | <b>1.341246</b> |                 |
|  | Taste transduction            | 387347        | Tas2r118        | -2.1135         |
|  |                               | 83770         | Tas1r2          | -1.84156        |
|  |                               | 574417        | Tas2r137        | -1.7196         |
|  |                               | 667992        | Tas2r103        | -1.64983        |
|  |                               | 268934        | Grm4            | -1.33684        |

|  |                               |               |                  |                 |
|--|-------------------------------|---------------|------------------|-----------------|
|  |                               | 18796         | Plcb2            | -0.92128        |
|  |                               | 18749         | Prkacb           | -0.69222        |
|  |                               | 18573         | Pde1a            | -0.58797        |
|  |                               | <b>83771</b>  | <b>Tas1r3</b>    | <b>0.629121</b> |
|  |                               | <b>387343</b> | <b>Tas2r109</b>  | <b>0.735099</b> |
|  |                               | <b>387356</b> | <b>Tas2r131</b>  | <b>0.958132</b> |
|  |                               | <b>20277</b>  | <b>Scnn1b</b>    | <b>1.023555</b> |
|  | Monoamine GPCRs               | 15551         | Htr1b            | -1.2463         |
|  |                               | 15566         | Htr7             | -1.1364         |
|  |                               | 15562         | Htr4             | -1.03209        |
|  |                               | 11555         | Adrb2            | -0.92768        |
|  |                               | <b>12672</b>  | <b>Chrm4</b>     | <b>0.850005</b> |
|  |                               | <b>13491</b>  | <b>Drd4</b>      | <b>0.875113</b> |
|  |                               | <b>13492</b>  | <b>Drd5</b>      | <b>0.966222</b> |
|  |                               | <b>15552</b>  | <b>Htr1d</b>     | <b>1.221482</b> |
|  |                               | <b>11551</b>  | <b>Adra2a</b>    | <b>2.836444</b> |
|  | G alpha (s) signalling events | 14652         | Glp1r            | -2.36498        |
|  |                               | 17202         | Mc4r             | -2.32772        |
|  |                               | 16867         | Lhcgr            | -1.37102        |
|  |                               | 14309         | Fshr             | -1.17472        |
|  |                               | 15566         | Htr7             | -1.1364         |
|  |                               | 15562         | Htr4             | -1.03209        |
|  |                               | 11555         | Adrb2            | -0.92768        |
|  |                               | 227289        | Gpbar1           | -0.88141        |
|  |                               | 19227         | Pthlh            | -0.88025        |
|  |                               | 18583         | Pde7a            | -0.84692        |
|  |                               | 11513         | Adcy7            | -0.76956        |
|  |                               | 19219         | <i>Ptger4</i>    | -0.59249        |
|  |                               | 18573         | Pde1a            | -0.58797        |
|  |                               | <b>12921</b>  | <b>Crhr1</b>     | <b>0.757531</b> |
|  |                               | <b>11517</b>  | <b>Adcyap1r1</b> | <b>0.851143</b> |
|  |                               | <b>13492</b>  | <b>Drd5</b>      | <b>0.966222</b> |
|  |                               | <b>12000</b>  | <b>Avpr2</b>     | <b>1.251924</b> |
|  |                               | <b>11541</b>  | <b>Adora2b</b>   | <b>1.805445</b> |
|  |                               | <b>116903</b> | <b>Calcb</b>     | <b>2.19162</b>  |
|  | G alpha (q) signalling events | 26361         | Avpr1b           | -2.92801        |
|  |                               | 14459         | Gast             | -1.80179        |
|  |                               | 58991         | Ghrl             | -1.26899        |
|  |                               | 16952         | Anxa1            | -1.18898        |
|  |                               | 22068         | Trpc6            | -1.15821        |
|  |                               | 21336         | Tacr1            | -1.12491        |

|                        |                                                        |               |                 |                 |
|------------------------|--------------------------------------------------------|---------------|-----------------|-----------------|
|                        |                                                        | 14675         | Gna14           | -1.07872        |
|                        |                                                        | 13614         | Edn1            | -0.99296        |
|                        |                                                        | 19204         | Ptafr           | -0.97951        |
|                        |                                                        | 21333         | Tac1            | -0.97278        |
|                        |                                                        | 18796         | Plcb2           | -0.92128        |
|                        |                                                        | 11606         | Agt             | -0.80285        |
|                        |                                                        | 217480        | Dgkb            | -0.80037        |
|                        |                                                        | 56470         | Rgs19           | -0.78909        |
|                        |                                                        | 319197        | Gpr4            | -0.63098        |
|                        |                                                        | 53978         | Lpar2           | -0.61346        |
|                        |                                                        | 14062         | F2r             | -0.61231        |
|                        |                                                        | 233571        | P2ry6           | -0.58524        |
|                        |                                                        | <b>18441</b>  | <b>P2ry1</b>    | <b>0.758201</b> |
|                        |                                                        | <b>320127</b> | <b>Dgki</b>     | <b>0.800134</b> |
|                        |                                                        | <b>65086</b>  | <b>Lpar3</b>    | <b>0.832089</b> |
|                        |                                                        | <b>321020</b> | <b>Fpr-rs6</b>  | <b>0.856069</b> |
|                        |                                                        | <b>14294</b>  | <b>Fpr3</b>     | <b>0.944948</b> |
|                        |                                                        | <b>14676</b>  | <b>Gna15</b>    | <b>0.956512</b> |
|                        |                                                        | <b>22044</b>  | <b>Trh</b>      | <b>1.380194</b> |
|                        |                                                        | <b>26946</b>  | <b>Trpc7</b>    | <b>1.470884</b> |
|                        |                                                        | <b>67405</b>  | <b>Nts</b>      | <b>3.057371</b> |
|                        | Class C/3 (Metabotropic glutamate/pheromone receptors) | 387347        | Tas2r118        | -2.1135         |
|                        |                                                        | 83770         | Tas1r2          | -1.84156        |
|                        |                                                        | 574417        | Tas2r137        | -1.7196         |
|                        |                                                        | 667992        | Tas2r103        | -1.64983        |
|                        |                                                        | 268934        | Grm4            | -1.33684        |
|                        |                                                        | <b>83771</b>  | <b>Tas1r3</b>   | <b>0.629121</b> |
|                        |                                                        | <b>387343</b> | <b>Tas2r109</b> | <b>0.735099</b> |
|                        |                                                        | <b>387356</b> | <b>Tas2r131</b> | <b>0.958132</b> |
|                        | Amine ligand-binding receptors                         | 15551         | Htr1b           | -1.2463         |
|                        |                                                        | 15566         | Htr7            | -1.1364         |
|                        |                                                        | 99296         | Hrh3            | -1.05305        |
|                        |                                                        | 15562         | Htr4            | -1.03209        |
|                        |                                                        | 11555         | Adrb2           | -0.92768        |
|                        |                                                        | <b>12672</b>  | <b>Chrm4</b>    | <b>0.850005</b> |
|                        |                                                        | <b>13491</b>  | <b>Drd4</b>     | <b>0.875113</b> |
|                        |                                                        | <b>13492</b>  | <b>Drd5</b>     | <b>0.966222</b> |
|                        |                                                        | <b>15552</b>  | <b>Htr1d</b>    | <b>1.221482</b> |
| Xenobiotics metabolism | Phase 1 - Functionalization of compounds               | 11522         | Adh1            | -1.67577        |
|                        |                                                        | 21391         | Tbxas1          | -0.73684        |
|                        |                                                        | 14261         | Fmo1            | -0.72381        |



|  |                       |        |         |          |
|--|-----------------------|--------|---------|----------|
|  |                       | 74519  | Cyp2j9  | 0.814402 |
|  |                       | 13115  | Cyp27b1 | 0.848137 |
|  |                       | 13110  | Cyp2j6  | 0.907245 |
|  |                       | 13119  | Cyp4a14 | 0.98224  |
|  |                       | 665095 | Cyp2j8  | 0.987507 |
|  |                       | 26358  | Aldh1a7 | 1.035068 |
|  |                       | 13097  | Cyp2c38 | 1.138673 |
|  |                       | 13112  | Cyp3a11 | 1.348164 |
|  |                       | 244209 | Cyp2r1  | 1.52365  |
|  |                       | 13117  | Cyp4a10 | 1.548098 |
|  |                       | 13089  | Cyp2b13 | 1.987011 |
|  |                       | 11668  | Aldh1a1 | 2.031233 |
|  |                       | 72303  | Cyp2c65 | 2.567495 |
|  |                       | 13120  | Cyp4b1  | 2.85414  |
|  |                       | 69888  | Cyp2c66 | 3.077231 |
|  |                       | 13114  | Cyp3a16 | 3.547892 |
|  | Biological oxidations | 17962  | Nat3    | -2.67001 |
|  |                       | 11522  | Adh1    | -1.67577 |
|  |                       | 21391  | Tbxas1  | -0.73684 |
|  |                       | 14261  | Fmo1    | -0.72381 |
|  |                       | 14630  | Gclm    | 0.716835 |
|  |                       | 22017  | Tpmt    | 0.71723  |
|  |                       | 242585 | Slc35d1 | 0.769778 |
|  |                       | 68214  | Gsto2   | 0.779804 |
|  |                       | 74519  | Cyp2j9  | 0.814402 |
|  |                       | 14629  | Gclc    | 0.845164 |
|  |                       | 13115  | Cyp27b1 | 0.848137 |
|  |                       | 13110  | Cyp2j6  | 0.907245 |
|  |                       | 13119  | Cyp4a14 | 0.98224  |
|  |                       | 665095 | Cyp2j8  | 0.987507 |
|  |                       | 14873  | Gsto1   | 1.021687 |
|  |                       | 26358  | Aldh1a7 | 1.035068 |
|  |                       | 94284  | Ugt1a6a | 1.076336 |
|  |                       | 13097  | Cyp2c38 | 1.138673 |
|  |                       | 22235  | Ugdh    | 1.1947   |
|  |                       | 13112  | Cyp3a11 | 1.348164 |
|  |                       | 244209 | Cyp2r1  | 1.52365  |
|  |                       | 231583 | Slc26a1 | 1.545867 |
|  |                       | 13117  | Cyp4a10 | 1.548098 |
|  |                       | 13089  | Cyp2b13 | 1.987011 |
|  |                       | 11668  | Aldh1a1 | 2.031233 |

|  |                                              |               |                |                 |
|--|----------------------------------------------|---------------|----------------|-----------------|
|  |                                              | <b>72303</b>  | <b>Cyp2c65</b> | <b>2.567495</b> |
|  |                                              | <b>13120</b>  | <b>Cyp4b1</b>  | <b>2.85414</b>  |
|  |                                              | <b>69888</b>  | <b>Cyp2c66</b> | <b>3.077231</b> |
|  |                                              | <b>13114</b>  | <b>Cyp3a16</b> | <b>3.547892</b> |
|  | Drug metabolism - other enzymes              | 17962         | Nat3           | -2.67001        |
|  |                                              | 72361         | Ces2g          | -0.84415        |
|  |                                              | <b>22017</b>  | <b>Tpmt</b>    | <b>0.71723</b>  |
|  |                                              | <b>94284</b>  | <b>Ugt1a6a</b> | <b>1.076336</b> |
|  |                                              | <b>394430</b> | <b>Ugt1a10</b> | <b>1.138556</b> |
|  |                                              | <b>13112</b>  | <b>Cyp3a11</b> | <b>1.348164</b> |
|  |                                              | <b>394435</b> | <b>Ugt1a6b</b> | <b>1.551736</b> |
|  |                                              | <b>99586</b>  | <b>Dpyd</b>    | <b>1.940333</b> |
|  |                                              | <b>13897</b>  | <b>Ces1e</b>   | <b>2.017295</b> |
|  |                                              | <b>104158</b> | <b>Ces1d</b>   | <b>2.38827</b>  |
|  |                                              | <b>112417</b> | <b>Ugt2b37</b> | <b>2.589247</b> |
|  |                                              | <b>13114</b>  | <b>Cyp3a16</b> | <b>3.547892</b> |
|  |                                              | <b>100559</b> | <b>Ugt2b38</b> | <b>4.110325</b> |
|  | Drug metabolism - cytochrome P450            | 11522         | Adh1           | -1.67577        |
|  |                                              | 226143        | Cyp2c44        | -1.0174         |
|  |                                              | 14261         | Fmo1           | -0.72381        |
|  |                                              | 68214         | Gsto2          | 0.779804        |
|  |                                              | <b>11532</b>  | <b>Adh5</b>    | <b>0.855127</b> |
|  |                                              | <b>14873</b>  | <b>Gsto1</b>   | <b>1.021687</b> |
|  |                                              | <b>94284</b>  | <b>Ugt1a6a</b> | <b>1.076336</b> |
|  |                                              | <b>394430</b> | <b>Ugt1a10</b> | <b>1.138556</b> |
|  |                                              | <b>13097</b>  | <b>Cyp2c38</b> | <b>1.138673</b> |
|  |                                              | <b>13112</b>  | <b>Cyp3a11</b> | <b>1.348164</b> |
|  |                                              | <b>394435</b> | <b>Ugt1a6b</b> | <b>1.551736</b> |
|  |                                              | <b>13089</b>  | <b>Cyp2b13</b> | <b>1.987011</b> |
|  |                                              | <b>72303</b>  | <b>Cyp2c65</b> | <b>2.567495</b> |
|  |                                              | <b>112417</b> | <b>Ugt2b37</b> | <b>2.589247</b> |
|  |                                              | <b>69888</b>  | <b>Cyp2c66</b> | <b>3.077231</b> |
|  |                                              | <b>13114</b>  | <b>Cyp3a16</b> | <b>3.547892</b> |
|  |                                              | <b>100559</b> | <b>Ugt2b38</b> | <b>4.110325</b> |
|  | Cytochrome P450 - arranged by substrate type | 21391         | Tbxas1         | -0.73684        |
|  |                                              | <b>74519</b>  | <b>Cyp2j9</b>  | <b>0.814402</b> |
|  |                                              | <b>13115</b>  | <b>Cyp27b1</b> | <b>0.848137</b> |
|  |                                              | <b>13110</b>  | <b>Cyp2j6</b>  | <b>0.907245</b> |
|  |                                              | <b>13119</b>  | <b>Cyp4a14</b> | <b>0.98224</b>  |
|  |                                              | <b>665095</b> | <b>Cyp2j8</b>  | <b>0.987507</b> |
|  |                                              | <b>13097</b>  | <b>Cyp2c38</b> | <b>1.138673</b> |

|            |                              |                    |                  |          |          |
|------------|------------------------------|--------------------|------------------|----------|----------|
|            |                              | 13112              | Cyp3a11          | 1.348164 |          |
|            |                              | 244209             | Cyp2r1           | 1.52365  |          |
|            |                              | 13117              | Cyp4a10          | 1.548098 |          |
|            |                              | 13089              | Cyp2b13          | 1.987011 |          |
|            |                              | 72303              | Cyp2c65          | 2.567495 |          |
|            |                              | 13120              | Cyp4b1           | 2.85414  |          |
|            |                              | 69888              | Cyp2c66          | 3.077231 |          |
|            |                              | 13114              | Cyp3a16          | 3.547892 |          |
| Metabolism | Steroid hormone biosynthesis | 15495              | Hsd3b4           | -2.1935  |          |
|            |                              | 15485              | Hsd17b1          | -1.70289 |          |
|            |                              | 94224              | Srd5a2           | -1.65185 |          |
|            |                              | 13079              | Cyp21a1          | 0.882118 |          |
|            |                              | 94284              | Ugt1a6a          | 1.076336 |          |
|            |                              | 394430             | Ugt1a10          | 1.138556 |          |
|            |                              | 13112              | Cyp3a11          | 1.348164 |          |
|            |                              | 394435             | Ugt1a6b          | 1.551736 |          |
|            |                              | 27400              | Hsd17b6          | 1.632182 |          |
|            |                              | 105349             | Akr1c18          | 1.966455 |          |
|            |                              | 112417             | Ugt2b37          | 2.589247 |          |
|            |                              | 13114              | Cyp3a16          | 3.547892 |          |
|            |                              | 100559             | Ugt2b38          | 4.110325 |          |
|            |                              |                    | Steroid hormones | 15495    | Hsd3b4   |
|            |                              | 15485              |                  | Hsd17b1  | -1.70289 |
|            |                              | 14725              |                  | Lrp2     | -1.65004 |
|            |                              | 11677              |                  | Akr1b3   | -0.65276 |
|            |                              | 13115              |                  | Cyp27b1  | 0.848137 |
|            |                              | 170460             |                  | Stard5   | 1.02616  |
|            |                              | 244209             |                  | Cyp2r1   | 1.52365  |
|            |                              | 65969              |                  | Cubn     | 1.724354 |
|            |                              | Retinol metabolism | 11522            | Adh1     | -1.67577 |
|            |                              |                    | 226143           | Cyp2c44  | -1.0174  |
|            |                              |                    | 67442            | Retsat   | 0.81903  |
|            |                              |                    | 11532            | Adh5     | 0.855127 |
|            |                              |                    | 13119            | Cyp4a14  | 0.98224  |
|            |                              |                    | 26358            | Aldh1a7  | 1.035068 |
|            |                              |                    | 94284            | Ugt1a6a  | 1.076336 |
|            |                              |                    | 394430           | Ugt1a10  | 1.138556 |
|            |                              |                    | 13097            | Cyp2c38  | 1.138673 |
|            |                              |                    | 13112            | Cyp3a11  | 1.348164 |
|            |                              |                    | 13117            | Cyp4a10  | 1.548098 |
|            |                              | 394435             | Ugt1a6b          | 1.551736 |          |

|                   |                                   |        |         |          |
|-------------------|-----------------------------------|--------|---------|----------|
|                   |                                   | 27400  | Hsd17b6 | 1.632182 |
|                   |                                   | 13089  | Cyp2b13 | 1.987011 |
|                   |                                   | 11668  | Aldh1a1 | 2.031233 |
|                   |                                   | 72303  | Cyp2c65 | 2.567495 |
|                   |                                   | 112417 | Ugt2b37 | 2.589247 |
|                   |                                   | 69888  | Cyp2c66 | 3.077231 |
|                   |                                   | 13114  | Cyp3a16 | 3.547892 |
|                   |                                   | 100559 | Ugt2b38 | 4.110325 |
|                   | Ascorbate and aldarate metabolism | 268756 | Gulo    | -1.23563 |
|                   |                                   | 56727  | Miox    | -0.60614 |
|                   |                                   | 11671  | Aldh3a2 | 0.748732 |
|                   |                                   | 94284  | Ugt1a6a | 1.076336 |
|                   |                                   | 394430 | Ugt1a10 | 1.138556 |
|                   |                                   | 22235  | Ugdh    | 1.1947   |
|                   |                                   | 394435 | Ugt1a6b | 1.551736 |
|                   |                                   | 112417 | Ugt2b37 | 2.589247 |
|                   |                                   | 100559 | Ugt2b38 | 4.110325 |
|                   | Vitamin D (calciferol) metabolism | 14725  | Lrp2    | -1.65004 |
|                   |                                   | 13115  | Cyp27b1 | 0.848137 |
|                   |                                   | 244209 | Cyp2r1  | 1.52365  |
|                   |                                   | 65969  | Cubn    | 1.724354 |
| Cancer signalling | Chemical carcinogenesis           | 17962  | Nat3    | -2.67001 |
|                   |                                   | 11441  | Chrna7  | -2.35055 |
|                   |                                   | 11522  | Adh1    | -1.67577 |
|                   |                                   | 226143 | Cyp2c44 | -1.0174  |
|                   |                                   | 68214  | Gsto2   | 0.779804 |
|                   |                                   | 11532  | Adh5    | 0.855127 |
|                   |                                   | 14873  | Gsto1   | 1.021687 |
|                   |                                   | 94284  | Ugt1a6a | 1.076336 |
|                   |                                   | 394430 | Ugt1a10 | 1.138556 |
|                   |                                   | 13097  | Cyp2c38 | 1.138673 |
|                   |                                   | 13112  | Cyp3a11 | 1.348164 |
|                   |                                   | 394435 | Ugt1a6b | 1.551736 |
|                   |                                   | 13089  | Cyp2b13 | 1.987011 |
|                   |                                   | 72303  | Cyp2c65 | 2.567495 |
|                   |                                   | 112417 | Ugt2b37 | 2.589247 |
|                   |                                   | 69888  | Cyp2c66 | 3.077231 |
|                   |                                   | 13114  | Cyp3a16 | 3.547892 |
|                   |                                   | 100559 | Ugt2b38 | 4.110325 |
| Digestive system  | Recycling of bile acids and salts | 11657  | Alb     | -2.74905 |
|                   |                                   | 28248  | Slco1a1 | -0.71482 |

|  |                          |               |                 |                 |
|--|--------------------------|---------------|-----------------|-----------------|
|  |                          | <b>28250</b>  | <b>Slco1a4</b>  | <b>0.702863</b> |
|  |                          | <b>76408</b>  | <b>Abcc3</b>    | <b>0.938123</b> |
|  |                          | <b>12012</b>  | <b>Baat</b>     | <b>1.013347</b> |
|  |                          | <b>20494</b>  | <b>Slc10a2</b>  | <b>1.82269</b>  |
|  |                          | <b>16204</b>  | <b>Fabp6</b>    | <b>1.881719</b> |
|  | Fatty acid degradation   | 11522         | Adh1            | -1.67577        |
|  |                          | <b>52538</b>  | <b>Acaa2</b>    | <b>0.61326</b>  |
|  |                          | <b>13177</b>  | <b>Eci1</b>     | <b>0.621129</b> |
|  |                          | <b>66885</b>  | <b>Acadsb</b>   | <b>0.666439</b> |
|  |                          | <b>113868</b> | <b>Acaa1a</b>   | <b>0.689297</b> |
|  |                          | <b>231086</b> | <b>Hadhb</b>    | <b>0.706245</b> |
|  |                          | <b>11671</b>  | <b>Aldh3a2</b>  | <b>0.748732</b> |
|  |                          | <b>328845</b> | <b>Acsbg2</b>   | <b>0.760246</b> |
|  |                          | <b>11532</b>  | <b>Adh5</b>     | <b>0.855127</b> |
|  |                          | <b>235674</b> | <b>Acaa1b</b>   | <b>0.869636</b> |
|  |                          | <b>11409</b>  | <b>Acads</b>    | <b>0.887581</b> |
|  |                          | <b>13119</b>  | <b>Cyp4a14</b>  | <b>0.98224</b>  |
|  |                          | <b>13117</b>  | <b>Cyp4a10</b>  | <b>1.548098</b> |
|  | Linoleic acid metabolism | 271844        | Pla2g4f         | -2.42912        |
|  |                          | 26971         | Pla2g2f         | -2.37882        |
|  |                          | 226143        | Cyp2c44         | -1.0174         |
|  |                          | <b>74519</b>  | <b>Cyp2j9</b>   | <b>0.814402</b> |
|  |                          | <b>13110</b>  | <b>Cyp2j6</b>   | <b>0.907245</b> |
|  |                          | <b>665095</b> | <b>Cyp2j8</b>   | <b>0.987507</b> |
|  |                          | <b>13097</b>  | <b>Cyp2c38</b>  | <b>1.138673</b> |
|  |                          | <b>69836</b>  | <b>Pla2g12b</b> | <b>1.148404</b> |
|  |                          | <b>13112</b>  | <b>Cyp3a11</b>  | <b>1.348164</b> |
|  |                          | <b>72303</b>  | <b>Cyp2c65</b>  | <b>2.567495</b> |
|  |                          | <b>69888</b>  | <b>Cyp2c66</b>  | <b>3.077231</b> |
|  |                          | <b>13114</b>  | <b>Cyp3a16</b>  | <b>3.547892</b> |
|  | Bile secretion           | 11513         | Adcy7           | -0.76956        |
|  |                          | 28248         | Slco1a1         | -0.71482        |
|  |                          | 18749         | Prkacb          | -0.69222        |
|  |                          | <b>232975</b> | <b>Atp1a3</b>   | <b>0.693361</b> |
|  |                          | <b>28250</b>  | <b>Slco1a4</b>  | <b>0.702863</b> |
|  |                          | <b>19879</b>  | <b>Slc22a8</b>  | <b>0.786054</b> |
|  |                          | <b>20181</b>  | <b>Rxra</b>     | <b>0.864973</b> |
|  |                          | <b>20535</b>  | <b>Slc4a2</b>   | <b>0.871771</b> |
|  |                          | <b>11826</b>  | <b>Aqp1</b>     | <b>0.907644</b> |
|  |                          | <b>320024</b> | <b>Nceh1</b>    | <b>0.933867</b> |
|  |                          | <b>18669</b>  | <b>Abcb1b</b>   | <b>0.937074</b> |

|                        |                                            |               |                |                 |
|------------------------|--------------------------------------------|---------------|----------------|-----------------|
|                        |                                            | <b>76408</b>  | <b>Abcc3</b>   | <b>0.938123</b> |
|                        |                                            | <b>20186</b>  | <b>Nr1h4</b>   | <b>0.960415</b> |
|                        |                                            | <b>12012</b>  | <b>Baat</b>    | <b>1.013347</b> |
|                        |                                            | <b>20494</b>  | <b>Slc10a2</b> | <b>1.82269</b>  |
|                        |                                            | <b>106407</b> | <b>Slc51a</b>  | <b>4.426367</b> |
|                        | Fatty acids                                | <b>74519</b>  | <b>Cyp2j9</b>  | <b>0.814402</b> |
|                        |                                            | <b>13110</b>  | <b>Cyp2j6</b>  | <b>0.907245</b> |
|                        |                                            | <b>13119</b>  | <b>Cyp4a14</b> | <b>0.98224</b>  |
|                        |                                            | <b>665095</b> | <b>Cyp2j8</b>  | <b>0.987507</b> |
|                        |                                            | <b>13117</b>  | <b>Cyp4a10</b> | <b>1.548098</b> |
|                        |                                            | <b>13120</b>  | <b>Cyp4b1</b>  | <b>2.85414</b>  |
| Transport of molecules | Transmembrane transport of small molecules | 108017        | Fxyd4          | -3.68939        |
|                        |                                            | 192113        | Atp12a         | -3.62413        |
|                        |                                            | 11657         | Alb            | -2.74905        |
|                        |                                            | 56643         | Slc15a1        | -2.27435        |
|                        |                                            | 20538         | Slc6a2         | -2.24272        |
|                        |                                            | 242341        | Atp6v0d2       | -2.21608        |
|                        |                                            | 114304        | Slc28a3        | -2.10056        |
|                        |                                            | 338375        | Atp6v1g3       | -2.04699        |
|                        |                                            | 64177         | Trpv6          | -1.87407        |
|                        |                                            | 243616        | Slc6a11        | -1.32681        |
|                        |                                            | 101772        | Ano1           | -1.271          |
|                        |                                            | 236727        | Slc9a7         | -1.24181        |
|                        |                                            | 11827         | Aqp2           | -1.22025        |
|                        |                                            | 52466         | Slc46a1        | -1.1807         |
|                        |                                            | 140919        | Slc17a6        | -1.17003        |
|                        |                                            | 22068         | Trpc6          | -1.15821        |
|                        |                                            | 14377         | G6pc           | -1.15001        |
|                        |                                            | 69047         | Atp2c2         | -1.14854        |
|                        |                                            | 20531         | Slc34a2        | -1.10194        |
|                        |                                            | 193034        | Trpv1          | -1.09319        |
|                        |                                            | 22368         | Trpv2          | -1.04169        |
|                        |                                            | 53881         | Slc5a3         | -1.03602        |
|                        |                                            | 215335        | Slc36a1        | -0.77241        |
|                        |                                            | 381072        | Abca17         | -0.77097        |
|                        |                                            | 11513         | Adcy7          | -0.76956        |
|                        |                                            | 20513         | Slc1a6         | -0.73881        |
|                        |                                            | 14710         | Gngt2          | -0.72984        |
|                        |                                            | 28248         | Slco1a1        | -0.71482        |
|                        |                                            | 108116        | Slco3a1        | -0.70872        |
|                        |                                            | 17364         | Trpm1          | -0.7033         |

|  |  |               |                 |                 |
|--|--|---------------|-----------------|-----------------|
|  |  | 18749         | Prkacb          | -0.69222        |
|  |  | 57274         | Slc16a8         | -0.68227        |
|  |  | 11977         | Atp7a           | -0.67643        |
|  |  | 338370        | Nalcn           | -0.62935        |
|  |  | 22041         | Trf             | -0.6144         |
|  |  | <b>56517</b>  | <b>Slc22a21</b> | <b>0.601124</b> |
|  |  | <b>230612</b> | <b>Slc5a9</b>   | <b>0.66179</b>  |
|  |  | <b>232975</b> | <b>Atp1a3</b>   | <b>0.693361</b> |
|  |  | <b>28250</b>  | <b>Slco1a4</b>  | <b>0.702863</b> |
|  |  | <b>22782</b>  | <b>Slc30a1</b>  | <b>0.719359</b> |
|  |  | <b>101488</b> | <b>Slco2b1</b>  | <b>0.727811</b> |
|  |  | <b>242585</b> | <b>Slc35d1</b>  | <b>0.769778</b> |
|  |  | <b>26457</b>  | <b>Slc27a1</b>  | <b>0.77524</b>  |
|  |  | <b>27376</b>  | <b>Slc25a10</b> | <b>0.778687</b> |
|  |  | <b>27416</b>  | <b>Abcc5</b>    | <b>0.785076</b> |
|  |  | <b>19879</b>  | <b>Slc22a8</b>  | <b>0.786054</b> |
|  |  | <b>14401</b>  | <b>Gabrb2</b>   | <b>0.829711</b> |
|  |  | <b>26569</b>  | <b>Slc27a4</b>  | <b>0.832769</b> |
|  |  | <b>70484</b>  | <b>Slc35d2</b>  | <b>0.868659</b> |
|  |  | <b>20535</b>  | <b>Slc4a2</b>   | <b>0.871771</b> |
|  |  | <b>380701</b> | <b>Slc47a2</b>  | <b>0.898028</b> |
|  |  | <b>11826</b>  | <b>Aqp1</b>     | <b>0.907644</b> |
|  |  | <b>18669</b>  | <b>Abcb1b</b>   | <b>0.937074</b> |
|  |  | <b>76408</b>  | <b>Abcc3</b>    | <b>0.938123</b> |
|  |  | <b>68667</b>  | <b>Trpm4</b>    | <b>0.951637</b> |
|  |  | <b>74915</b>  | <b>Atp6v1e2</b> | <b>0.979016</b> |
|  |  | <b>216227</b> | <b>Slc17a8</b>  | <b>0.992313</b> |
|  |  | <b>11945</b>  | <b>Atp4b</b>    | <b>0.994119</b> |
|  |  | <b>58176</b>  | <b>Rhbg</b>     | <b>1.005961</b> |
|  |  | <b>20277</b>  | <b>Scnn1b</b>   | <b>1.023555</b> |
|  |  | <b>24115</b>  | <b>Best1</b>    | <b>1.027966</b> |
|  |  | <b>21366</b>  | <b>Slc6a6</b>   | <b>1.050288</b> |
|  |  | <b>110886</b> | <b>Gabra5</b>   | <b>1.055243</b> |
|  |  | <b>20541</b>  | <b>Slc8a1</b>   | <b>1.065224</b> |
|  |  | <b>20533</b>  | <b>Slc4a1</b>   | <b>1.10896</b>  |
|  |  | <b>74104</b>  | <b>Abcb6</b>    | <b>1.120286</b> |
|  |  | <b>20539</b>  | <b>Slc7a5</b>   | <b>1.133807</b> |
|  |  | <b>237831</b> | <b>Slc13a5</b>  | <b>1.161357</b> |
|  |  | <b>67547</b>  | <b>Slc39a8</b>  | <b>1.210859</b> |
|  |  | <b>12000</b>  | <b>Avpr2</b>    | <b>1.251924</b> |
|  |  | <b>26946</b>  | <b>Trpc7</b>    | <b>1.470884</b> |

|  |                                         |               |                 |                 |
|--|-----------------------------------------|---------------|-----------------|-----------------|
|  |                                         | <b>30805</b>  | <b>Slc22a4</b>  | <b>1.524987</b> |
|  |                                         | <b>231583</b> | <b>Slc26a1</b>  | <b>1.545867</b> |
|  |                                         | <b>20519</b>  | <b>Slc22a3</b>  | <b>1.948204</b> |
|  |                                         | <b>67473</b>  | <b>Slc47a1</b>  | <b>2.161129</b> |
|  |                                         | <b>74338</b>  | <b>Slc6a19</b>  | <b>2.361178</b> |
|  | SLC-mediated<br>transmembrane transport | 11657         | Alb             | -2.74905        |
|  |                                         | 56643         | Slc15a1         | -2.27435        |
|  |                                         | 20538         | Slc6a2          | -2.24272        |
|  |                                         | 114304        | Slc28a3         | -2.10056        |
|  |                                         | 243616        | Slc6a11         | -1.32681        |
|  |                                         | 236727        | Slc9a7          | -1.24181        |
|  |                                         | 140919        | Slc17a6         | -1.17003        |
|  |                                         | 14377         | G6pc            | -1.15001        |
|  |                                         | 20531         | Slc34a2         | -1.10194        |
|  |                                         | 53881         | Slc5a3          | -1.03602        |
|  |                                         | 215335        | Slc36a1         | -0.77241        |
|  |                                         | 20513         | Slc1a6          | -0.73881        |
|  |                                         | 28248         | Slco1a1         | -0.71482        |
|  |                                         | 108116        | Slco3a1         | -0.70872        |
|  |                                         | 57274         | Slc16a8         | -0.68227        |
|  |                                         | <b>56517</b>  | <b>Slc22a21</b> | <b>0.601124</b> |
|  |                                         | <b>230612</b> | <b>Slc5a9</b>   | <b>0.66179</b>  |
|  |                                         | <b>28250</b>  | <b>Slco1a4</b>  | <b>0.702863</b> |
|  |                                         | <b>22782</b>  | <b>Slc30a1</b>  | <b>0.719359</b> |
|  |                                         | <b>101488</b> | <b>Slco2b1</b>  | <b>0.727811</b> |
|  |                                         | <b>242585</b> | <b>Slc35d1</b>  | <b>0.769778</b> |
|  |                                         | <b>26457</b>  | <b>Slc27a1</b>  | <b>0.77524</b>  |
|  |                                         | <b>27376</b>  | <b>Slc25a10</b> | <b>0.778687</b> |
|  |                                         | <b>19879</b>  | <b>Slc22a8</b>  | <b>0.786054</b> |
|  |                                         | <b>26569</b>  | <b>Slc27a4</b>  | <b>0.832769</b> |
|  |                                         | <b>70484</b>  | <b>Slc35d2</b>  | <b>0.868659</b> |
|  |                                         | <b>20535</b>  | <b>Slc4a2</b>   | <b>0.871771</b> |
|  |                                         | <b>380701</b> | <b>Slc47a2</b>  | <b>0.898028</b> |
|  |                                         | <b>216227</b> | <b>Slc17a8</b>  | <b>0.992313</b> |
|  |                                         | <b>58176</b>  | <b>Rhbg</b>     | <b>1.005961</b> |
|  |                                         | <b>21366</b>  | <b>Slc6a6</b>   | <b>1.050288</b> |
|  |                                         | <b>20541</b>  | <b>Slc8a1</b>   | <b>1.065224</b> |
|  |                                         | <b>20533</b>  | <b>Slc4a1</b>   | <b>1.10896</b>  |
|  |                                         | <b>20539</b>  | <b>Slc7a5</b>   | <b>1.133807</b> |
|  |                                         | <b>237831</b> | <b>Slc13a5</b>  | <b>1.161357</b> |
|  |                                         | <b>67547</b>  | <b>Slc39a8</b>  | <b>1.210859</b> |



|                      |                                                                 |                                            |                |                 |
|----------------------|-----------------------------------------------------------------|--------------------------------------------|----------------|-----------------|
|                      |                                                                 | <b>30805</b>                               | <b>Slc22a4</b> | <b>1.524987</b> |
|                      |                                                                 | <b>231583</b>                              | <b>Slc26a1</b> | <b>1.545867</b> |
|                      |                                                                 | <b>20519</b>                               | <b>Slc22a3</b> | <b>1.948204</b> |
|                      |                                                                 | <b>67473</b>                               | <b>Slc47a1</b> | <b>2.161129</b> |
|                      |                                                                 | <b>74338</b>                               | <b>Slc6a19</b> | <b>2.361178</b> |
|                      | Transport of vitamins,<br>nucleosides, and related<br>molecules | 11657                                      | Alb            | -2.74905        |
|                      |                                                                 | 114304                                     | Slc28a3        | -2.10056        |
|                      |                                                                 | 28248                                      | Slco1a1        | -0.71482        |
|                      |                                                                 | 108116                                     | Slco3a1        | -0.70872        |
|                      |                                                                 | <b>28250</b>                               | <b>Slco1a4</b> | <b>0.702863</b> |
|                      |                                                                 | <b>101488</b>                              | <b>Slco2b1</b> | <b>0.727811</b> |
|                      |                                                                 | <b>242585</b>                              | <b>Slc35d1</b> | <b>0.769778</b> |
|                      |                                                                 | <b>26457</b>                               | <b>Slc27a1</b> | <b>0.77524</b>  |
|                      |                                                                 | <b>26569</b>                               | <b>Slc27a4</b> | <b>0.832769</b> |
|                      |                                                                 | <b>70484</b>                               | <b>Slc35d2</b> | <b>0.868659</b> |
| Neuronal<br>response |                                                                 | Neuroactive ligand-receptor<br>interaction | 14608          | Gpr83           |
|                      | 26361                                                           |                                            | Avpr1b         | -2.92801        |
|                      | 14652                                                           |                                            | Glp1r          | -2.36498        |
|                      | 11441                                                           |                                            | Chrna7         | -2.35055        |
|                      | 17202                                                           |                                            | Mc4r           | -2.32772        |
|                      | 209513                                                          |                                            | Taar4          | -1.97343        |
|                      | 17773                                                           |                                            | Mtnr1a         | -1.58287        |
|                      | 16867                                                           |                                            | Lhcgr          | -1.37102        |
|                      | 209517                                                          |                                            | Taar7b         | -1.36067        |
|                      | 268934                                                          |                                            | Grm4           | -1.33684        |
|                      | 18386                                                           |                                            | Oprd1          | -1.27226        |
|                      | 15551                                                           |                                            | Htr1b          | -1.2463         |
|                      | 14309                                                           |                                            | Fshr           | -1.17472        |
|                      | 15566                                                           |                                            | Htr7           | -1.1364         |
|                      | 21336                                                           |                                            | Tacr1          | -1.12491        |
|                      | 193034                                                          |                                            | Trpv1          | -1.09319        |
|                      | 99296                                                           |                                            | Hrh3           | -1.05305        |
|                      | 15562                                                           |                                            | Htr4           | -1.03209        |
|                      | 18166                                                           |                                            | Npy1r          | -1.02075        |
|                      | 18815                                                           |                                            | Plg            | -1.00547        |
|                      | 435207                                                          |                                            | Taar7f         | -0.98449        |
|                      | 19204                                                           |                                            | Ptafr          | -0.97951        |
|                      | 11555                                                           |                                            | Adrb2          | -0.92768        |
|                      | 244701                                                          |                                            | Mtnr1b         | -0.7353         |
|                      | 53978                                                           |                                            | Lpar2          | -0.61346        |
|                      | 14062                                                           |                                            | F2r            | -0.61231        |

|  |                     |               |                  |                 |
|--|---------------------|---------------|------------------|-----------------|
|  |                     | 19219         | <i>Ptger4</i>    | -0.59249        |
|  |                     | 233571        | P2ry6            | -0.58524        |
|  |                     | <b>14403</b>  | <b>Gabrd</b>     | <b>0.701059</b> |
|  |                     | <b>12921</b>  | <b>Crhr1</b>     | <b>0.757531</b> |
|  |                     | <b>18441</b>  | <b>P2ry1</b>     | <b>0.758201</b> |
|  |                     | <b>14401</b>  | <b>Gabrb2</b>    | <b>0.829711</b> |
|  |                     | <b>65086</b>  | <b>Lpar3</b>     | <b>0.832089</b> |
|  |                     | <b>12672</b>  | <b>Chrm4</b>     | <b>0.850005</b> |
|  |                     | <b>11517</b>  | <b>Adcyap1r1</b> | <b>0.851143</b> |
|  |                     | <b>14812</b>  | <b>Grin2b</b>    | <b>0.871054</b> |
|  |                     | <b>13491</b>  | <b>Drd4</b>      | <b>0.875113</b> |
|  |                     | <b>14294</b>  | <b>Fpr3</b>      | <b>0.944948</b> |
|  |                     | <b>13492</b>  | <b>Drd5</b>      | <b>0.966222</b> |
|  |                     | <b>14765</b>  | <b>Gpr50</b>     | <b>1.018872</b> |
|  |                     | <b>14599</b>  | <b>Gh</b>        | <b>1.043182</b> |
|  |                     | <b>110886</b> | <b>Gabra5</b>    | <b>1.055243</b> |
|  |                     | <b>15552</b>  | <b>Htr1d</b>     | <b>1.221482</b> |
|  |                     | <b>12000</b>  | <b>Avpr2</b>     | <b>1.251924</b> |
|  |                     | <b>215854</b> | <b>Taar5</b>     | <b>1.272795</b> |
|  |                     | <b>57385</b>  | <b>P2ry4</b>     | <b>1.327103</b> |
|  |                     | <b>18167</b>  | <b>Npy2r</b>     | <b>1.341246</b> |
|  |                     | <b>19116</b>  | <b>Prlr</b>      | <b>1.437521</b> |
|  |                     | <b>14938</b>  | <b>Gzma</b>      | <b>1.654691</b> |
|  |                     | <b>11541</b>  | <b>Adora2b</b>   | <b>1.805445</b> |
|  |                     | <b>108043</b> | <b>Chrn3</b>     | <b>1.954763</b> |
|  |                     | <b>11551</b>  | <b>Adra2a</b>    | <b>2.836444</b> |
|  | Serotonin receptors | 15551         | Htr1b            | -1.2463         |
|  |                     | 15566         | Htr7             | -1.1364         |
|  |                     | 15562         | Htr4             | -1.03209        |
|  |                     | <b>15552</b>  | <b>Htr1d</b>     | <b>1.221482</b> |

**Supplementary Table 4:** Details results of ORA after 21 days of exposure of E171 in BALB/c mice in combination with AOM/DSS. Numbers in bold correspond to upregulated genes. Log2FC= Log2 fold change obtained with LIMMA script with correction for its own time-matched control.

| Group of pathways | Pathways                      | EntrezGeneID    | Genes           | Log2FC          |
|-------------------|-------------------------------|-----------------|-----------------|-----------------|
| Signalling        | Olfactory transduction        | 258439          | Olfr1309        | -3.08981        |
|                   |                               | 258879          | Olfr330         | -2.76283        |
|                   |                               | 258692          | Olfr1442        | -2.5026         |
|                   |                               | 404335          | Olfr1535        | -2.39943        |
|                   |                               | 258766          | Olfr259         | -1.93446        |
|                   |                               | 258969          | Olfr1226        | -1.68754        |
|                   |                               | 258751          | Olfr608         | -1.55582        |
|                   |                               | 258689          | Olfr1466        | -1.47231        |
|                   |                               | 18315           | Olfr18          | -1.39071        |
|                   |                               | 258820          | Olfr1184        | -1.38599        |
|                   |                               | 18345           | Olfr46          | -1.27984        |
|                   |                               | 258549          | Olfr798         | -1.17812        |
|                   |                               | 258633          | Olfr1153        | -1.03563        |
|                   |                               | 258207          | Olfr452         | -1.00468        |
|                   |                               | 258772          | Olfr821         | -0.99624        |
|                   |                               | 258392          | Olfr190         | -0.95696        |
|                   |                               | 258499          | Olfr945         | -0.91291        |
|                   |                               | 259016          | Olfr1048        | -0.90774        |
|                   |                               | 258464          | Olfr1384        | -0.87283        |
|                   |                               | 12325           | Camk2g          | -0.85629        |
|                   |                               | 258887          | Olfr1294        | -0.84054        |
|                   |                               | 258477          | Olfr197         | -0.77396        |
|                   |                               | 258532          | Olfr373         | -0.72847        |
|                   |                               | 258713          | Olfr430         | -0.69518        |
|                   |                               | 258502          | Olfr279         | -0.61717        |
|                   |                               | 258484          | Olfr1410        | -0.60585        |
|                   |                               | 258527          | Olfr1368        | -0.60206        |
|                   |                               | 320129          | Adrbk2          | -0.59922        |
|                   |                               | 258815          | Olfr1218        | -0.59461        |
|                   |                               | <b>14913</b>    | <b>Guca1a</b>   | <b>0.626273</b> |
|                   |                               | <b>258825</b>   | <b>Olfr975</b>  | <b>0.817423</b> |
|                   | <b>258976</b>                 | <b>Olfr1262</b> | <b>1.383201</b> |                 |
| <b>258381</b>     | <b>Olfr460</b>                | <b>1.464693</b> |                 |                 |
| <b>258961</b>     | <b>Olfr631</b>                | <b>1.968851</b> |                 |                 |
|                   | G Protein signalling Pathways | 18761           | Prkcq           | -1.34532        |

|                 |                                |        |           |          |
|-----------------|--------------------------------|--------|-----------|----------|
|                 |                                | 18751  | Prkcb     | -1.18634 |
|                 |                                | 29863  | Pde7b     | -1.14388 |
|                 |                                | 319757 | Smo       | -0.90040 |
|                 |                                | 19057  | Ppp3cc    | -1.00873 |
|                 |                                | 14695  | Gnb3      | -0.97877 |
|                 |                                | 238276 | Akap5     | -0.94338 |
|                 |                                | 11513  | Adcy7     | -0.86202 |
|                 |                                | 14673  | Gna12     | -0.86126 |
|                 |                                | 16801  | Arhgef1   | -0.70168 |
|                 |                                | 14687  | Gnaz      | -0.69642 |
|                 |                                | 83397  | Akap12    | -0.64937 |
|                 |                                | 14706  | Gng4      | -0.63464 |
| Immune response | Cell adhesion molecules (CAMs) | 192167 | Nlgn1     | -2.08356 |
|                 |                                | 16401  | Itga4     | -1.32152 |
|                 |                                | 224754 | H2-M11    | -1.29746 |
|                 |                                | 15894  | Icam1     | -1.21248 |
|                 |                                | 60533  | Cd274     | -1.03935 |
|                 |                                | 20737  | Spn       | -1.03922 |
|                 |                                | 16403  | Itga6     | -1.03136 |
|                 |                                | 20970  | Sdc3      | -0.97302 |
|                 |                                | 80883  | Ntng1     | -0.96274 |
|                 |                                | 12562  | Cdh5      | -0.93428 |
|                 |                                | 15042  | H2-T24    | -0.93002 |
|                 |                                | 16414  | Itgb2     | -0.91394 |
|                 |                                | 320910 | Itgb8     | -0.89441 |
|                 |                                | 12524  | Cd86      | -0.84888 |
|                 |                                | 12504  | Cd4       | -0.81738 |
|                 |                                | 245537 | Nlgn3     | -0.80663 |
|                 |                                | 18417  | Cldn11    | -0.78674 |
|                 |                                | 12805  | Cntn1     | -0.73044 |
|                 |                                | 15019  | H2-Q8     | -0.72762 |
|                 |                                | 50723  | Icosl     | -0.7219  |
|                 |                                | 14991  | H2-M3     | -0.69415 |
|                 |                                | 547349 | LOC547349 | -0.66324 |
|                 | Innate Immune System           | 13429  | Dnm1      | -0.62205 |
|                 |                                | 12504  | Cd4       | -0.81738 |
|                 |                                | 16414  | Itgb2     | -0.91394 |
|                 |                                | 170743 | Tlr7      | -0.72769 |
|                 |                                | 56743  | Lat2      | -0.65261 |
|                 |                                | 76884  | Cyfip2    | -1.52672 |
|                 |                                | 140579 | Elmo2     | -0.81886 |

|  |               |           |               |          |
|--|---------------|-----------|---------------|----------|
|  |               | 14360     | Fyn           | -0.63732 |
|  |               | 103967    | Dnm3          | -0.80914 |
|  |               | 12628     | Cfh           | -1.02214 |
|  |               | 12268     | C4b           | -1.13577 |
|  |               | 195046    | Nlrp1a        | -0.68831 |
|  |               | 18595     | Pdgfra        | -1.07342 |
|  |               | 317677    | C1s2          | -0.81699 |
|  |               | 16885     | Limk1         | -0.60718 |
|  |               | 108960    | Irak2         | -0.82573 |
|  |               | 328572    | Ep300         | -0.9958  |
|  |               | 11820     | App           | -0.60252 |
|  |               | 16150     | Ikbkb         | -0.63611 |
|  |               | 12326     | Camk4         | -1.42283 |
|  |               | 50909     | C1ra          | -1.14292 |
|  |               | 12503     | Cd247         | -1.25342 |
|  |               | 80987     | Nckipsd       | -0.6101  |
|  |               | 16635     | Klra4         | -2.32696 |
|  |               | 15951     | Ifi204        | -1.02764 |
|  |               | 18761     | Prkcq         | -1.34532 |
|  |               | 100040462 | Mndal         | -1.56423 |
|  |               | 217069    | Trim25        | -0.75227 |
|  |               | 18591     | Pdgfb         | -0.63586 |
|  |               | 12266     | C3            | -1.19742 |
|  |               | 26414     | Mapk10        | -0.77253 |
|  |               | 13869     | ErbB4         | -0.89524 |
|  |               | 18186     | Nrp1          | -0.63787 |
|  |               | 12524     | Cd86          | -0.84888 |
|  |               | 11513     | Adcy7         | -0.86202 |
|  |               | 57257     | Vav3          | -0.89394 |
|  |               | 21898     | Tlr4          | -0.80896 |
|  |               | 214403    | Gm4788        | -2.30009 |
|  |               | 19200     | Pstpip1       | -0.77605 |
|  |               | 320148    | B430306N03Rik | -1.41436 |
|  |               | 17079     | Cd180         | -1.41635 |
|  | Immune System | 16635     | Klra4         | -2.32696 |
|  |               | 214403    | Gm4788        | -2.30009 |
|  |               | 16178     | Il1r2         | -2.02507 |
|  |               | 100040462 | Mndal         | -1.56423 |
|  |               | 76884     | Cyfip2        | -1.52672 |
|  |               | 21354     | Tap1          | -1.5234  |
|  |               | 56508     | Rapgef4       | -1.42788 |

|  |  |        |               |          |
|--|--|--------|---------------|----------|
|  |  | 12326  | Camk4         | -1.42283 |
|  |  | 17079  | Cd180         | -1.41635 |
|  |  | 320148 | B430306N03Rik | -1.41436 |
|  |  | 16197  | Il7r          | -1.40769 |
|  |  | 18761  | Prkcq         | -1.34532 |
|  |  | 16401  | Itga4         | -1.32152 |
|  |  | 12503  | Cd247         | -1.25342 |
|  |  | 240168 | Rasgrp3       | -1.24337 |
|  |  | 15894  | Icam1         | -1.21248 |
|  |  | 12266  | C3            | -1.19742 |
|  |  | 18751  | Prkcb         | -1.18634 |
|  |  | 83490  | Pik3ap1       | -1.18421 |
|  |  | 50909  | C1ra          | -1.14292 |
|  |  | 12268  | C4b           | -1.13577 |
|  |  | 16331  | Inpp5d        | -1.1318  |
|  |  | 18595  | Pdgfra        | -1.07342 |
|  |  | 20469  | Sipa1         | -1.05513 |
|  |  | 60533  | Cd274         | -1.03935 |
|  |  | 15951  | Ifi204        | -1.02764 |
|  |  | 12628  | Cfh           | -1.02214 |
|  |  | 328572 | Ep300         | -0.9958  |
|  |  | 65256  | Asb2          | -0.93911 |
|  |  | 16414  | Itgb2         | -0.91394 |
|  |  | 13869  | Erbp4         | -0.89524 |
|  |  | 57257  | Vav3          | -0.89394 |
|  |  | 11513  | Adcy7         | -0.86202 |
|  |  | 12325  | Camk2g        | -0.85629 |
|  |  | 12524  | Cd86          | -0.84888 |
|  |  | 108960 | Irak2         | -0.82573 |
|  |  | 58194  | Sh3kbp1       | -0.82002 |
|  |  | 140579 | Elmo2         | -0.81886 |
|  |  | 12504  | Cd4           | -0.81738 |
|  |  | 317677 | C1s2          | -0.81699 |
|  |  | 103967 | Dnm3          | -0.80914 |
|  |  | 21898  | Tlr4          | -0.80896 |
|  |  | 14026  | Evl           | -0.79651 |
|  |  | 19200  | Pstpip1       | -0.77605 |
|  |  | 26414  | Mapk10        | -0.77253 |
|  |  | 17470  | Cd200         | -0.76283 |
|  |  | 217069 | Trim25        | -0.75227 |
|  |  | 170743 | Tlr7          | -0.72769 |

|                      |                                   |        |                                  |          |        |          |
|----------------------|-----------------------------------|--------|----------------------------------|----------|--------|----------|
|                      |                                   | 15019  | H2-Q8                            | -0.72762 |        |          |
|                      |                                   | 74153  | Uba7                             | -0.72612 |        |          |
|                      |                                   | 50723  | Icosl                            | -0.7219  |        |          |
|                      |                                   | 14991  | H2-M3                            | -0.69415 |        |          |
|                      |                                   | 195046 | Nlrp1a                           | -0.68831 |        |          |
|                      |                                   | 11767  | Ap1m1                            | -0.67679 |        |          |
|                      |                                   | 56743  | Lat2                             | -0.65261 |        |          |
|                      |                                   | 18186  | Nrp1                             | -0.63787 |        |          |
|                      |                                   | 14360  | Fyn                              | -0.63732 |        |          |
|                      |                                   | 16150  | Ikbkb                            | -0.63611 |        |          |
|                      |                                   | 18591  | Pdgfb                            | -0.63586 |        |          |
|                      |                                   | 13429  | Dnm1                             | -0.62205 |        |          |
|                      |                                   | 80987  | Nckipsd                          | -0.6101  |        |          |
|                      |                                   | 16885  | Limk1                            | -0.60718 |        |          |
|                      |                                   | 11820  | App                              | -0.60252 |        |          |
| Extracellular matrix | Extracellular matrix organization | 240913 | Adamts4                          | -2.6206  |        |          |
|                      |                                   | 16402  | Itga5                            | -1.37853 |        |          |
|                      |                                   | 18453  | P4hb                             | -1.36286 |        |          |
|                      |                                   | 16401  | Itga4                            | -1.32152 |        |          |
|                      |                                   | 18198  | Musk                             | -1.27138 |        |          |
|                      |                                   | 50701  | Elane                            | -1.22146 |        |          |
|                      |                                   | 13004  | Ncan                             | -1.22049 |        |          |
|                      |                                   | 15894  | Icam1                            | -1.21248 |        |          |
|                      |                                   | 20970  | Sdc3                             | -0.97302 |        |          |
|                      |                                   | 16399  | Itga2b                           | -0.97158 |        |          |
|                      |                                   | 12153  | Bmp1                             | -0.93515 |        |          |
|                      |                                   | 16414  | Itgb2                            | -0.91394 |        |          |
|                      |                                   | 320910 | Itgb8                            | -0.89441 |        |          |
|                      |                                   | 213945 | Col28a1                          | -0.86825 |        |          |
|                      |                                   | 17390  | <i>Mmp2</i>                      | -0.82058 |        |          |
|                      |                                   | 216725 | Adamts2                          | -0.76482 |        |          |
|                      |                                   | 16779  | Lamb2                            | -0.70709 |        |          |
|                      |                                   | 108075 | Ltbp4                            | -0.70174 |        |          |
|                      |                                   | 14264  | Fmod                             | -0.65589 |        |          |
|                      |                                   | 18591  | Pdgfb                            | -0.63586 |        |          |
|                      |                                   | 237759 | Col23a1                          | -0.62811 |        |          |
|                      |                                   | 21892  | Tll1                             | -0.62532 |        |          |
|                      |                                   | 109711 | Actn1                            | -0.61951 |        |          |
|                      |                                   |        | Regulation of actin cytoskeleton | 16399    | Itga2b | -0.97158 |
|                      |                                   |        |                                  | 16401    | Itga4  | -1.32152 |
|                      |                                   |        |                                  | 16402    | Itga5  | -1.37853 |

|                   |                 |        |         |          |
|-------------------|-----------------|--------|---------|----------|
|                   |                 | 16403  | Itga6   | -1.03136 |
|                   |                 | 16414  | Itgb2   | -0.91394 |
|                   |                 | 76884  | Cyfip2  | -1.52672 |
|                   |                 | 109711 | Actn1   | -0.61951 |
|                   |                 | 18591  | Pdgfb   | -0.63586 |
|                   |                 | 18595  | Pdgfra  | -1.07342 |
|                   |                 | 20430  | Cyfip1  | -0.76709 |
|                   |                 | 73341  | Arhgef6 | -0.72228 |
|                   |                 | 12061  | Bdkrb1  | -0.90404 |
|                   |                 | 17698  | Msn     | -1.01169 |
|                   |                 | 14673  | Gna12   | -0.86126 |
|                   |                 | 12672  | Chrm4   | -0.97074 |
|                   |                 | 320910 | Itgb8   | -0.89441 |
|                   |                 | 16801  | Arhgef1 | -0.70168 |
|                   |                 | 57257  | Vav3    | -0.89394 |
|                   |                 | 70584  | Pak4    | -0.76162 |
|                   |                 | 16885  | Limk1   | -0.60718 |
|                   |                 | 227753 | Gsn     | -0.6912  |
| Neuronal response | Neuronal System | 20511  | Slc1a2  | -1.95335 |
|                   |                 | 12326  | Camk4   | -1.42283 |
|                   |                 | 110902 | Chrna2  | -1.35204 |
|                   |                 | 18751  | Prkcb   | -1.18634 |
|                   |                 | 15166  | Hcn2    | -1.18138 |
|                   |                 | 11448  | Chrne   | -1.04818 |
|                   |                 | 14695  | Gnb3    | -0.97877 |
|                   |                 | 16497  | Kcnab1  | -0.95345 |
|                   |                 | 238276 | Akap5   | -0.94338 |
|                   |                 | 16524  | Kcnj9   | -0.90225 |
|                   |                 | 11513  | Adcy7   | -0.86202 |
|                   |                 | 12325  | Camk2g  | -0.85629 |
|                   |                 | 330953 | Hcn4    | -0.84286 |
|                   |                 | 15168  | Hcn3    | -0.83643 |
|                   |                 | 110637 | Grik4   | -0.77339 |
|                   |                 | 11423  | Ache    | -0.77258 |
|                   |                 | 14415  | Gad1    | -0.77245 |
|                   |                 | 16528  | Kcnk4   | -0.75602 |
|                   |                 | 20907  | Stx1a   | -0.74224 |
|                   |                 | 54393  | Gabbr1  | -0.67084 |
|                   |                 | 55984  | Camkk1  | -0.67046 |
|                   |                 | 16511  | Kcnh2   | -0.66804 |
|                   |                 | 14706  | Gng4    | -0.63464 |



|  |                                                                                        |              |               |                |
|--|----------------------------------------------------------------------------------------|--------------|---------------|----------------|
|  |                                                                                        | 14814        | Grin2d        | -0.60631       |
|  |                                                                                        | 13162        | Slc6a3        | 0.95093        |
|  | Transmission across Chemical Synapses                                                  | 20511        | Slc1a2        | -1.95335       |
|  |                                                                                        | 12326        | Camk4         | -1.42283       |
|  |                                                                                        | 110902       | Chrna2        | -1.35204       |
|  |                                                                                        | 18751        | Prkcb         | -1.18634       |
|  |                                                                                        | 11448        | Chrne         | -1.04818       |
|  |                                                                                        | 14695        | Gnb3          | -0.97877       |
|  |                                                                                        | 238276       | Akap5         | -0.94338       |
|  |                                                                                        | 16524        | Kcnj9         | -0.90225       |
|  |                                                                                        | 11513        | Adcy7         | -0.86202       |
|  |                                                                                        | 12325        | Camk2g        | -0.85629       |
|  |                                                                                        | 110637       | Grik4         | -0.77339       |
|  |                                                                                        | 11423        | Ache          | -0.77258       |
|  |                                                                                        | 14415        | Gad1          | -0.77245       |
|  |                                                                                        | 20907        | Stx1a         | -0.74224       |
|  |                                                                                        | 54393        | Gabbr1        | -0.67084       |
|  |                                                                                        | 55984        | Camkk1        | -0.67046       |
|  |                                                                                        | 14706        | Gng4          | -0.63464       |
|  |                                                                                        | 14814        | Grin2d        | -0.60631       |
|  |                                                                                        | <b>13162</b> | <b>Slc6a3</b> | <b>0.95093</b> |
|  | Serotonin and anxiety-related events                                                   | 56193        | Plek          | -1.08686       |
|  |                                                                                        | 192167       | Nlgn1         | -2.08356       |
|  |                                                                                        | 14814        | Grin2d        | -0.60631       |
|  |                                                                                        | 18751        | Prkcb         | -1.18634       |
|  | Neurotransmitter Receptor Binding And Downstream Transmission In The Postsynaptic Cell | 12326        | Camk4         | -1.42283       |
|  |                                                                                        | 110902       | Chrna2        | -1.35204       |
|  |                                                                                        | 18751        | Prkcb         | -1.18634       |
|  |                                                                                        | 11448        | Chrne         | -1.04818       |
|  |                                                                                        | 14695        | Gnb3          | -0.97877       |
|  |                                                                                        | 238276       | Akap5         | -0.94338       |
|  |                                                                                        | 16524        | Kcnj9         | -0.90225       |
|  |                                                                                        | 11513        | Adcy7         | -0.86202       |
|  |                                                                                        | 12325        | Camk2g        | -0.85629       |
|  |                                                                                        | 110637       | Grik4         | -0.77339       |
|  |                                                                                        | 54393        | Gabbr1        | -0.67084       |
|  |                                                                                        | 55984        | Camkk1        | -0.67046       |
|  |                                                                                        | 14706        | Gng4          | -0.63464       |
|  |                                                                                        | 14814        | Grin2d        | -0.60631       |
|  | HCN channels                                                                           | 15166        | Hcn2          | -1.18138       |
|  |                                                                                        | 15168        | Hcn3          | -0.83643       |

|  |  |        |      |          |
|--|--|--------|------|----------|
|  |  | 330953 | Hcn4 | -0.84286 |
|--|--|--------|------|----------|

**Supplementary table 5: Result of the GSEA of the DEG after exposure to E171 in combination with AOM/DSS in the distal colon of BALB/c mice.**

| Days of exposure | Group of pathways      | Pathways                                                          | q-value  | Measured genes |
|------------------|------------------------|-------------------------------------------------------------------|----------|----------------|
| 2 days           | Signalling             | Olfactory transduction                                            | 0.183    | 31             |
| 7 days           | Signalling             | Phosphatidylinositol signalling system                            | 4.58E-05 | 17             |
|                  | Xenobiotics metabolism | Biological oxidations                                             | 0.000441 | 47             |
|                  |                        | Drug metabolism - other enzymes                                   | 0.00291  | 17             |
|                  |                        | Drug metabolism - cytochrome P450                                 | 0.00415  | 25             |
|                  |                        | Phase 1 - Functionalization of compounds                          | 0.00514  | 30             |
|                  |                        | Metabolism of xenobiotics by cytochrome P450                      | 0.0103   | 26             |
|                  |                        | Cytochrome P450 - arranged by substrate type                      | 0.0138   | 23             |
|                  |                        | Synthesis of epoxy (EET) and dihydroxyeicosatrienoic acids (DHET) | 0.0454   | 10             |
|                  |                        | Synthesis of (16-20)-hydroxyeicosatetraenoic acids (HETE)         | 0.0454   | 10             |
|                  | Metabolism of protein  | Metabolism                                                        | 0.00291  | 253            |
|                  |                        | Inositol phosphate metabolism                                     | 0.0162   | 12             |
|                  |                        | Inositol phosphate metabolism                                     | 0.0162   | 13             |
|                  |                        | Linoleic acid metabolism                                          | 0.0185   | 16             |
|                  |                        | Pentose and glucuronate interconversions                          | 0.0454   | 10             |
|                  |                        | Retinol metabolism                                                | 0.0454   | 19             |
|                  | Immune response        | Cytokine-cytokine receptor interaction                            | 0.00113  | 67             |
|                  |                        | Hematopoietic cell lineage                                        | 0.0039   | 19             |
|                  |                        | Spinal Cord Injury                                                | 0.00415  | 23             |
|                  |                        | Staphylococcus aureus infection                                   | 0.00182  | 17             |
|                  | Cancer signalling      | Chemical carcinogenesis                                           | 0.0194   | 25             |
|                  | Extracellular Matrix   | Extracellular matrix organization                                 | 1.10E-07 | 75             |
|                  |                        | Collagen formation                                                | 0.00139  | 22             |

|         |                                            |                                                              |         |     |
|---------|--------------------------------------------|--------------------------------------------------------------|---------|-----|
|         | organisation                               | Activation of Matrix Metalloproteinases                      | 0.00182 | 17  |
|         |                                            | Degradation of the extracellular matrix                      | 0.00182 | 31  |
|         |                                            | Collagen biosynthesis and modifying enzymes                  | 0.0039  | 15  |
|         |                                            | Matrix Metalloproteinases                                    | 0.0162  | 13  |
|         |                                            | Assembly of collagen fibrils and other multimeric structures | 0.038   | 12  |
|         | Digestive system                           | Bile secretion                                               | 0.031   | 26  |
|         | Disease                                    | Maturity onset diabetes of the young                         | 0.0103  | 13  |
|         | Haemostasis                                | Platelet degranulation                                       | 0.0347  | 20  |
|         |                                            | Response to elevated platelet cytosolic Ca <sup>2+</sup>     | 0.0368  | 21  |
|         | Muscle                                     | Striated Muscle Contraction                                  | 0.00986 | 16  |
|         |                                            | Muscle contraction                                           | 0.0144  | 17  |
|         | Neuronal response                          | Serotonergic synapse                                         | 0.0454  | 29  |
|         | Transmembrane transport of small molecules | Membrane Trafficking                                         | 0.0039  | 15  |
|         |                                            | Transmembrane transport of small molecules                   | 0.035   | 110 |
| 14 days | Signalling                                 | Signal Transduction                                          | 0.00988 | 225 |
|         |                                            | Signalling by GPCR                                           | 0.0215  | 169 |
|         |                                            | GPCR downstream signalling                                   | 0.0284  | 157 |
|         | Xenobiotics metabolism                     | Cytochrome P450 - arranged by substrate type                 | 0.0215  | 15  |
|         |                                            | Biological oxidations                                        | 0.0215  | 29  |
|         |                                            | Phase 1 - Functionalization of compounds                     | 0.0284  | 19  |
|         | Metabolism of proteins                     | Retinol metabolism                                           | 0.0232  | 20  |
|         |                                            | Metabolism of proteins                                       | 0.0346  | 31  |
|         | Immune response                            | Innate Immune System                                         | 0.0215  | 28  |
|         |                                            | Immune System                                                | 0.0222  | 58  |
|         |                                            | Natural killer cell mediated cytotoxicity                    | 0.0346  | 15  |
|         | Extracellular                              | Extracellular matrix organization                            | 0.0215  | 23  |

|         |                        |                                                                           |          |    |
|---------|------------------------|---------------------------------------------------------------------------|----------|----|
|         | Matrix organisation    |                                                                           |          |    |
|         | Digestive system       | Bile secretion                                                            | 0.0408   | 16 |
|         | Haemostasis            | Response to elevated platelet cytosolic Ca <sup>2+</sup>                  | 0.0346   | 11 |
|         | Cellular Processes     | Regulation of actin cytoskeleton                                          | 0.0222   | 19 |
|         |                        | XPodNet - protein-protein interactions in the podocyte expanded by STRING | 0.0279   | 76 |
|         |                        | Focal Adhesion                                                            | 0.0404   | 13 |
| 21 days | Signalling             | Signal Transduction                                                       | 5.65E-10 | 80 |
|         |                        | Signalling by GPCR                                                        | 7.69E-07 | 47 |
|         |                        | GPCR downstream signalling                                                | 6.43E-06 | 42 |
|         |                        | GPCR ligand binding                                                       | 0.000203 | 20 |
|         |                        | Class A/1 (Rhodopsin-like receptors)                                      | 0.00061  | 17 |
|         |                        | G alpha (i) signalling events                                             | 0.00105  | 16 |
|         |                        | Non-odorant GPCRs                                                         | 0.00193  | 14 |
|         |                        | Signalling by NGF                                                         | 0.00193  | 13 |
|         |                        | Olfactory transduction                                                    | 0.00193  | 34 |
|         |                        | G Protein Signalling Pathways                                             | 0.0034   | 12 |
|         |                        | GPCRs, Class A Rhodopsin-like                                             | 0.00601  | 11 |
|         |                        | HIF-1 signalling pathway                                                  | 0.0101   | 10 |
|         |                        | Peptide ligand-binding receptors                                          | 0.014    | 11 |
|         |                        | NGF signalling via TRKA from the plasma membrane                          | 0.014    | 9  |
|         |                        | Wnt signalling pathway                                                    | 0.014    | 9  |
|         | Metabolism of proteins | Metabolism                                                                | 1.10E-06 | 39 |
|         |                        | Metabolism of carbohydrates                                               | 0.000444 | 16 |
|         |                        | Glycosaminoglycan metabolism                                              | 0.014    | 9  |
|         |                        | MPS I - Hurler syndrome                                                   | 0.014    | 9  |

|  |                 |                                        |          |    |
|--|-----------------|----------------------------------------|----------|----|
|  |                 | MPS II - Hunter syndrome               | 0.014    | 9  |
|  |                 | MPS IIIA - Sanfilippo syndrome A       | 0.014    | 9  |
|  |                 | MPS IIIB - Sanfilippo syndrome B       | 0.014    | 9  |
|  |                 | MPS IIIC - Sanfilippo syndrome C       | 0.014    | 9  |
|  |                 | MPS IIID - Sanfilippo syndrome D       | 0.014    | 9  |
|  |                 | MPS IV - Morquio syndrome A            | 0.014    | 9  |
|  |                 | MPS IV - Morquio syndrome B            | 0.014    | 9  |
|  |                 | MPS VI - Maroteaux-Lamy syndrome       | 0.014    | 9  |
|  |                 | MPS VII - Sly syndrome                 | 0.014    | 9  |
|  |                 | MPS IX - Natowicz syndrome             | 0.014    | 9  |
|  |                 | Mucopolysaccharidoses                  | 0.014    | 9  |
|  |                 | Metabolism of proteins                 | 0.0238   | 8  |
|  | Immune response | Innate Immune System                   | 2.91E-10 | 41 |
|  |                 | Immune System                          | 5.65E-10 | 63 |
|  |                 | Adaptive Immune System                 | 1.49E-07 | 30 |
|  |                 | Cell adhesion molecules (CAMs)         | 1.27E-05 | 22 |
|  |                 | HTLV-I infection                       | 0.000244 | 17 |
|  |                 | Cytokine-cytokine receptor interaction | 0.000723 | 15 |
|  |                 | T Cell Receptor Signalling Pathway     | 0.00193  | 13 |
|  |                 | Leukocyte transendothelial migration   | 0.00193  | 13 |
|  |                 | Epstein-Barr virus infection           | 0.00193  | 13 |
|  |                 | B Cell Receptor Signalling Pathway     | 0.00601  | 11 |
|  |                 | Tuberculosis                           | 0.00601  | 11 |
|  |                 | Herpes simplex infection               | 0.00601  | 11 |
|  |                 | DAP12 interactions                     | 0.0101   | 10 |
|  |                 | Chemokine signalling pathway           | 0.0101   | 10 |
|  |                 | Toll-Like Receptors Cascades           | 0.0101   | 10 |

|  |                   |                                                                          |          |    |
|--|-------------------|--------------------------------------------------------------------------|----------|----|
|  |                   | Signalling by the B Cell Receptor (BCR)                                  | 0.0101   | 10 |
|  |                   | Fc epsilon receptor (FCERI) signalling                                   | 0.0101   | 10 |
|  |                   | NF-kappa B signalling pathway                                            | 0.0101   | 10 |
|  |                   | DAP12 signalling                                                         | 0.014    | 9  |
|  |                   | Toll Like Receptor 4 (TLR4) Cascade                                      | 0.014    | 9  |
|  |                   | Complement and coagulation cascades                                      | 0.014    | 9  |
|  |                   | Natural killer cell mediated cytotoxicity                                | 0.014    | 9  |
|  |                   | Hematopoietic cell lineage                                               | 0.014    | 9  |
|  |                   | Viral myocarditis                                                        | 0.014    | 9  |
|  |                   | Chemokine signalling pathway                                             | 0.0238   | 8  |
|  |                   | Complement and Coagulation Cascades                                      | 0.0238   | 8  |
|  |                   | Pertussis                                                                | 0.0238   | 8  |
|  |                   | Immunoregulatory interactions between a Lymphoid and a non-Lymphoid cell | 0.0238   | 8  |
|  |                   | Cytokine Signalling in Immune system                                     | 0.0238   | 8  |
|  |                   | T cell receptor signalling pathway                                       | 0.0238   | 8  |
|  |                   | Downstream Signalling Events Of B Cell Receptor (BCR)                    | 0.0238   | 8  |
|  |                   | Influenza A                                                              | 0.0238   | 8  |
|  |                   | B cell receptor signalling pathway                                       | 0.0238   | 8  |
|  | Cancer signalling | PI3K-Akt signalling pathway                                              | 0.000244 | 17 |
|  |                   | Pathways in cancer                                                       | 0.000244 | 17 |
|  |                   | Transcriptional misregulation in cancer                                  | 0.000444 | 16 |
|  |                   | Viral carcinogenesis                                                     | 0.000723 | 15 |
|  |                   | Integrin-mediated Cell Adhesion                                          | 0.0034   | 12 |
|  |                   | Proteoglycans in cancer                                                  | 0.00601  | 11 |
|  |                   | Cell Cycle                                                               | 0.0101   | 10 |
|  |                   | MicroRNAs in cancer                                                      | 0.014    | 9  |

|  |                                   |                                                                           |          |    |
|--|-----------------------------------|---------------------------------------------------------------------------|----------|----|
|  |                                   | Cell Cycle, Mitotic                                                       | 0.0238   | 8  |
|  |                                   | MAPK signalling pathway                                                   | 0.0238   | 8  |
|  |                                   | Ras signalling pathway                                                    | 0.0252   | 15 |
|  | Extracellular Matrix organisation | Extracellular matrix organization                                         | 6.94E-06 | 23 |
|  | Disease                           | Disease                                                                   | 6.56E-06 | 29 |
|  | Haemostasis                       | Hemostasis                                                                | 7.69E-07 | 27 |
|  |                                   | Calcium Regulation in the Cardiac Cell                                    | 0.00193  | 13 |
|  |                                   | Platelet activation, signalling and aggregation                           | 0.00193  | 13 |
|  |                                   | Calcium signalling pathway                                                | 0.0034   | 12 |
|  |                                   | Potassium Channels                                                        | 0.0101   | 10 |
|  |                                   | Cell surface interactions at the vascular wall                            | 0.014    | 9  |
|  | Cellular Processes                | XPodNet - protein-protein interactions in the podocyte expanded by STRING | 5.87E-07 | 38 |
|  |                                   | Regulation of actin cytoskeleton                                          | 2.35E-05 | 21 |
|  |                                   | Endocytosis                                                               | 0.000504 | 20 |
|  |                                   | Phagosome                                                                 | 0.00122  | 14 |
|  |                                   | PodNet- protein-protein interactions in the podocyte                      | 0.00122  | 14 |
|  |                                   | Focal adhesion                                                            | 0.00122  | 14 |
|  |                                   | Regulation of Actin Cytoskeleton                                          | 0.00193  | 13 |
|  |                                   | Focal Adhesion                                                            | 0.0034   | 12 |
|  |                                   | Gene Expression                                                           | 0.0292   | 10 |
|  | Muscle                            | Myometrial Relaxation and Contraction Pathways                            | 0.0238   | 8  |
|  |                                   | Vascular smooth muscle contraction                                        | 0.0238   | 8  |
|  | Neuronal response                 | Developmental Biology                                                     | 0.000174 | 18 |
|  |                                   | Neuronal System                                                           | 0.000244 | 25 |



|  |                                            |                                                                                        |          |    |
|--|--------------------------------------------|----------------------------------------------------------------------------------------|----------|----|
|  |                                            | Axon guidance                                                                          | 0.000244 | 17 |
|  |                                            | Neuroactive ligand-receptor interaction                                                | 0.000723 | 15 |
|  |                                            | Neurotransmitter Receptor Binding And Downstream Transmission In The Postsynaptic Cell | 0.00122  | 14 |
|  |                                            | Transmission across Chemical Synapses                                                  | 0.00256  | 19 |
|  |                                            | Osteoclast differentiation                                                             | 0.0101   | 10 |
|  |                                            | Cholinergic synapse                                                                    | 0.014    | 9  |
|  |                                            | L1CAM interactions                                                                     | 0.014    | 9  |
|  |                                            | Glutamatergic synapse                                                                  | 0.0238   | 8  |
|  | Transmembrane transport of small molecules | Transmembrane transport of small molecules                                             | 0.00457  | 18 |
|  | Other                                      | Circadian entrainment                                                                  | 0.014    | 9  |
